# Supplementary material for: Association between cardiometabolic disease and severe COVID-19: a nationwide case–control study of patients requiring invasive mechanical ventilation
Source: PubMed Central journal article supplement (PMC7893210; doi:10.1136/bmjopen-2020-044486), 2021-02-17
Supplement: bmjopen-2020-044486.draft_revisions.pdf [file bmjopen-2020-044486.draft_revisions.pdf]

# BMJ Open

BMJ Open is committed to open peer review. As part of this commitment we make the peer review history of every article we publish publicly available.

When an article is published we post the peer reviewers' comments and the authors' responses online. We also post the versions of the paper that were used during peer review. These are the versions that the peer review comments apply to.

The versions of the paper that follow are the versions that were submitted during the peer review process. They are not the versions of record or the final published versions. They should not be cited or distributed as the published version of this manuscript.

BMJ Open is an open access journal and the full, final, typeset and author-corrected version of record of the manuscript is available on our site with no access controls, subscription charges or pay-per-view fees (<http://bmjopen.bmj.com>).

If you have any questions on BMJ Open's open peer review process please email [info.bmjopen@bmj.com](mailto:info.bmjopen@bmj.com)

# BMJ Open

## Cardiometabolic factors and risk for severe Covid-19 requiring invasive mechanical ventilation during the Swedish epidemic

|                               |                                                                                                                                                                                                                                                                                                                                                                                                                                       |
|-------------------------------|---------------------------------------------------------------------------------------------------------------------------------------------------------------------------------------------------------------------------------------------------------------------------------------------------------------------------------------------------------------------------------------------------------------------------------------|
| Journal:                      | <i>BMJ Open</i>                                                                                                                                                                                                                                                                                                                                                                                                                       |
| Manuscript ID                 | bmjopen-2020-044486                                                                                                                                                                                                                                                                                                                                                                                                                   |
| Article Type:                 | Original research                                                                                                                                                                                                                                                                                                                                                                                                                     |
| Date Submitted by the Author: | 05-Sep-2020                                                                                                                                                                                                                                                                                                                                                                                                                           |
| Complete List of Authors:     | Svensson, Per; Karolinska Institutet Department of Clinical Science and Education Sodersjukhuset,<br>Hofmann, Robin; Karolinska Institute, Department of Clinical Science and Education, Södersjukhuset<br>Häbel, Henrike; Institute of Environmental Medicine<br>Jernberg, Tomas; Danderyd University Hospital, Karolinska Institutet<br>Nordberg, Per; Karolinska institutet, Dept. of Cardiology, Centre for Resuscitation Science |
| Keywords:                     | COVID-19, Diabetes & endocrinology < INTERNAL MEDICINE, Hypertension < CARDIOLOGY, INTENSIVE & CRITICAL CARE                                                                                                                                                                                                                                                                                                                          |
|                               |                                                                                                                                                                                                                                                                                                                                                                                                                                       |

SCHOLARONE™  
Manuscripts

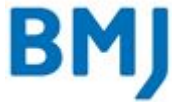

I, the Submitting Author has the right to grant and does grant on behalf of all authors of the Work (as defined in the below author licence), an exclusive licence and/or a non-exclusive licence for contributions from authors who are: i) UK Crown employees; ii) where BMJ has agreed a CC-BY licence shall apply, and/or iii) in accordance with the terms applicable for US Federal Government officers or employees acting as part of their official duties; on a worldwide, perpetual, irrevocable, royalty-free basis to BMJ Publishing Group Ltd ("BMJ") its licensees and where the relevant Journal is co-owned by BMJ to the co-owners of the Journal, to publish the Work in this journal and any other BMJ products and to exploit all rights, as set out in our [licence](#).

The Submitting Author accepts and understands that any supply made under these terms is made by BMJ to the Submitting Author unless you are acting as an employee on behalf of your employer or a postgraduate student of an affiliated institution which is paying any applicable article publishing charge ("APC") for Open Access articles. Where the Submitting Author wishes to make the Work available on an Open Access basis (and intends to pay the relevant APC), the terms of reuse of such Open Access shall be governed by a Creative Commons licence – details of these licences and which [Creative Commons](#) licence will apply to this Work are set out in our licence referred to above.

Other than as permitted in any relevant BMJ Author's Self Archiving Policies, I confirm this Work has not been accepted for publication elsewhere, is not being considered for publication elsewhere and does not duplicate material already published. I confirm all authors consent to publication of this Work and authorise the granting of this licence.

1  
2  
3  
4  
5 **Cardiometabolic factors and risk for severe Covid-19 requiring invasive mechanical**  
6 **ventilation during the Swedish epidemic**  
7  
8  
9

10  
11  
12  
13 Per Svensson, MD, PhD<sup>1,2</sup>; Robin Hofmann, MD, PhD<sup>1,2</sup>; Henrike Häbel, PhD<sup>3</sup>; Tomas  
14 Jernberg, MD, PhD<sup>4</sup>; and Per Nordberg, MD, PhD<sup>5,2</sup>  
15

- 16  
17  
18 1. Department of Clinical Science and Education, Södersjukhuset, Karolinska Institutet,  
19 Stockholm, Sweden  
20  
21  
22 2. Department of Cardiology, Södersjukhuset, Stockholm, Sweden  
23  
24  
25 3. Institute of Environmental Medicine, Division of Biostatistics, Karolinska Institutet,  
26 Stockholm, Sweden  
27  
28  
29 4. Department of Clinical Sciences, Danderyd University Hospital, Karolinska Institutet,  
30 Stockholm, Sweden  
31  
32  
33 5. Department of Medicine Solna, Karolinska Institutet, Stockholm, Sweden  
34  
35  
36

37 **Word count:** 4637  
38  
39  
40  
41  
42  
43  
44  
45  
46  
47  
48

49 **Correspondence to:** Per Svensson  
50 Assoc. Prof, MD, FESC  
51 Department of Clinical Science and Education, Södersjukhuset, Karolinska Institutet  
52 Department of Cardiology, Södersjukhuset  
53 Sjukhusbacken 10, SE 118 83 Stockholm, Sweden. +46 (0)8 616 3014  
54 Email: [per.svensson@ki.se](mailto:per.svensson@ki.se)  
55 Twitter: [@perpersvensson](https://twitter.com/perpersvensson)  
56  
57  
58  
59  
60

## ABSTRACT

### Aims:

The risks associated with diabetes, obesity and hypertension for severe Covid-19 may be confounded and differ by sociodemographic background. We assessed the risks associated with cardiometabolic factors for severe Covid-19 when accounting for socioeconomic factors and in subgroups by age, sex and region of birth.

### Methods and results

In this nationwide case-control study, 1,086 patients admitted to intensive care with Covid-19 requiring mechanical ventilation (cases) and 10,860 population-based controls matched for age, sex and district of residency were included from mandatory national registries. Odds Ratios (ORs) with 95% confidence intervals (CIs) for associations between severe Covid-19 and exposures with adjustment for confounders were estimated using logistic regression. The median age was 62 years (IQR 52-70), and 3,003 (24.9%) were female. Type 2 diabetes (OR, 2.3 [95% CI, 1.9-2.7]), hypertension (OR, 1.7 [95% CI, 1.5-2.0]), obesity (OR, 3.1 [95% CI, 2.4-4.0]) and chronic kidney disease (OR, 2.5 [95% CI, 1.7-3.7]) were all associated with severe Covid-19. In the younger subgroup (below 62 years) ORs were significantly higher for all cardiometabolic risk factors. The risk associated with type 2 diabetes was higher in women ( $p=0.001$ ) and in patients with a region of birth outside EU ( $p=0.004$ ).

### Conclusion

Diabetes, obesity and hypertension were all independently associated with severe Covid-19 with stronger associations in the younger population. Type 2 diabetes implied a greater risk among women and in non-EU immigrants. These findings, originating from high-quality

1  
2  
3 Swedish registries, may be important to direct preventive measures such as vaccination to  
4  
5 susceptible patient groups.  
6  
7  
8  
9

10 **Trial registration:** Clinicaltrial.gov (NCT04426084)  
11  
12  
13  
14  
15  
16  
17  
18  
19  
20  
21  
22  
23  
24  
25  
26  
27  
28  
29  
30  
31  
32  
33  
34  
35  
36  
37  
38  
39  
40  
41  
42  
43  
44  
45  
46  
47  
48  
49  
50  
51  
52  
53  
54  
55  
56  
57  
58  
59  
60

For peer review only

## STRENGTH AND LIMITATIONS OF THIS STUDY

- In difference to many previous reports, this study accounts for severity of Covid-19 and provide a homogeneous study group, by only including intubated patients at the intensive care with the highest risk of death. By inclusion of virtually all such cases nationwide, in a country with a tax-financed health care and a serious epidemic during the study period, the study provides a large sample size with adequate power and high external validity.
- This study compared severe Covid-19 patients with matched controls in the underlying population and used 10 population-based, age, sex and district of residence matched controls per each case. Therefore the study can provide estimates of relative risk for severe Covid-19 in the population for the studied risk factors.
- Socioeconomic factors have been crucial in how the pandemic has impacted on different groups in the society but are also closely linked with obesity, diabetes and cardiovascular disease. By matching for district of residence and adjusting for individual level data on several socioeconomic variables this study provide novel evidence that diabetes, obesity and hypertension are independently associated with severe Covid-19, but also that the relative importance of risk factors differ by age, sex and region of birth.
- The data on exposures are from high quality national registries with national coverage and the patient cohort is the most complete Swedish cohort on severe Covid-19 published to date. The findings may be important to direct preventive measures such as vaccination to susceptible patient groups.

## INTRODUCTION

Observational data suggest both a higher prevalence, and a more severe course of corona virus disease 2019 (Covid-19) among individuals with diabetes, obesity and hypertension,<sup>1-5</sup> risk factors that are closely linked and cluster together in the metabolic syndrome.<sup>6</sup> As more clinical data are emerging, new determinants of both Covid-19 and severity of disease are being discussed, such as coagulation disorders<sup>7</sup> and socio-economic factors<sup>8</sup> but to this point the underlying mechanisms that link cardiometabolic disease with severe Covid-19 are unclear.<sup>9</sup>

In order to advance the knowledge on risk factors, several aspects are crucial to put evidence into perspective: First, the spectrum of disease severity needs to be addressed as the clinical presentation of infected patients can range from asymptomatic, to severe with high risk of fatal outcome. As the risks of being infected may differ from the risk of becoming severely ill once infected, there is a need for studies that focus on risk factors associated with a severe disease. Second, as socio-economic and cultural factors are closely linked to type 2 diabetes, obesity and cardiovascular disease, these need to be accounted for in such analyses. And, most importantly, prevalent cases need to be compared to controls to reliably assess the magnitude of the major risk factors in the underlying population.<sup>10</sup> To our knowledge, no study has investigated whether cardiometabolic risk factors are independently associated with severe Covid-19, when controlled for age, sex, sociodemographic factors, and immigrant background using matched population-based controls. In addition, it is unknown whether the impact of these cardiometabolic risk factors is attenuated by age, sex and sociodemographic factors.

Sweden has been hit hard by the Covid-19 epidemic but in contrast to most other countries, did not employ a strict lock-down policy. To continuously evaluate the situation, strong governmental efforts were enforced on national health care registries for data reporting.



1  
2  
3 In this study we present a comprehensive Swedish sample originating from mandatory, high-  
4 quality national registries with the aim to investigate whether cardiometabolic risk factors are  
5 associated with severe Covid-19 in patients treated at the intensive care unit with invasive  
6 mechanical ventilation.  
7  
8  
9  
10  
11  
12  
13  
14  
15  
16

## 17 **METHODS**

### 18 **Study design and ethics**

19  
20  
21 This nationwide case-control study was based on data from the Swedish Intensive Care  
22 Registry (SIR) on patients (cases) with severe Covid-19 admitted to the ICU requiring  
23 invasive mechanical ventilation between 1<sup>st</sup> of March until 11<sup>th</sup> of May 2020. For each case,  
24 10 controls were randomly selected from the Swedish Population Register and matched by  
25 age, sex and district of residence (corresponding to part of municipality). The study database  
26 was merged with multiple mandatory Swedish national registries at Statistics Sweden and the  
27 National Board of Health and Welfare using each individual's unique personal identification  
28 number.<sup>11</sup> The study complied with the Declaration of Helsinki, was approved by the National  
29 Ethical Review Board (identification number 2020/124-31/4) and registered at  
30 Clinicaltrial.gov (NCT04426084). The study used already collected, pseudonymized data and  
31 involved minimal infringement of personal integrity.  
32  
33  
34  
35  
36  
37  
38  
39  
40  
41  
42  
43  
44  
45  
46  
47  
48

### 49 **Patient and Public Involvement**

50  
51 Patients and the public were not involved in the design, or conduct of our research.  
52  
53  
54  
55

### 56 **National registries and Data collection**

1  
2  
3 Severe COVID-19 was defined as laboratory confirmed COVID-19 infection in individuals  
4 treated at the intensive care unit (ICU) with mechanical ventilation. These cases were reported  
5 to SIR<sup>12</sup> which is a national register with about 95% coverage of all ICU admissions in  
6 Sweden and was used to identify eligible patients. The National Patient Register<sup>13</sup> was used to  
7 collect primary or secondary diagnoses from previous hospital admissions and outpatients'  
8 visits coded according to the International Classification of Diseases (ICD) version 10 within  
9 the 15 years preceding the admission. The Prescribed Drugs Register contains information on  
10 all dispensed drugs according to the Anatomical Therapeutic Chemical Classification (ATC).  
11 We collected individual data on dispensed drugs prescribed and claimed within 12 months  
12 before the study period. The longitudinal integrated database for health insurance and labor  
13 market studies is managed by Statistics Sweden and includes annual measurements on several  
14 socioeconomic and sociodemographic variables, including income, education and country of  
15 birth.<sup>14</sup>

### 35 **Definition of Exposures and Outcomes**

36  
37 Exposures were a history of cardiometabolic or relevant chronic disease including  
38 hypertension (defined as previous diagnosis of ICD I10 or prescription of antihypertensive  
39 drugs within the preceding 12 months as described previously<sup>15</sup>), hyperlipidemia (ICD E78 or  
40 prescription of lipid lowering drugs within the preceding 12 months), diabetes mellitus type  
41 2(ICD E11 or prescription of antidiabetic drugs within the preceding 12 months), diabetes  
42 mellitus type 1 (ICD E10), obesity (ICD E66), heart failure (ICD I50.1, I50.9), atrial  
43 fibrillation (ICD I48), venous thromboembolism (ICD I26, I80), asthma (ICD J45), chronic  
44 obstructive pulmonary disease (ICD J44), chronic kidney disease (ICD N18), malignancy  
45 (ICD C, D40-48), rheumatoid arthritis (ICD M05, M06), systemic inflammatory disease (ICD  
46 M30-M36), and inflammatory bowel disease (ICD K50, K51). A history of cardiovascular  
47  
48  
49  
50  
51  
52  
53  
54  
55  
56  
57  
58  
59  
60

1  
2  
3 disease (CVD) was defined as a record of either MI (ICD I21, I22), ischemic heart disease  
4 (ICD I25), ischemic stroke (ICD I63), or peripheral vascular disease (ICD I70-I73), in the  
5 Swedish Patient Register (Supplementary eTable1).  
6  
7  
8  
9

### 10 11 12 **Definition of covariates and variables for subgroup analyses**

13  
14 Level of education was categorized as  $\leq 9$  years (reference), 10-12 years, and  $>12$  years based  
15 on the highest educational level attained during the year before admission. Region of birth  
16 was categorized as a country of birth within EU15 (Austria, Belgium, Denmark, Finland,  
17 France, Germany, Greece, Ireland, Italy, Luxembourg, Netherlands, Portugal, Spain, Sweden,  
18 United Kingdom) and/or the Nordic Countries (Denmark, Finland, Iceland, Norway,  
19 Sweden), or having a country of birth outside this region. Marital status during the year before  
20 index date was categorized as married or not married which included unmarried, divorced,  
21 and widowed. Subgroup analyses were performed for region of birth, sex (male/female) and  
22 age (above/below median age).  
23  
24  
25  
26  
27  
28  
29  
30  
31  
32  
33  
34  
35  
36  
37

### 38 **Outcome**

39  
40 The outcome was defined as an ICU admission due to Covid-19, registered in SIR, with at  
41 least one episode of invasive mechanical ventilation during the ICU stay. All eligible patients  
42 during the study period were included as cases in the study.  
43  
44  
45  
46  
47  
48

### 49 **Statistical Methods**

50  
51 Categorical variables are reported as frequencies and percentages, while continuous variables  
52 are reported as median and interquartile range (IQR). Missing data are reported in  
53 Supplemental eTable 2. Odds ratios (OR) and 95% confidence intervals (CI) for the  
54 association between the different exposures and the outcome were calculated by means of  
55  
56  
57  
58  
59  
60

1  
2  
3 logistic regression adjusted for age and sex (Model 1). For all exposures additional  
4  
5 adjustments were made for sociodemographic and socioeconomic variables (marital status,  
6  
7 region of birth and educational level) (Model 2) and, finally, for all conditions in table 2a that  
8  
9 were used as covariates in a fully adjusted regression model (Model 3) in order to analyse  
10  
11 both total effects unconfounded of sociodemographic variables and direct effects in  
12  
13 accordance to our perception of causal relationships as illustrated by the directed acyclic  
14  
15 graphs in supplementary figure S1. Standard errors were calculated using the robust sandwich  
16  
17 estimator and the significance level was set at an alpha of 0.05. For a formal test of a  
18  
19 significant difference between the ORs for different subgroups, likelihood-ratio tests were  
20  
21 conducted between a model with and without an interaction term between the indicator  
22  
23 variable for the subgroup and the risk factor. For these tests, the robust sandwich estimator  
24  
25 was not used in the underlying logistic regression models.  
26  
27  
28  
29

30 Statistical analyses were performed using Stata version 16.0 (StataCorp, College Station, TX).  
31  
32  
33  
34  
35  
36  
37  
38  
39  
40  
41  
42  
43  
44  
45  
46  
47  
48  
49  
50  
51  
52  
53  
54  
55  
56  
57  
58  
59  
60

## RESULTS

During the study period between 1<sup>st</sup> of March until 11<sup>th</sup> of May 2020, a total of 1,417 patients were admitted to an intensive care unit in Sweden due to Covid-19 out of which 1,086 required treatment with invasive mechanical ventilation (cases). For each case, 10 matched control subjects were randomly selected, rendering a total of 10,860 control subjects. The study population selection procedure and reasons for exclusions are described in Supplemental Figure S2.

### Patient characteristics

The median age was 62 (IQR 52-70) years and 75% were men. Baseline characteristics are summarized in Table 1a. Patients were less likely to have a post-secondary education and more likely to be married compared to the control group. Further, patients were more likely to have history of migration with more patients having a region of birth outside EU15 and the Nordic countries. Comorbid conditions were more common among patients with Covid-19 receiving mechanical ventilation compared to the control group. In particular, cardiometabolic risk factors were overrepresented with more patients having a history of hypertension, hyperlipidemia, diabetes mellitus, obesity and chronic kidney disease, but also venous thromboembolic disease, asthma and systemic inflammatory diseases were more common. Due to more comorbid conditions, patients had correspondingly more pharmacological treatments (table 1b). All antihypertensive treatments were more common among patients compared to controls subjects as were all antidiabetic treatments except meglitinides.

### Comparison of risk factors and treatments between patient with severe Covid-19 and controls

1  
2  
3 In the multivariable logistic regression models presented in table 2a, both diabetes,  
4  
5 hypertension, hyperlipidemia, obesity and chronic kidney disease were associated with Covid-  
6  
7 19 receiving mechanical ventilation. All associations remained significant after adjustment for  
8  
9 possible socioeconomic confounders. In the fully adjusted model, all cardiometabolic risk  
10  
11 factors except hyperlipidemia were associated with the outcome indicating direct and additive  
12  
13 effects for these risk factors (figure 1). In addition, we observed associations between a  
14  
15 history of venous thromboembolic disease, asthma, rheumatoid arthritis, as well as systemic  
16  
17 inflammatory disease and severe Covid-19. In contrast, neither cardiovascular disease, heart  
18  
19 failure, atrial fibrillation, malignancy, chronic obstructive pulmonary disease or inflammatory  
20  
21 bowel disease were associated with the outcome.  
22  
23  
24  
25  
26  
27

28  
29 In the logistic regression analysis adjusted for age and sex using no treatment as reference, all  
30  
31 types of antihypertensive treatment, except diuretics and all types of antidiabetic treatments,  
32  
33 except meglinitides, were associated with severe Covid-19 (table 2b). However, when  
34  
35 adjusting for all comorbidities in the fully adjusted model, calcium-channel blockers,  
36  
37 biguanides and glitazones were the only treatments which remained associated with the  
38  
39 outcome.  
40  
41  
42  
43

### 44 **Subgroup analysis**

45  
46 Baseline characteristics by subgroups of age, sex and region of birth are summarized in  
47  
48 supplemental eTable 3, eTable 4 and eTable 5 respectively. A regression analysis for the  
49  
50 cardiometabolic risk factors is presented in table 3 by subgroups of age, sex and region of  
51  
52 birth. In the younger subgroup (defined as age below median of 62), odds ratios were  
53  
54 significantly higher for hypertension (p-value for interaction,  $p < 0.001$ ), type 2 diabetes  
55  
56 ( $p < 0.001$ ), obesity ( $p = 0.027$ ), cardiovascular disease ( $p = 0.013$ ), chronic kidney disease  
57  
58 ( $p = 0.010$ ), and asthma ( $p = 0.022$ ) as illustrated in figure 2. In women, the odds ratios for type  
59  
60

1  
2  
3 2 diabetes ( $p=0.001$ ) and asthma ( $p=0.030$ ) were significantly higher as compared to men  
4 (figure 3). Among patients with a region of birth outside EU 15, diabetes had a stronger  
5  
6 association with severe Covid-19 compared to patients with a region of birth within EU15  
7  
8 ( $p=0.004$ ), whereas a trend towards the opposite was observed for obesity (figure 4).  
9  
10  
11  
12  
13  
14  
15  
16  
17  
18  
19  
20  
21  
22  
23  
24  
25  
26  
27  
28  
29  
30  
31  
32  
33  
34  
35  
36  
37  
38  
39  
40  
41  
42  
43  
44  
45  
46  
47  
48  
49  
50  
51  
52  
53  
54  
55  
56  
57  
58  
59  
60

For peer review only

## DISCUSSION

In the present nationwide case-control study, assessing the risk for severe Covid-19 with need for mechanical ventilation at the intensive care unit, we found that the cardiometabolic risk factors diabetes, obesity and hypertension, were strongly and independently associated with severe infection also when accounting for socioeconomic factors. Furthermore, we found higher risks associated with all cardiometabolic risk factors among younger patients whereas diabetes was more important in women and in those with an immigrant background. These findings, originating from high-quality national registries in Sweden which has been experiencing a serious epidemic, may be important to identify susceptible patient groups requiring extra precautions and prioritized for vaccination.

Cardiometabolic risk factors were early linked with a severe Covid-19 in case-series<sup>16</sup> and uncontrolled studies<sup>17</sup> and later in studies using population-based control subjects.<sup>2</sup> Here, we confirm these findings and extend them to patients with severe disease in a well-controlled design. We can reinforce that diabetes, obesity and hypertension - risk factors that are closely linked and often cluster together in the metabolic syndrome<sup>18</sup> - all have strong and independent direct associations with the outcome. By adjusting for sociodemographic factors, we can also show for the first time that obesity and other components of the metabolic syndrome - factors that are closely linked with lower socioeconomic status<sup>19</sup> - act on Covid-19 independent of sociodemography. The effect of diabetes was even stronger in the population with an immigrant background.

Previous studies on hypertension as a risk factor for severe disease<sup>20</sup> may have been confounded by age and until now, there has been limited evidence of hypertension being an independent risk factor.<sup>21</sup> We are aware of only one major study that used population-based



1  
2  
3 controls, but that study did not report associations of hypertension with severe disease.<sup>2</sup> Here,  
4  
5 we can report that hypertension is not only a risk factor independent of age and other related  
6  
7 conditions, but also that risk factor patterns differ by age, sex, and region of birth. In the  
8  
9 younger subgroup (age below 62 years) all cardiometabolic factors had an even stronger  
10  
11 association with severe Covid-19. In women and individuals born outside EU 15, diabetes had  
12  
13 the strongest association with the outcome. All components of metabolic syndrome are  
14  
15 associated with endothelial dysfunction<sup>22</sup> and low-grade inflammation.<sup>23</sup> Hypertension is also  
16  
17 linked with a dysregulated immune system,<sup>24</sup> including endothelial mechanisms,<sup>25</sup> and is  
18  
19 causally associated with increased lymphocyte count.<sup>26</sup> As emerging evidence suggests that  
20  
21 endothelial inflammation is involved in serious manifestations of Covid-19,<sup>27</sup> it is possible  
22  
23 that a common mechanism linking cardiometabolic risk factors with severe Covid-19 is  
24  
25 mediated through endothelial and microcirculatory dysfunction. Our findings suggest that  
26  
27 these mechanisms are even more important at a younger age.  
28  
29  
30  
31  
32  
33  
34

35 We identified asthma, previous thromboembolic disease, rheumatoid arthritis, and systemic  
36  
37 inflammatory disease as additional chronic diseases with increased risk for a severe course of  
38  
39 Covid-19. This is new and important information as patients with chronic inflammatory  
40  
41 conditions may also be more susceptible to the proinflammatory pathways of the infection  
42  
43 that involves diffuse endothelial inflammation and systemic impaired microcirculation  
44  
45 leading to multiorgan dysfunction.<sup>27</sup>  
46  
47  
48  
49  
50

51 The association between socioeconomic factors and cardiovascular disease is well  
52  
53 established<sup>19</sup> and socioeconomic factors have also been important during the Covid-19-  
54  
55 pandemic.<sup>28 29</sup> We therefore believe that matching for residency, which is linked with  
56  
57  
58  
59  
60

1  
2  
3 socioeconomic factors, as well as adjustments for individual level information on migration,  
4 level of education and marital status, is a crucial factor in our study design.  
5  
6  
7  
8  
9

10 In comparison to several previous descriptive studies we have a well-characterised,  
11 homogenous, nationwide population with severe disease, all needing mechanical ventilation at  
12 the intensive care unit. To the best of our knowledge, this is the first study that includes  
13 virtually all cases with severe disease together with a population based matched control  
14 group. In addition, most previous studies include a heterogeneous mix of cases where other  
15 factors such as testing patterns in mild cases may have influenced overall results.<sup>2</sup>  
16  
17  
18  
19  
20  
21  
22

23 Consequently, the current study estimated relative risks in the population for developing  
24 severe Covid-19 which may differ from the risk of obtaining an infection with a milder course  
25 of disease. Since Swedish health care is virtually fully tax funded, all acute treatments  
26 including admission to the ICU with invasive mechanical ventilation, are based on medical  
27 decisions and do not involve private-economic considerations. Unequal access to health care  
28 is thereby reduced, increasing the validity of our results. There are some limitations with the  
29 present study. First, in terms of external validity, patient selection for intensive care treatment  
30 including invasive ventilation may differ between countries,<sup>30</sup> however, it is unlikely that this  
31 will affect the relative importance of risk factors. Second, we did not have any information  
32 concerning the rate of mild infection with Covid-19 among control subjects. Finally, the  
33 observational design of the study cannot exclude the potential of residual confounding and the  
34 results should be interpreted as such.  
35  
36  
37  
38  
39  
40  
41  
42  
43  
44  
45  
46  
47  
48  
49  
50  
51  
52  
53  
54  
55  
56  
57  
58  
59  
60

## CONCLUSIONS

Diabetes, obesity and hypertension were all independently associated with severe Covid-19 requiring mechanical ventilation at the intensive care unit, with strongest associations in the younger population. Type 2 diabetes implied a greater risk among women and in those with immigrant background. These findings, originating from high-quality Swedish registries, may be important to direct preventive measures such as vaccination to susceptible patient groups.

For peer review only

## Funding

This work was supported by grants from the Region Stockholm (ALF-project, grant number 2019-0100).

RH was supported by Region Stockholm (clinical postdoctoral appointment, grant number K 2017-4577) and the Swedish Heart Lung foundation (grant number 20180187)

## ACKNOWLEDGMENTS

### Authors' contributions

PS had full access to all the data in the study and takes full responsibility for the integrity of the data and accuracy of the data analysis.

*Study concept and design:* PS, PN, HH.

*Acquisition of data:* PS

*Analysis and interpretation of data:* All authors

*Drafting the manuscript:* PS, RH, PN.

*Critical revision of the manuscript for important intellectual content:* All authors

*Statistical analysis:* HH.

*Obtained funding:* PS

### Disclosures

The authors declare that there is no conflict of interest.

### Data availability

1  
2  
3 The data underlying this article cannot be shared publicly due to the privacy of individuals  
4  
5 that participated in the study. The data will be shared on reasonable request to the  
6  
7  
8 corresponding author.  
9  
10  
11  
12  
13  
14  
15  
16  
17  
18  
19  
20  
21  
22  
23  
24  
25  
26  
27  
28  
29  
30  
31  
32  
33  
34  
35  
36  
37  
38  
39  
40  
41  
42  
43  
44  
45  
46  
47  
48  
49  
50  
51  
52  
53  
54  
55  
56  
57  
58  
59  
60

For peer review only

**REFERENCES**

1. Zhou F, Yu T, Du R, et al. Clinical course and risk factors for mortality of adult inpatients with COVID-19 in Wuhan, China: a retrospective cohort study. *Lancet (London, England)*. 2020.
2. Mancia G, Rea F, Ludergnani M, Apolone G, Corrao G. Renin–Angiotensin–Aldosterone System Blockers and the Risk of Covid-19. *New England Journal of Medicine*. 2020.
3. Fosbol EL, Butt JH, Ostergaard L, et al. Association of Angiotensin-Converting Enzyme Inhibitor or Angiotensin Receptor Blocker Use With COVID-19 Diagnosis and Mortality. *JAMA*. 2020.
4. Petrilli CM, Jones SA, Yang J, et al. Factors associated with hospital admission and critical illness among 5279 people with coronavirus disease 2019 in New York City: prospective cohort study. *BMJ*. 2020;369:m1966.
5. Sattar N, McInnes IB, McMurray JJV. Obesity a Risk Factor for Severe COVID-19 Infection: Multiple Potential Mechanisms. *Circulation*. 2020.
6. Stefan N. Causes, consequences, and treatment of metabolically unhealthy fat distribution. *The Lancet Diabetes & Endocrinology*. 2020;8(7):616-627.
7. Becker RC. COVID-19 update: Covid-19-associated coagulopathy. *J Thromb Thrombolysis*. 2020;50(1):54-67.
8. Pareek M, Bangash MN, Pareek N, et al. Ethnicity and COVID-19: an urgent public health research priority. *Lancet*. 2020;395(10234):1421-1422.
9. Bornstein SR, Rubino F, Khunti K, et al. Practical recommendations for the management of diabetes in patients with COVID-19. *The Lancet Diabetes & Endocrinology*. 2020;8(6):546-550.

- 1  
2  
3 10. Lipsitch M, Swerdlow DL, Finelli L. Defining the Epidemiology of Covid-19 -  
4  
5 Studies Needed. *The New England journal of medicine*. 2020;382(13):1194-1196.  
6  
7
- 8 11. Ludvigsson JF, Otterblad-Olausson P, Pettersson BU, Ekblom A. The Swedish  
9  
10 personal identity number: possibilities and pitfalls in healthcare and medical research.  
11  
12 *European Journal of Epidemiology*. 2009;24(11):659-667.  
13
- 14 12. Swedish registry for Intensive Care. National Quality Registry for Intensive Care.  
15  
16 [http://kvalitetsregister.se/englishpages/findaregistry/registerarkivenglish/nationalquality](http://kvalitetsregister.se/englishpages/findaregistry/registerarkivenglish/nationalqualityregistryforintensivecaresir.2175.html)  
17  
18 [registryforintensivecaresir.2175.html](http://kvalitetsregister.se/englishpages/findaregistry/registerarkivenglish/nationalqualityregistryforintensivecaresir.2175.html).  
19  
20
- 21 13. Ludvigsson JF, Andersson E, Ekblom A, et al. External review and validation of the  
22  
23 Swedish national inpatient register. *BMC Public Health*. 2011;11:450.  
24
- 25 14. Ludvigsson JF, Svedberg P, Olén O, Bruze G, Neovius M. The longitudinal integrated  
26  
27 database for health insurance and labour market studies (LISA) and its use in medical  
28  
29 research. *European Journal of Epidemiology*. 2019;34(4):423-437.  
30  
31
- 32 15. Oras P, Habel H, Skoglund PH, Svensson P. Elevated Blood Pressure in the  
33  
34 Emergency Department: A Risk Factor for Incident Cardiovascular Disease.  
35  
36 *Hypertension (Dallas, Tex : 1979)*. 2020;75(1):229-236.  
37  
38
- 39 16. Wang D, Hu B, Hu C, et al. Clinical Characteristics of 138 Hospitalized Patients With  
40  
41 2019 Novel Coronavirus–Infected Pneumonia in Wuhan, China. *JAMA*.  
42  
43 2020;323(11):1061-1069.  
44  
45
- 46 17. Grasselli G, Zangrillo A, Zanella A, et al. Baseline Characteristics and Outcomes of  
47  
48 1591 Patients Infected With SARS-CoV-2 Admitted to ICUs of the Lombardy Region,  
49  
50 Italy. *JAMA*. 2020;323(16):1574-1581.  
51  
52
- 53 18. Torpy JM, Lynm C, Glass RM. The Metabolic Syndrome. *JAMA*. 2006;295(7):850-  
54  
55 850.  
56  
57  
58  
59  
60

19. Schultz WM, Kelli HM, Lisko JC, et al. Socioeconomic Status and Cardiovascular Outcomes. *Circulation*. 2018;137(20):2166-2178.
20. Gao C, Cai Y, Zhang K, et al. Association of hypertension and antihypertensive treatment with COVID-19 mortality: a retrospective observational study. *European Heart Journal*. 2020;41(22):2058-2066.
21. Kreutz R, Algharably EAE, Azizi M, et al. Hypertension, the renin-angiotensin system, and the risk of lower respiratory tract infections and lung injury: implications for COVID-19. *Cardiovasc Res*. 2020.
22. Tziomalos K, Athyros VG, Karagiannis A, Mikhailidis DP. Endothelial dysfunction in metabolic syndrome: prevalence, pathogenesis and management. *Nutrition, metabolism, and cardiovascular diseases : NMCD*. 2010;20(2):140-146.
23. Hotamisligil GS. Inflammation and metabolic disorders. *Nature*. 2006;444(7121):860-867.
24. Drummond GR, Vinh A, Guzik TJ, Sobey CG. Immune mechanisms of hypertension. *Nature reviews Immunology*. 2019;19(8):517-532.
25. Loperena R, Van Beusecum JP, Itani HA, et al. Hypertension and increased endothelial mechanical stretch promote monocyte differentiation and activation: roles of STAT3, interleukin 6 and hydrogen peroxide. *Cardiovasc Res*. 2018;114(11):1547-1563.
26. Siedlinski M, Jozefczuk E, Xu X, et al. White Blood Cells and Blood Pressure: A Mendelian Randomization Study. *Circulation*. 2020;141(16):1307-1317.
27. Pons S, Fodil S, Azoulay E, Zafrani L. The vascular endothelium: the cornerstone of organ dysfunction in severe SARS-CoV-2 infection. *Critical care (London, England)*. 2020;24(1):353.



- 1  
2  
3 28. Price-Haywood EG, Burton J, Fort D, Seoane L. Hospitalization and Mortality among  
4 Black Patients and White Patients with Covid-19. *New England Journal of Medicine*.  
5  
6 2020;382(26):2534-2543.  
7  
8  
9  
10 29. Lassale C, Gaye B, Hamer M, Gale CR, Batty GD. Ethnic disparities in hospitalisation  
11 for COVID-19 in England: The role of socioeconomic factors, mental health, and  
12 inflammatory and pro-inflammatory factors in a community-based cohort study.  
13  
14 *Brain, behavior, and immunity*. 2020.  
15  
16  
17  
18  
19 30. Rhodes A, Ferdinande P, Flaatten H, Guidet B, Metnitz PG, Moreno RP. The  
20 variability of critical care bed numbers in Europe. *Intensive care medicine*.  
21  
22 2012;38(10):1647-1653.  
23  
24  
25  
26  
27  
28  
29  
30  
31  
32  
33  
34  
35  
36  
37  
38  
39  
40  
41  
42  
43  
44  
45  
46  
47  
48  
49  
50  
51  
52  
53  
54  
55  
56  
57  
58  
59  
60

## FIGURE LEGENDS

### **Figure 1. Associations of cardiometabolic risk factors with severe Covid-19 (adjusted odds ratios with 95% Cis).**

†Adjusted for age, sex, educational level, marital status and region of birth.

‡Adjusted for age, sex, educational level, marital status, region of birth and all diagnoses in table 2a

### **Figure 2. Associations of cardiometabolic risk factors with severe Covid-19 by age below or over median age of 62 years (adjusted odds ratios with 95% Cis).**

P-values denote likelihood-ratio tests between a model with and one without an interaction term between the indicator variable for the subgroup and the risk factor added to model 2

### **Figure 3. Associations of cardiometabolic risk factors with severe Covid-19 by sex (adjusted odds ratios with 95% Cis).**

P-values denote likelihood-ratio tests between a model with and one without an interaction term between the indicator variable for the subgroup and the risk factor added to model 2

### **Figure 4. Associations of cardiometabolic risk factors with severe Covid-19 by region of birth \* (adjusted odds ratios with 95% Cis).**

\*EU 15 comprises of Austria, Belgium, Denmark, Finland, France, Germany, Greece, Ireland, Italy,

Luxembourg, Netherlands, Portugal, Spain, Sweden, United Kingdom. The Nordic countries include Denmark, Finland, Iceland, Norway, and Sweden.

P-values denote likelihood-ratio tests between a model with and one without an interaction term between the indicator variable for the subgroup and the risk factor added to model 2

**APPENDICES**

Appendix A. Online Supplementary data

Supplemental methods – register information. 1

eTable 1 – Hypertension definitions. 2

eTable 2 - Missing Data in the Study Population. 3

eTable 3 - Baseline characteristics of the study population by age-group. 4

eTable 4 - Baseline characteristics of the study population by sex. 5

eTable 5. Baseline characteristics of the study population by region of birth. 6

Supplemental Figure S1 – Directed Acyclic Graph. 7

Supplemental Figure S2 - Exclusion flowchart. 8

**Table 1. Baseline characteristics of the study population.** Characteristics of patients with COVID-19 requiring mechanical ventilation and control subjects

|                                       | <b>COVID-19<br/>(n = 1,086)</b> | <b>Control subjects<br/>(n = 10,860)</b> |
|---------------------------------------|---------------------------------|------------------------------------------|
| Age, median (IQR), y                  | 62.0 (52.0-70.0)                | 62.0 (52.0-70.0)                         |
| <b>Sex:</b>                           |                                 |                                          |
| Male, No. (%)                         | 813 (74.9)                      | 8,130 (74.9)                             |
| <b>Sociodemographics No. (%)</b>      |                                 |                                          |
| Education (years)                     |                                 |                                          |
| ≤9                                    | 280 (26.8)                      | 2,144 (20.1)                             |
| 10-12                                 | 466 (44.6)                      | 4,805 (45.1)                             |
| ≥12                                   | 300 (28.7)                      | 3,712 (34.8)                             |
| Marital status                        |                                 |                                          |
| Widow                                 | 41 (3.8)                        | 405 (3.7)                                |
| Married                               | 632 (58.2)                      | 5,641 (51.9)                             |
| Single                                | 218 (20.1)                      | 2,802 (25.8)                             |
| Separated                             | 195 (18.0)                      | 2,012 (18.5)                             |
| Region of birth                       |                                 |                                          |
| EU 15* and/or Nordics                 | 596 (55.1)                      | 8,411 (77.5)                             |
| <b>Medical history No. (%)</b>        |                                 |                                          |
| Type 1 diabetes                       | 9 (0.8)                         | 39 (0.4)                                 |
| Type 2 diabetes                       | 276 (25.4)                      | 1,255 (11.6)                             |
| Obesity                               | 99 (9.1)                        | 328 (3.0)                                |
| Hypertension                          | 547 (50.4)                      | 4,258 (39.2)                             |
| Hyperlipidaemia                       | 292 (33.0)                      | 2,100 (28.6)                             |
| Chronic kidney disease                | 40 (3.7)                        | 146 (1.3)                                |
| Cardiovascular disease                | 105 (9.7)                       | 992 (9.1)                                |
| Myocardial infarction                 | 55 (5.1)                        | 559 (5.1)                                |
| Ischemic stroke                       | 29 (2.7)                        | 274 (2.5)                                |
| Peripheral artery disease             | 24 (2.2)                        | 249 (2.3)                                |
| Heart failure                         | 40 (3.7)                        | 329 (3.0)                                |
| Atrial fibrillation                   | 65 (6.0)                        | 589 (5.4)                                |
| Deep vein thrombosis                  | 40 (3.7)                        | 208 (1.9)                                |
| Pulmonary embolism                    | 13 (1.2)                        | 103 (0.9)                                |
| Chronic obstructive pulmonary disease | 32 (2.9)                        | 237 (2.2)                                |
| Asthma                                | 100 (9.2)                       | 376 (3.5)                                |
| Malignancy                            | 158 (14.5)                      | 1,740 (16.0)                             |
| Rheumatoid arthritis                  | 17 (1.6)                        | 96 (0.9)                                 |
| Systemic inflammatory disease         | 33 (3.0)                        | 129 (1.2)                                |
| Inflammatory bowel disease            | 17 (1.6)                        | 159 (1.5)                                |

\*EU 15 comprises of Austria, Belgium, Denmark, Finland, France, Germany, Greece, Ireland, Italy, Luxembourg, Netherlands, Portugal, Spain, Sweden, United Kingdom. The Nordic countries include Denmark, Finland, Iceland, Norway, and Sweden.

**Table 1b. Pharmacological treatments of the study population.**

|                                    | <b>Covid-19<br/>(n = 1,086)</b> | <b>Control subjects<br/>(n = 10,860)</b> |
|------------------------------------|---------------------------------|------------------------------------------|
| <b>Treatments No. (%)</b>          |                                 |                                          |
| <i>Antihypertensive treatments</i> |                                 |                                          |
| ACE inhibitors                     | 168 (15.5)                      | 1,310 (12.1)                             |
| ARBs                               | 218 (20.1)                      | 1,694 (15.6)                             |
| Calcium-channel blockers           | 239 (22.0)                      | 1,648 (15.2)                             |
| Beta-blockers                      | 222 (20.4)                      | 1,849 (17.0)                             |
| Diuretics                          | 51 (4.7)                        | 522 (4.8)                                |
| <i>Antidiabetic treatments</i>     |                                 |                                          |
| Any antidiabetics                  | 240 (22.1)                      | 1,144 (10.5)                             |
| Insulins                           | 80 (7.4)                        | 391 (3.6)                                |
| Biguanides                         | 200 (18.4)                      | 855 (7.9)                                |
| Sulfonylureas                      | 28 (2.6)                        | 93 (0.9)                                 |
| Glitazons                          | 6 (0.6)                         | 10 (0.1)                                 |
| DPP-4 inhibitors                   | 44 (4.1)                        | 210 (1.9)                                |
| GLP-1 RAs                          | 37 (3.4)                        | 184 (1.7)                                |
| SGLT-2 inhibitors                  | 46 (4.2)                        | 184 (1.7)                                |
| Meglitinides                       | 4 (0.4)                         | 34 (0.3)                                 |
| Statins                            | 288 (26.5)                      | 2,242 (20.6)                             |
| Aspirin                            | 136 (12.5)                      | 1,103 (10.2)                             |
| Other Antiplatelet drugs           | 20 (1.8)                        | 234 (2.2)                                |
| Warfarin                           | 17 (1.6)                        | 150 (1.4)                                |
| NOAC                               | 45 (4.1)                        | 474 (4.4)                                |

Abbreviations: ACE-inhibitors, angiotensin converting enzyme-inhibitors; ARBs, angiotensin receptor blockers; DPP-4 inhibitors, dipeptidyl peptidase-4 inhibitors; GLP-1 RAs, glucagon-like peptide-1 receptor agonists; SGLT2 inhibitors, sodium-glucose cotransporter-2 inhibitors  
NOAC, new oral anticoagulants

**Table 2a.** Odds ratios for Covid-19 requiring mechanical ventilation by cardiometabolic factors and other comorbidities..

| Risk factors           | Adjusted for age and sex |           |         | Adjusted model 2† |           |         | Adjusted model 3 ‡ |           |         |
|------------------------|--------------------------|-----------|---------|-------------------|-----------|---------|--------------------|-----------|---------|
|                        | OR                       | 95% CI    | p-value | OR                | 95% CI    | p-value | OR                 | 95% CI    | p-value |
| Type 1 diabetes        | 2.32                     | 1.12-4.81 | 0.023   | 3.13              | 1.52-6.42 | 0.002   | 2.56               | 1.25-5.24 | 0.010   |
| Type 2 diabetes        | 2.73                     | 2.33-3.20 | <0.001  | 2.25              | 1.90-2.65 | <0.001  | 1.81               | 1.49-2.19 | <0.001  |
| Obesity                | 3.23                     | 2.56-4.08 | <0.001  | 3.13              | 2.43-4.02 | <0.001  | 2.03               | 1.55-2.65 | <0.001  |
| Hypertension           | 1.76                     | 1.52-2.05 | <0.001  | 1.73              | 1.48-2.01 | <0.001  | 1.26               | 1.05-1.51 | <0.013  |
| Hyperlipidaemia        | 1.35                     | 1.15-1.58 | <0.001  | 1.22              | 1.03-1.43 | <0.018  | 0.90               | 0.75-1.09 | 0.286   |
| CKD                    | 2.83                     | 1.97-4.05 | <0.001  | 2.51              | 1.69-3.70 | <0.001  | 1.84               | 1.21-2.82 | 0.005   |
| CVD                    | 1.07                     | 0.86-1.33 | 0.554   | 1.03              | 0.82-1.29 | 0.789   | 0.75               | 0.58-0.96 | 0.022   |
| Heart failure          | 1.23                     | 0.87-1.73 | 0.236   | 1.13              | 0.79-1.62 | 0.48    | 0.78               | 0.51-1.19 | 0.253   |
| Atrial fibrillation    | 1.11                     | 0.85-1.46 | 0.43    | 1.24              | 0.93-1.64 | 0.136   | 1.04               | 0.75-1.43 | 0.819   |
| VTE                    | 1.74                     | 1.27-2.39 | 0.001   | 1.90              | 1.37-2.62 | <0.001  | 1.65               | 1.18-2.31 | 0.004   |
| COPD                   | 1.37                     | 0.94-1.99 | 0.105   | 1.34              | 0.91-1.97 | 0.133   | 0.87               | 0.56-1.36 | 0.552   |
| Asthma                 | 2.84                     | 2.26-3.58 | <0.001  | 2.78              | 2.18-3.53 | <0.001  | 2.25               | 1.74-2.90 | <0.001  |
| Malignancy             | 0.89                     | 0.74-1.06 | 0.195   | 0.97              | 0.80-1.17 | 0.725   | 0.85               | 0.70-1.04 | 0.103   |
| Rheumatoid arthritis   | 1.79                     | 1.06-3.00 | 0.029   | 1.86              | 1.11-3.12 | 0.019   | 1.27               | 0.72-2.23 | 0.407   |
| Systemic infl. disease | 2.65                     | 1.79-3.92 | <0.001  | 2.57              | 1.71-3.86 | <0.001  | 1.96               | 1.28-2.99 | 0.002   |
| Infl. bowel disease    | 1.07                     | 0.65-1.77 | 0.792   | 1.21              | 0.72-2.03 | 0.479   | 0.94               | 0.54-1.64 | 0.839   |

†Adjusted for age, sex, educational level, marital status and region of birth.

‡Adjusted for age, sex, educational level, marital status and region of birth and all diagnoses in table 2a

1  
2  
3 **Abbreviations** CVD, cardiovascular disease; VTE, venous thromboembolism; COPD, chronic obstructive  
4 pulmonary disease; CKD, chronic kidney disease.  
5  
6  
7  
8  
9  
10  
11  
12  
13  
14  
15  
16  
17  
18  
19  
20  
21  
22  
23  
24  
25  
26  
27  
28  
29  
30  
31  
32  
33  
34  
35  
36  
37  
38  
39  
40  
41  
42  
43  
44  
45  
46  
47  
48  
49  
50  
51  
52  
53  
54  
55  
56  
57  
58  
59  
60

For peer review only

**Table 2b.** Odds ratios for Covid-19 requiring mechanical ventilation by pharmacological treatments.

| Treatments                         | Adjusted for age and sex |           |         | Adjusted model 2† |           |         | Adjusted model 3 ‡ |           |         |
|------------------------------------|--------------------------|-----------|---------|-------------------|-----------|---------|--------------------|-----------|---------|
|                                    | OR                       | 95% CI    | p-value | OR                | 95% CI    | p-value | OR                 | 95% CI    | p-value |
| <i>Antihypertensive treatments</i> |                          |           |         |                   |           |         |                    |           |         |
| ACE-inhibitors                     | 1.35                     | 1.13-1.62 | 0.001   | 1.35              | 1.12-1.62 | 0.797   | 0.99               | 0.81-1.22 | 0.931   |
| ARBs                               | 1.39                     | 1.18-1.64 | <0.001  | 1.47              | 1.24-1.75 | <0.001  | 1.07               | 0.88-1.30 | 0.474   |
| CCBs                               | 1.64                     | 1.39-1.93 | <0.001  | 1.64              | 1.39-1.93 | <0.001  | 1.25               | 1.03-1.52 | 0.025   |
| Beta-blockers                      | 1.28                     | 1.08-1.51 | 0.004   | 1.27              | 1.07-1.51 | 0.007   | 0.90               | 0.73-1.11 | 0.345   |
| Diuretics                          | 0.98                     | 0.72-1.32 | 0.870   | 1.00              | 0.74-1.36 | 0.996   | 0.74               | 0.53-1.03 | 0.078   |
| <i>Antidiabetic treatments</i>     |                          |           |         |                   |           |         |                    |           |         |
| Insulins                           | 2.15                     | 1.67-2.77 | <0.001  | 1.90              | 1.46-2.47 | <0.001  | 0.85               | 0.62-1.16 | 0.305   |
| Biguanides                         | 2.72                     | 2.28-3.24 | <0.001  | 2.26              | 1.88-2.72 | <0.001  | 1.40               | 1.01-1.94 | 0.044   |
| Sulfonylureas                      | 3.08                     | 2.01-4.73 | <0.001  | 2.13              | 1.33-3.41 | 0.002   | 1.17               | 0.72-1.91 | 0.530   |
| Glitazons                          | 6.03                     | 2.19-16.6 | 0.001   | 5.46              | 1.98-15.0 | 0.001   | 2.86               | 1.04-7.85 | 0.042   |
| DPP-4 inhibitors                   | 2.16                     | 1.54-3.01 | <0.001  | 1.77              | 1.25-2.50 | 0.001   | 0.91               | 0.62-1.33 | 0.632   |
| GLP-1 RA                           | 2.79                     | 1.92-4.03 | <0.001  | 2.71              | 1.85-3.97 | <0.001  | 1.24               | 0.82-1.87 | 0.312   |
| SGLT-2 inhibitors                  | 2.58                     | 1.85-3.59 | <0.001  | 2.30              | 1.63-3.25 | <0.001  | 1.20               | 0.82-1.74 | 0.346   |
| Meglitinides                       | 1.18                     | 0.42-3.33 | 0.383   | 1.03              | 0.36-2.96 | 0.953   | 0.55               | 0.19-1.61 | 0.276   |
| Statins                            | 1.44                     | 1.23-1.69 | <0.001  | 1.32              | 1.12-1.55 | 0.001   | 0.84               | 0.63-1.13 | 0.247   |
| Aspirin                            | 1.29                     | 1.05-1.57 | 0.013   | 1.14              | 0.93-1.41 | 0.200   | 0.97               | 0.75-1.24 | 0.791   |
| Warfarin                           | 1.14                     | 0.68-1.90 | 0.622   | 1.29              | 0.76-2.17 | 0.347   | 0.96               | 0.52-1.76 | 0.894   |
| NOAC                               | 0.95                     | 0.69-1.30 | 0.730   | 1.04              | 0.75-1.44 | 0.806   | 0.70               | 0.46-1.06 | 0.093   |



1  
2  
3  
4  
5 †Adjusted for age, sex, educational level, marital status and region of birth.

6 ‡Adjusted for age, sex, educational level, marital status and region of birth and all diagnoses  
7 in table 2a

8 Abbreviations: ACE-inhibitors, angiotensin converting enzyme-inhibitors; ARBs, angiotensin  
9 receptor blockers; CCBs, calcium-channel blockers; DPP-4 inhibitors, dipeptidyl peptidase-4  
10 inhibitors; GLP-1 RA, glucagon-like peptide-1 receptor agonists; SGLT2 inhibitors, sodium-  
11 glucose cotransporter-2 inhibitors; NOAC, new oral anticoagulants  
12  
13  
14  
15  
16  
17  
18  
19  
20  
21  
22  
23  
24  
25  
26  
27  
28  
29  
30  
31  
32  
33  
34  
35  
36  
37  
38  
39  
40  
41  
42  
43  
44  
45  
46  
47  
48  
49  
50  
51  
52  
53  
54  
55  
56  
57  
58  
59  
60

For peer review only

**Table 3. Covid-19 risk factors by subgroups of age, sex and region of birth.** Odds ratios for Covid-19 receiving mechanical ventilation compared to matched control subjects by age (below/over median age 62 years), sex and region of birth (EU15).

|                           | Type 2 diabetes | Obesity       | Hypertension  | CKD           | CVD           | VTE           | A             |
|---------------------------|-----------------|---------------|---------------|---------------|---------------|---------------|---------------|
| <b>Age</b>                |                 |               |               |               |               |               |               |
| <i>&gt;62 years</i>       | 1.7 (1.3-2.1)   | 2.2 (1.5-3.4) | 1.3 (1.1-1.6) | 1.7 (1.0-2.9) | 0.9 (0.7-1.2) | 1.8 (1.2-2.7) | 2.1 (1.3-3.4) |
| <i>&lt;62 years</i>       | 3.3 (2.6-4.2)   | 4.0 (2.9-5.5) | 2.2 (1.8-2.6) | 3.1 (1.6-6.1) | 1.6 (1.1-2.4) | 2.2 (1.3-3.7) | 3.7 (2.1-6.4) |
| <i>p-value</i>            | <0.001          | 0.027         | <0.001        | 0.010         | 0.013         | 0.554         | 0.001         |
| <b>Sex</b>                |                 |               |               |               |               |               |               |
| <i>Male</i>               | 2.0 (1.7-2.4)   | 3.1 (2.3-4.3) | 1.7 (1.4-2.0) | 2.2 (1.4-3.4) | 1.0 (0.8-1.3) | 1.8 (1.3-2.6) | 2.3 (1.5-3.4) |
| <i>female</i>             | 3.5 (2.5-5.0)   | 3.2 (2.0-5.0) | 1.8 (1.3-2.5) | 4.2 (1.9-9.3) | 1.2 (0.7-2.2) | 2.2 (1.1-4.2) | 3.9 (2.1-6.9) |
| <i>p-value</i>            | 0.001           | 0.922         | 0.327         | 0.113         | 0.416         | 0.558         | 0.001         |
| <b>Region of birth</b>    |                 |               |               |               |               |               |               |
| <i>Outside EU15</i>       | 3.3 (2.6-4.2)   | 2.3 (1.6-3.4) | 1.8 (1.5-2.3) | 2.5 (1.4-4.6) | 1.4 (1.0-1.9) | 1.4 (0.8-2.4) | 3.2 (1.8-5.6) |
| <i>Within EU15/Nordic</i> | 2.0 (1.6-2.6)   | 3.7 (2.7-5.1) | 1.6 (1.3-1.9) | 2.6 (1.6-4.2) | 0.9 (0.7-1.2) | 2.0 (1.4-3.0) | 2.7 (1.6-4.5) |
| <i>p-value</i>            | 0.004           | 0.066         | 0.476         | 0.872         | 0.072         | 0.248         | 0.001         |

P-values denote likelihood-ratio tests between a model with and one without an interaction term between the indicator variable for the subgroup and the risk factor added to model 2. **Abbreviations:** CKD, chronic kidney disease, CVD, cardiovascular disease (history of myocardial infarction, ischemic stroke or peripheral arterial disease); VTE, venous thromboembolic disease.

1  
2  
3  
4  
5  
6  
7  
8  
9  
10  
11  
12  
13  
14  
15  
16  
17  
18  
19  
20  
21  
22  
23  
24  
25  
26  
27  
28  
29  
30  
31  
32  
33  
34  
35  
36  
37  
38  
39  
40  
41  
42  
43  
44  
45  
46  
47  
48  
49  
50  
51  
52  
53  
54  
55  
56  
57  
58  
59  
60

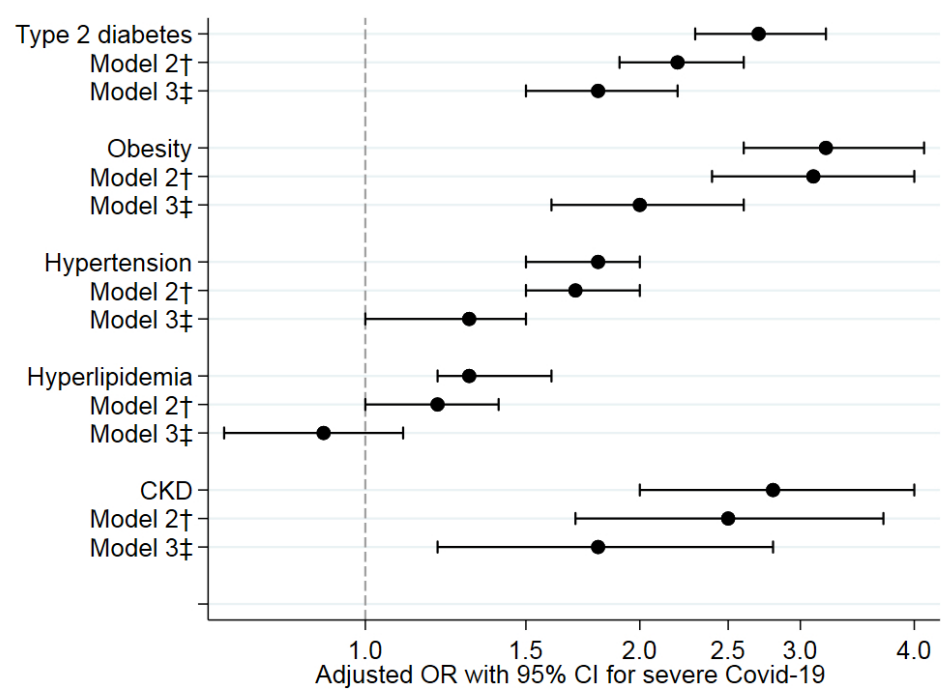

Associations of cardiometabolic risk factors with severe Covid-19 (adjusted odds ratios with 95% CIs).

364x265mm (72 x 72 DPI)

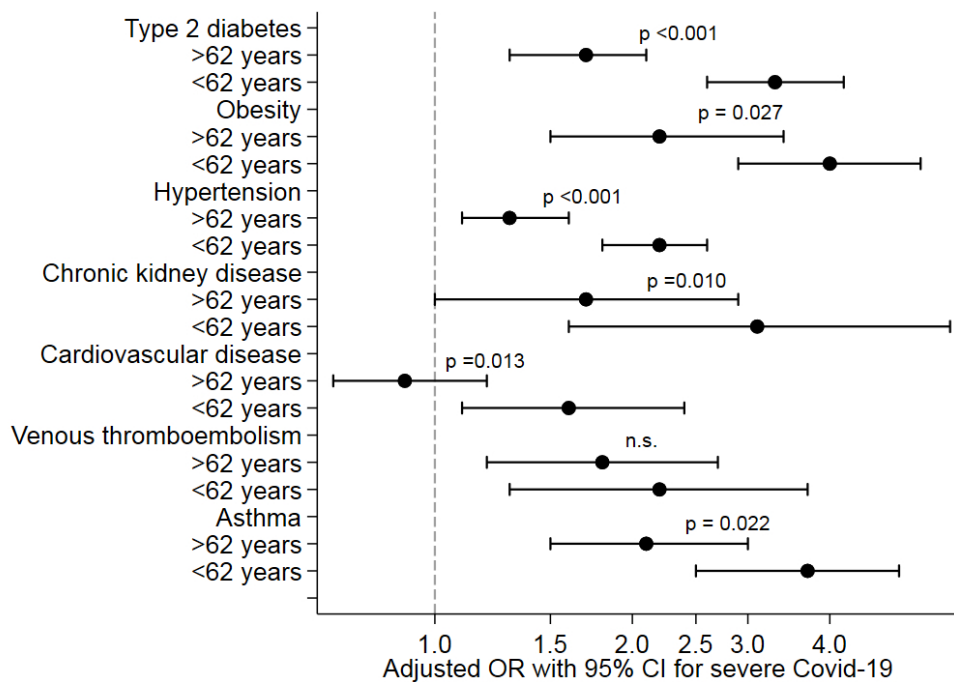

Associations of cardiometabolic risk factors with severe Covid-19 by age below or over median age of 62 years (adjusted odds ratios with 95% CIs).

364x265mm (72 x 72 DPI)

1  
2  
3  
4  
5  
6  
7  
8  
9  
10  
11  
12  
13  
14  
15  
16  
17  
18  
19  
20  
21  
22  
23  
24  
25  
26  
27  
28  
29  
30  
31  
32  
33  
34  
35  
36  
37  
38  
39  
40  
41  
42  
43  
44  
45  
46  
47  
48  
49  
50  
51  
52  
53  
54  
55  
56  
57  
58  
59  
60

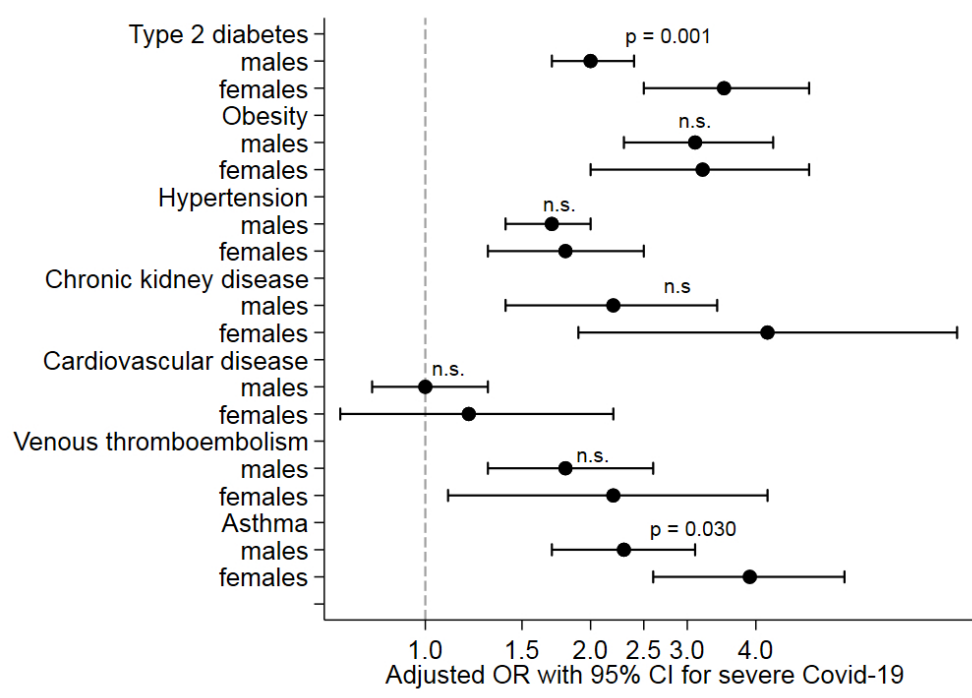

Associations of cardiometabolic risk factors with severe Covid-19 by sex (adjusted odds ratios with 95% Cis).

358x260mm (72 x 72 DPI)

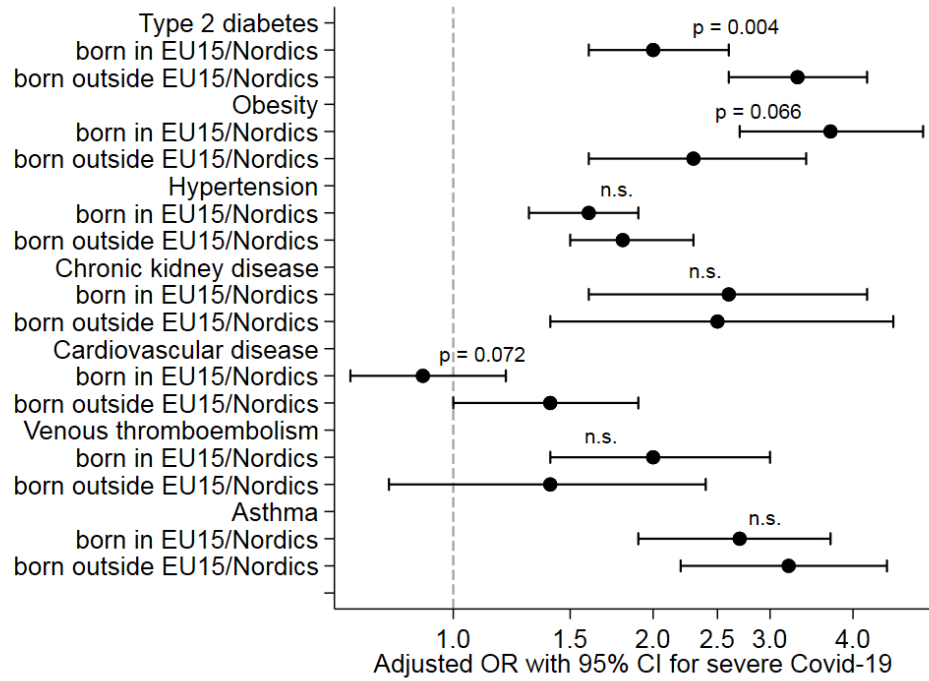

Associations of cardiometabolic risk factors with severe Covid-19 by region of birth \* (adjusted odds ratios with 95% CIs).

358x260mm (72 x 72 DPI)

1  
2  
3  
4  
5  
6  
7  
8  
9  
10  
11  
12  
13  
14  
15  
16  
17  
18  
19  
20  
21  
22  
23  
24  
25  
26  
27  
28  
29  
30  
31  
32  
33  
34  
35  
36  
37  
38  
39  
40  
41  
42  
43  
44  
45  
46  
47  
48  
49  
50  
51  
52  
53  
54  
55  
56  
57  
58  
59  
60

## Online Supplementary data

### Cardiometabolic factors and risk for severe COVID-19 requiring invasive mechanical ventilation during the Swedish epidemic

Svensson P, Hofmann R, Habel H, Jernberg T, Nordberg P

#### Table of contents

|                                                                                     |                                           |
|-------------------------------------------------------------------------------------|-------------------------------------------|
| Supplemental methods – register information .....                                   | 1                                         |
| eTable 1 – Hypertension definitions .....                                           | <b>Fel! Bokmärket är inte definierat.</b> |
| eTable 2 - Missing Data in the Study Population.....                                | 3                                         |
| eTable 3 - Baseline characteristics of the study population by age-group.....       | 4                                         |
| eTable 4 - Baseline characteristics of the study population by sex .....            | 5                                         |
| eTable 5 - Baseline characteristics of the study population by region of birth..... | 6                                         |
| Supplemental figure S1 - Directed Acyclic Graph.....                                | 7                                         |
| Supplemental Figure S2 – Exclusion flowchart.....                                   | 8                                         |

## Supplemental methods – register information

### *The Population Register*

The Population Register is managed by Statistics Sweden and includes information on deaths, emigration and immigration for the entire Swedish population. All residents are assigned a unique personal identity number that can be used for linkage of different data resources including several national health registers of high quality.

### *The longitudinal integrated database for health insurance and labor market studies (LISA)*

LISA is managed by Statistics Sweden and includes annual measurements on several socioeconomic and sociodemographic variables, including income, education and country of birth.

### *The Swedish Patient Register*

Swedish Patient Register is managed by the National Board of Health and Welfare and covers inpatient care since 1964- (nationwide since 1987) and non-primary outpatient care since 2001. The register is nationwide with a near complete coverage during the study period.

### *The Swedish Prescribed Drug Register*

The Swedish Prescribed Drug Register is managed by the National Board of Health and Welfare and started on July 1, 2005. The register covers all drugs except over-the-counter medication (which is not covered at all) and medications administered at hospitals (which is only covered to some extent in the Prescribed Drug Register and completely covered through the National Patient Register in some counties).



**eTable 1 – Hypertension definition.**

| Anti-hypertensive drugs             | ATC-codes          | Exclusion diagnosis (ICD-10)                                                                      |
|-------------------------------------|--------------------|---------------------------------------------------------------------------------------------------|
| Diuretics                           | C03A, C03D, C03E   |                                                                                                   |
| Beta-blockers *                     | C07A, C07F         | Angina pectoris (I208, I209)<br>Atrial fibrillation (I48)<br>MI (I21, I22)<br>Heart failure (I50) |
| Calcium channel blockers            | C08C, C08D         |                                                                                                   |
| ACE-inhibitors †                    | C09A, C09B         | Heart failure (I50)                                                                               |
| Angiotensin receptor blockers ‡     | C09C, C09DA, C09DB | Heart failure (I50)                                                                               |
| Other drugs targeting blood vessels | C02C, C02D         |                                                                                                   |

Patients with a pick-up of a prescription of the anti-hypertensive drugs within the preceding 12 months of the index date were considered as having hypertension. Beta-blockers, ACE-inhibitors, and Angiotensin receptor blockers may be prescribed for other diagnoses than hypertension. Patients were not classified as having hypertension if these drugs were found in combinations with any such diagnosis. An existing record of hypertension (I109) was superior to the pick-ups of prescribed drugs.

\* Patients with a diagnosis of angina pectoris (I208, I209), atrial fibrillation (I48), MI (I21, I22) or heart failure (I50) and simultaneously prescribed with beta-blockers were not classified as having hypertension.

† ‡ Patients with a diagnosis of heart failure (I50) with concurrently prescription of ACE inhibitors or angiotensin receptor blockers were not classified as having hypertension.

**eTable 2 - Missing Data \* in the Study Cohort**

| <b>Characteristic</b>  | <b>Missing data, No. (%)</b> |
|------------------------|------------------------------|
| Age                    | 0 (0.0)                      |
| Sex                    | 0 (0.0)                      |
| Level of education     | 239 (2.0)                    |
| Region of birth        | 5 (0.1)                      |
| Fills of prescriptions | 0 (0)                        |
| Medical history        | 0 (0)                        |

For peer review only

**eTable 3. Baseline characteristics of the study population by age-group.** Characteristics of patients with Covid-19 requiring mechanical ventilation and control subjects

|                                          | Age below median (62 years) |                                    | Age above median (62 years) |                                    |
|------------------------------------------|-----------------------------|------------------------------------|-----------------------------|------------------------------------|
|                                          | Covid-19<br>(n = 580)       | Control<br>subjects<br>(n = 5,800) | Covid-19<br>(n = 506)       | Control<br>subjects<br>(n = 5,600) |
| Age, median (IQR), y                     | 53 (47-59)                  | 53 (47-59)                         | 70 (66-75)                  | 70 (66-75)                         |
| <b>Sex:</b>                              |                             |                                    |                             |                                    |
| Male, No. (%)                            | 4,230 (72.9)                | 423 (72.9)                         | 390 (77.1)                  | 3,900 (77.1)                       |
| <b>Sociodemographics No. (%)</b>         |                             |                                    |                             |                                    |
| Education (years)                        |                             |                                    |                             |                                    |
| ≤9                                       | 131 (23.5)                  | 886 (15.6)                         | 149 (30.5)                  | 1,258 (25.2)                       |
| 10-12                                    | 258 (46.2)                  | 2,654 (46.7)                       | 208 (42.6)                  | 2,151 (43.2)                       |
| ≥12                                      | 169 (30.3)                  | 2,138 (37.7)                       | 131 (26.8)                  | 1,574 (31.6)                       |
| Marital status                           |                             |                                    |                             |                                    |
| Unmarried                                | 250 (43.1)                  | 3,000 (51.7)                       | 204 (40.3)                  | 2,219 (43.9)                       |
| Married                                  | 330 (56.9)                  | 2,800 (48.3)                       | 302 (59.7)                  | 2,841 (56.1)                       |
| Region of birth                          |                             |                                    |                             |                                    |
| EU 15* and/or Nordics                    | 271 (46.8)                  | 4,099 (70.7)                       | 325 (64.6)                  | 4,312 (85.2)                       |
| <b>Medical history No. (%)</b>           |                             |                                    |                             |                                    |
| Diabetes mellitus                        | 139 (24.0)                  | 430 (7.4)                          | 146 (28.9)                  | 864 (17.1)                         |
| Obesity                                  | 68 (11.7)                   | 186 (3.2)                          | 31 (6.1)                    | 142 (2.8)                          |
| Hypertension                             | 217 (37.4)                  | 1,269 (21.9)                       | 330 (65.2)                  | 2,989 (59.1)                       |
| Hyperlipidaemia                          | 43 (7.4)                    | 182 (3.1)                          | 86 (17.0)                   | 616 (12.2)                         |
| Chronic kidney disease                   | 20 (3.4)                    | 40 (0.7)                           | 20 (4.0)                    | 106 (2.1)                          |
| Cardiovascular disease                   | 32 (5.5)                    | 202 (3.5)                          | 73 (14.4)                   | 790 (15.6)                         |
| Myocardial infarction                    | 23 (4.0)                    | 119 (2.1)                          | 32 (6.3)                    | 440 (8.7)                          |
| Ischemic stroke                          | 6 (1.0)                     | 55 (0.9)                           | 23 (4.5)                    | 219 (4.3)                          |
| Peripheral artery disease                | 5 (0.9)                     | 51 (0.9)                           | 19 (3.8)                    | 198 (3.9)                          |
| Heart failure                            | 17 (2.9)                    | 57 (1.0)                           | 23 (4.5)                    | 272 (5.4)                          |
| Atrial fibrillation                      | 12 (2.1)                    | 93 (1.6)                           | 53 (10.5)                   | 496 (9.8)                          |
| Deep vein thrombosis                     | 16 (2.8)                    | 77 (1.3)                           | 24 (4.7)                    | 131 (2.6)                          |
| Pulmonary embolism                       | 2 (0.3)                     | 29 (0.5)                           | 24 (4.7)                    | 131 (2.6)                          |
| Chronic obstructive<br>pulmonary disease | 7 (1.2)                     | 46 (0.8)                           | 25 (4.9)                    | 191 (3.8)                          |
| Asthma                                   | 57 (9.8)                    | 176 (3.0)                          | 43 (8.5)                    | 200 (4.0)                          |
| Malignancy                               | 40 (6.9)                    | 476 (8.2)                          | 118 (23.3)                  | 1,264 (25.0)                       |
| Rheumatoid arthritis                     | 8 (1.4)                     | 39 (0.7)                           | 9 (1.8)                     | 57 (1.1)                           |
| Systemic inflammatory<br>disease         | 11 (1.9)                    | 29 (0.5)                           | 22 (4.3)                    | 100 (2.0)                          |
| Inflammatory bowel<br>disease            | 5 (0.9)                     | 81 (1.4)                           | 12 (2.4)                    | 78 (1.5)                           |

\* EU 15 comprises of Austria, Belgium, Denmark, Finland, France, Germany, Greece, Ireland, Italy, Luxembourg, Netherlands, Portugal, Spain, Sweden, United Kingdom. The Nordic countries include Denmark, Finland, Iceland, Norway, and Sweden.

**eTable 4. Baseline characteristics of the study population by sex.** Characteristics of patients with Covid-19 requiring mechanical ventilation and control subjects

|                                          | Males                 |                                    | Females               |                                    |
|------------------------------------------|-----------------------|------------------------------------|-----------------------|------------------------------------|
|                                          | Covid-19<br>(n = 813) | Control<br>subjects<br>(n = 8,130) | Covid-19<br>(n = 273) | Control<br>subjects<br>(n = 2,730) |
| Age, median (IQR), y                     | 62 (54-70)            | 62 (54-70)                         | 60 (50-68)            | 60 (50-68)                         |
| <b>Sociodemographics No. (%)</b>         |                       |                                    |                       |                                    |
| Education (years)                        |                       |                                    |                       |                                    |
| ≤9                                       | 204 (25.9)            | 1,678 (21.0)                       | 76 (29.5)             | 466 (17.3)                         |
| 10-12                                    | 351 (44.5)            | 3,606 (45.2)                       | 115 (44.6)            | 1,199 (44.6)                       |
| ≥12                                      | 233 (29.6)            | 2,691 (33.7)                       | 67 (26.0)             | 1,021 (38.0)                       |
| Marital status                           |                       |                                    |                       |                                    |
| Unmarried                                | 314 (38.6)            | 3,760 (46.2)                       | 140 (51.3)            | 1,459 (53.4)                       |
| Married                                  | 499 (61.4)            | 4,370 (53.8)                       | 133 (48.7)            | 1,271 (46.6)                       |
| Region of birth                          |                       |                                    |                       |                                    |
| EU 15* and/or Nordics                    | 439 (54.3)            | 6,250 (76.9)                       | 157 (57.5)            | 2,161 (79.2)                       |
| <b>Medical history No. (%)</b>           |                       |                                    |                       |                                    |
| Diabetes mellitus                        | 216 (26.6)            | 1,099 (13.5)                       | 69 (25.3)             | 195 (7.1)                          |
| Obesity                                  | 63 (7.7)              | 218 (2.7)                          | 36 (13.2)             | 110 (4.0)                          |
| Hypertension                             | 419 (51.5)            | 3,332 (41.0)                       | 128 (46.9)            | 926 (33.9)                         |
| Hyperlipidaemia                          | 103 (12.7)            | 667 (8.2)                          | 26 (9.5)              | 131 (4.8)                          |
| Chronic kidney disease                   | 26 (3.2)              | 121 (1.5)                          | 14 (5.1)              | 25 (0.9)                           |
| Cardiovascular disease                   | 91 (11.2)             | 877 (10.8)                         | 14 (5.1)              | 115 (4.2)                          |
| Myocardial infarction                    | 51 (6.3)              | 521 (6.4)                          | 4 (1.5)               | 38 (1.4)                           |
| Ischemic stroke                          | 22 (2.7)              | 225 (2.8)                          | 7 (2.6)               | 49 (1.8)                           |
| Peripheral artery disease                | 19 (2.3)              | 216 (2.7)                          | 5 (1.8)               | 33 (1.2)                           |
| Heart failure                            | 30 (3.7)              | 286 (3.5)                          | 10 (3.7)              | 43 (1.6)                           |
| Atrial fibrillation                      | 53 (6.5)              | 510 (6.3)                          | 12 (4.4)              | 79 (2.9)                           |
| Deep vein thrombosis                     | 31 (3.8)              | 163 (2.0)                          | 9 (3.3)               | 45 (1.6)                           |
| Pulmonary embolism                       | 9 (1.1)               | 81 (1.0)                           | 4 (1.5)               | 22 (0.8)                           |
| Chronic obstructive<br>pulmonary disease | 24 (3.0)              | 184 (2.3)                          | 8 (2.9)               | 53 (1.9)                           |
| Asthma                                   | 58 (7.1)              | 256 (3.1)                          | 42 (15.4)             | 120 (4.4)                          |
| Malignancy                               | 122 (15.0)            | 1,287 (15.8)                       | 36 (13.2)             | 453 (16.6)                         |
| Rheumatoid arthritis                     | 9 (1.1)               | 54 (0.7)                           | 8 (2.9)               | 42 (1.5)                           |
| Systemic inflammatory<br>disease         | 13 (1.6)              | 64 (0.8)                           | 20 (7.3)              | 65 (2.4)                           |
| Inflammatory bowel<br>disease            | 12 (1.5)              | 109 (1.3)                          | 5 (1.8)               | 50 (1.8)                           |

\* EU 15 comprises of Austria, Belgium, Denmark, Finland, France, Germany, Greece, Ireland, Italy, Luxembourg, Netherlands, Portugal, Spain, Sweden, United Kingdom. The Nordic countries include Denmark, Finland, Iceland, Norway, and Sweden.

**eTable 5. Baseline characteristics of the study population by region of birth.** Characteristics of patients with Covid-19 requiring mechanical ventilation and control subjects

|                                          | Region of birth within EU15/<br>and/or Nordic Countries |                                    | Region of birth outside EU15/<br>and/or Nordic Countries |                                    |
|------------------------------------------|---------------------------------------------------------|------------------------------------|----------------------------------------------------------|------------------------------------|
|                                          | Covid-19<br>(n = 596)                                   | Control<br>subjects<br>(n = 5,960) | Covid-19<br>(n = 490)                                    | Control<br>subjects<br>(n = 4,900) |
| Age, median (IQR), y                     | 64 (54-72)                                              | 64 (54-72)                         | 59 (51-67)                                               | 59 (51-67)                         |
| <b>Sex:</b>                              |                                                         |                                    |                                                          |                                    |
| Male, No. (%)                            | 439 (73.7)                                              | 4,390 (73.7)                       | 374 (76.3)                                               | 3,740 (76.3)                       |
| <b>Sociodemographics</b> No. (%)         |                                                         |                                    |                                                          |                                    |
| Education (years)                        |                                                         |                                    |                                                          |                                    |
| ≤9                                       | 121 (20.6)                                              | 1,161 (19.8)                       | 159 (34.6)                                               | 983 (20.5)                         |
| 10-12                                    | 295 (50.3)                                              | 2,636 (44.9)                       | 171 (37.3)                                               | 2,169 (45.2)                       |
| ≥12                                      | 171 (29.1)                                              | 2,069 (35.3)                       | 129 (28.1)                                               | 1,643 (34.3)                       |
| Marital status                           |                                                         |                                    |                                                          |                                    |
| Unmarried                                | 299 (50.2)                                              | 2,859 (48.0)                       | 155 (31.6)                                               | 2,360 (48.2)                       |
| Married                                  | 297 (49.8)                                              | 3,101 (52.0)                       | 335 (68.4)                                               | 2,540 (51.8)                       |
| <b>Medical history</b> No. (%)           |                                                         |                                    |                                                          |                                    |
| Diabetes mellitus                        | 128 (21.5)                                              | 699 (11.7)                         | 157 (32.0)                                               | 595 (12.1)                         |
| Obesity                                  | 60 (10.1)                                               | 170 (2.9)                          | 39 (8.0)                                                 | 158 (3.2)                          |
| Hypertension                             | 313 (52.5)                                              | 2,547 (42.7)                       | 234 (47.8)                                               | 1,711 (34.9)                       |
| Hyperlipidaemia                          | 75 (12.6)                                               | 496 (8.3)                          | 54 (11.0)                                                | 302 (6.2)                          |
| Chronic kidney disease                   | 21 (3.5)                                                | 83 (1.4)                           | 19 (3.9)                                                 | 63 (1.3)                           |
| Cardiovascular disease                   | 57 (9.6)                                                | 622 (10.4)                         | 48 (9.8)                                                 | 370 (7.6)                          |
| Myocardial infarction                    | 29 (4.9)                                                | 338 (5.7)                          | 26 (5.3)                                                 | 221 (4.5)                          |
| Ischemic stroke                          | 16 (2.7)                                                | 174 (2.9)                          | 13 (2.7)                                                 | 100 (2.0)                          |
| Peripheral artery disease                | 15 (2.5)                                                | 158 (2.7)                          | 9 (1.8)                                                  | 91 (1.9)                           |
| Heart failure                            | 21 (3.5)                                                | 192 (3.2)                          | 19 (3.9)                                                 | 137 (2.8)                          |
| Atrial fibrillation                      | 53 (8.9)                                                | 373 (6.3)                          | 12 (2.4)                                                 | 216 (4.4)                          |
| Deep vein thrombosis                     | 25 (4.2)                                                | 112 (1.9)                          | 15 (3.1)                                                 | 96 (2.0)                           |
| Pulmonary embolism                       | 8 (1.3)                                                 | 64 (1.1)                           | 5 (1.0)                                                  | 39 (0.8)                           |
| Chronic obstructive<br>pulmonary disease | 18 (3.0)                                                | 125 (2.1)                          | 14 (2.9)                                                 | 112 (2.3)                          |
| Asthma                                   | 53 (8.9)                                                | 212 (3.6)                          | 47 (9.6)                                                 | 164 (3.3)                          |
| Malignancy                               | 105 (17.6)                                              | 1,075 (18.0)                       | 53 (10.8)                                                | 665 (13.6)                         |
| Rheumatoid arthritis                     | 9 (1.5)                                                 | 64 (1.1)                           | 8 (1.6)                                                  | 32 (0.7)                           |
| Systemic inflammatory<br>disease         | 21 (3.5)                                                | 77 (1.3)                           | 12 (2.4)                                                 | 52 (1.1)                           |
| Inflammatory bowel<br>disease            | 14 (2.3)                                                | 89 (1.5)                           | 3 (0.6)                                                  | 70 (1.4)                           |

\* EU 15 comprises of Austria, Belgium, Denmark, Finland, France, Germany, Greece, Ireland, Italy, Luxembourg, Netherlands, Portugal, Spain, Sweden, United Kingdom. The Nordic countries include Denmark, Finland, Iceland, Norway, and Sweden.

Supplemental Fig. S1 – Directed Acyclic Graph

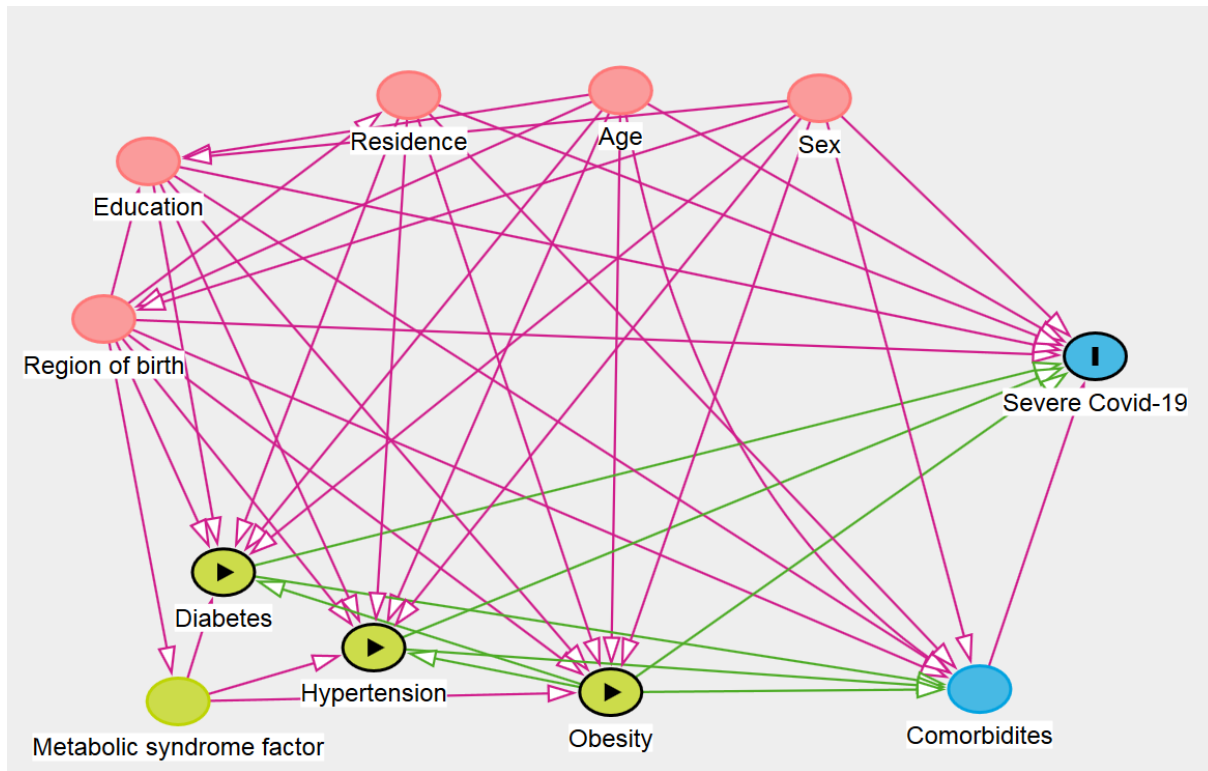

review only

## Supplemental Fig. S2 - Flow chart of exclusion criteria

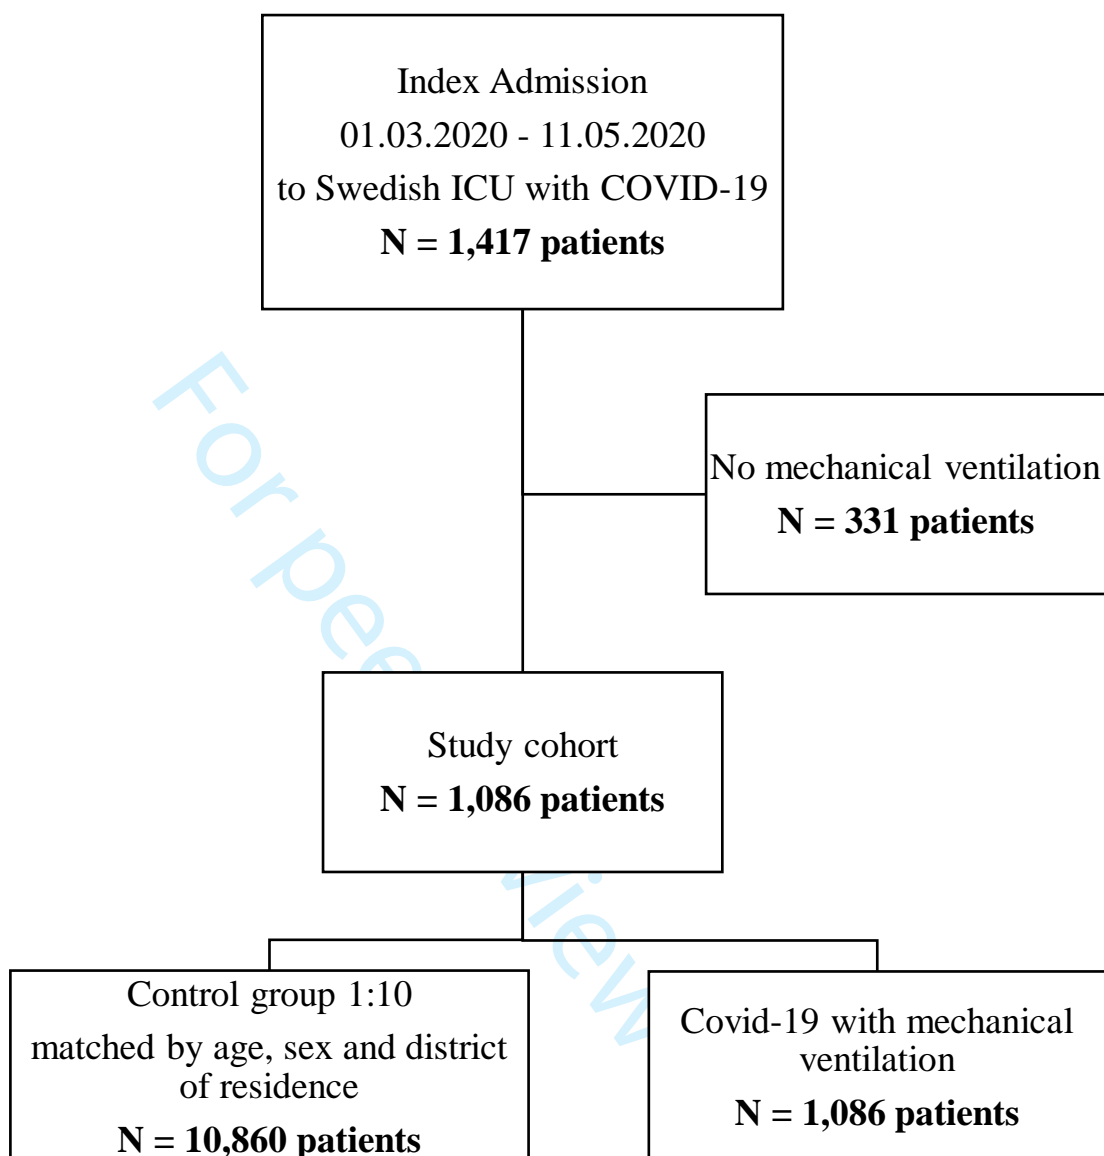

STROBE Statement—Checklist of items that should be included in reports of *case-control studies*

|                              | Item No | Recommendation                                                                                                                                                                                    | Page No         |
|------------------------------|---------|---------------------------------------------------------------------------------------------------------------------------------------------------------------------------------------------------|-----------------|
| <b>Title and abstract</b>    | 1       | (a) Indicate the study's design with a commonly used term in the title or the abstract                                                                                                            | 2               |
|                              |         | (b) Provide in the abstract an informative and balanced summary of what was done and what was found                                                                                               | 2               |
| <b>Introduction</b>          |         |                                                                                                                                                                                                   |                 |
| Background/rationale         | 2       | Explain the scientific background and rationale for the investigation being reported                                                                                                              | 5               |
| Objectives                   | 3       | State specific objectives, including any prespecified hypotheses                                                                                                                                  | 6               |
| <b>Methods</b>               |         |                                                                                                                                                                                                   |                 |
| Study design                 | 4       | Present key elements of study design early in the paper                                                                                                                                           | 6               |
| Setting                      | 5       | Describe the setting, locations, and relevant dates, including periods of recruitment, exposure, follow-up, and data collection                                                                   | 6               |
| Participants                 | 6       | (a) Give the eligibility criteria, and the sources and methods of case ascertainment and control selection. Give the rationale for the choice of cases and controls                               | 6               |
|                              |         | (b) For matched studies, give matching criteria and the number of controls per case                                                                                                               | 6               |
| Variables                    | 7       | Clearly define all outcomes, exposures, predictors, potential confounders, and effect modifiers. Give diagnostic criteria, if applicable                                                          | 7,8             |
| Data sources/<br>measurement | 8*      | For each variable of interest, give sources of data and details of methods of assessment (measurement). Describe comparability of assessment methods if there is more than one group              | 7               |
| Bias                         | 9       | Describe any efforts to address potential sources of bias                                                                                                                                         | 9               |
| Study size                   | 10      | Explain how the study size was arrived at                                                                                                                                                         | 6               |
| Quantitative variables       | 11      | Explain how quantitative variables were handled in the analyses. If applicable, describe which groupings were chosen and why                                                                      | 8               |
| Statistical methods          | 12      | (a) Describe all statistical methods, including those used to control for confounding                                                                                                             | 8               |
|                              |         | (b) Describe any methods used to examine subgroups and interactions                                                                                                                               | 8               |
|                              |         | (c) Explain how missing data were addressed                                                                                                                                                       | 8               |
|                              |         | (d) If applicable, explain how matching of cases and controls was addressed                                                                                                                       | 8               |
|                              |         | (e) Describe any sensitivity analyses                                                                                                                                                             |                 |
| <b>Results</b>               |         |                                                                                                                                                                                                   |                 |
| Participants                 | 13*     | (a) Report numbers of individuals at each stage of study—eg numbers potentially eligible, examined for eligibility, confirmed eligible, included in the study, completing follow-up, and analysed | Suppl Figure S2 |
|                              |         | (b) Give reasons for non-participation at each stage                                                                                                                                              | Suppl Figure S2 |
|                              |         | (c) Consider use of a flow diagram                                                                                                                                                                | Suppl Figure S2 |
| Descriptive data             | 14*     | (a) Give characteristics of study participants (eg demographic, clinical, social) and information on exposures and potential confounders                                                          | 9               |



1  
2  
3  
4  
5  
6  
7  
8  
9  
10  
11  
12  
13  
14  
15  
16  
17  
18  
19  
20  
21  
22  
23  
24  
25  
26  
27  
28  
29  
30  
31  
32  
33  
34  
35  
36  
37  
38  
39  
40  
41  
42  
43  
44  
45  
46  
47  
48  
49  
50  
51  
52  
53  
54  
55  
56  
57  
58  
59  
60

|              |     |                                                                                     |         |
|--------------|-----|-------------------------------------------------------------------------------------|---------|
|              |     | (b) Indicate number of participants with missing data for each variable of interest | Etable2 |
| Outcome data | 15* | Report numbers in each exposure category, or summary measures of exposure           | Table 2 |

For peer review only

|    |                          |    |                                                                                                                                                                                                              |
|----|--------------------------|----|--------------------------------------------------------------------------------------------------------------------------------------------------------------------------------------------------------------|
| 1  |                          |    |                                                                                                                                                                                                              |
| 2  |                          |    |                                                                                                                                                                                                              |
| 3  |                          |    |                                                                                                                                                                                                              |
| 4  | Main results             | 16 | (a) Give unadjusted estimates and, if applicable, confounder-adjusted estimates and their precision (eg, 95% confidence interval). Make clear which confounders were adjusted for and why they were included |
| 5  |                          |    |                                                                                                                                                                                                              |
| 6  |                          |    |                                                                                                                                                                                                              |
| 7  |                          |    | (b) Report category boundaries when continuous variables were categorized                                                                                                                                    |
| 8  |                          |    |                                                                                                                                                                                                              |
| 9  |                          |    | (c) If relevant, consider translating estimates of relative risk into absolute risk for a meaningful time period                                                                                             |
| 10 |                          |    |                                                                                                                                                                                                              |
| 11 | Other analyses           | 17 | Report other analyses done—eg analyses of subgroups and interactions, and sensitivity analyses                                                                                                               |
| 12 |                          |    |                                                                                                                                                                                                              |
| 13 |                          |    |                                                                                                                                                                                                              |
| 14 |                          |    |                                                                                                                                                                                                              |
| 15 | <b>Discussion</b>        |    |                                                                                                                                                                                                              |
| 16 | Key results              | 18 | Summarise key results with reference to study objectives                                                                                                                                                     |
| 17 |                          |    |                                                                                                                                                                                                              |
| 18 | Limitations              | 19 | Discuss limitations of the study, taking into account sources of potential bias or imprecision. Discuss both direction and magnitude of any potential bias                                                   |
| 19 |                          |    |                                                                                                                                                                                                              |
| 20 | Interpretation           | 20 | Give a cautious overall interpretation of results considering objectives, limitations, multiplicity of analyses, results from similar studies, and other relevant evidence                                   |
| 21 |                          |    |                                                                                                                                                                                                              |
| 22 |                          |    |                                                                                                                                                                                                              |
| 23 | Generalisability         | 21 | Discuss the generalisability (external validity) of the study results                                                                                                                                        |
| 24 |                          |    |                                                                                                                                                                                                              |
| 25 | <b>Other information</b> |    |                                                                                                                                                                                                              |
| 26 | Funding                  | 22 | Give the source of funding and the role of the funders for the present study and, if applicable, for the original study on which the present article is based                                                |
| 27 |                          |    |                                                                                                                                                                                                              |
| 28 |                          |    |                                                                                                                                                                                                              |
| 29 |                          |    |                                                                                                                                                                                                              |
| 30 |                          |    |                                                                                                                                                                                                              |
| 31 |                          |    |                                                                                                                                                                                                              |
| 32 |                          |    |                                                                                                                                                                                                              |
| 33 |                          |    |                                                                                                                                                                                                              |
| 34 |                          |    |                                                                                                                                                                                                              |
| 35 |                          |    |                                                                                                                                                                                                              |
| 36 |                          |    |                                                                                                                                                                                                              |
| 37 |                          |    |                                                                                                                                                                                                              |
| 38 |                          |    |                                                                                                                                                                                                              |
| 39 |                          |    |                                                                                                                                                                                                              |
| 40 |                          |    |                                                                                                                                                                                                              |
| 41 |                          |    |                                                                                                                                                                                                              |
| 42 |                          |    |                                                                                                                                                                                                              |
| 43 |                          |    |                                                                                                                                                                                                              |
| 44 |                          |    |                                                                                                                                                                                                              |
| 45 |                          |    |                                                                                                                                                                                                              |
| 46 |                          |    |                                                                                                                                                                                                              |
| 47 |                          |    |                                                                                                                                                                                                              |
| 48 |                          |    |                                                                                                                                                                                                              |
| 49 |                          |    |                                                                                                                                                                                                              |
| 50 |                          |    |                                                                                                                                                                                                              |
| 51 |                          |    |                                                                                                                                                                                                              |
| 52 |                          |    |                                                                                                                                                                                                              |
| 53 |                          |    |                                                                                                                                                                                                              |
| 54 |                          |    |                                                                                                                                                                                                              |
| 55 |                          |    |                                                                                                                                                                                                              |
| 56 |                          |    |                                                                                                                                                                                                              |
| 57 |                          |    |                                                                                                                                                                                                              |
| 58 |                          |    |                                                                                                                                                                                                              |
| 59 |                          |    |                                                                                                                                                                                                              |
| 60 |                          |    |                                                                                                                                                                                                              |

\*Give information separately for cases and controls.

**Note:** An Explanation and Elaboration article discusses each checklist item and gives methodological background and published examples of transparent reporting. The STROBE checklist is best used in conjunction with this article (freely available on the Web sites of PLoS Medicine at <http://www.plosmedicine.org/>, Annals of Internal Medicine at <http://www.annals.org/>, and Epidemiology at <http://www.epidem.com/>). Information on the STROBE Initiative is available at <http://www.strobe-statement.org>.

# BMJ Open

## Association between cardiometabolic disease and severe Covid-19: a nationwide case-control study of patients requiring invasive mechanical ventilation

|                                 |                                                                                                                                                                                                                                                                                                                                                                                                                          |
|---------------------------------|--------------------------------------------------------------------------------------------------------------------------------------------------------------------------------------------------------------------------------------------------------------------------------------------------------------------------------------------------------------------------------------------------------------------------|
| Journal:                        | <i>BMJ Open</i>                                                                                                                                                                                                                                                                                                                                                                                                          |
| Manuscript ID                   | bmjopen-2020-044486.R1                                                                                                                                                                                                                                                                                                                                                                                                   |
| Article Type:                   | Original research                                                                                                                                                                                                                                                                                                                                                                                                        |
| Date Submitted by the Author:   | 19-Dec-2020                                                                                                                                                                                                                                                                                                                                                                                                              |
| Complete List of Authors:       | Svensson, Per; Karolinska Institutet Department of Clinical Science and Education Sodersjukhuset, Hofmann, Robin; Karolinska Institute, Department of Clinical Science and Education, Södersjukhuset Häbel, Henrike; Institute of Environmental Medicine Jernberg, Tomas; Danderyd University Hospital, Karolinska Institutet Nordberg, Per; Karolinska institutet, Dept. of Cardiology, Centre for Reuscitation Science |
| <b>Primary Subject Heading</b>: | Infectious diseases                                                                                                                                                                                                                                                                                                                                                                                                      |
| Secondary Subject Heading:      | Cardiovascular medicine, Diabetes and endocrinology, Intensive care                                                                                                                                                                                                                                                                                                                                                      |
| Keywords:                       | COVID-19, Diabetes & endocrinology < INTERNAL MEDICINE, Hypertension < CARDIOLOGY, INTENSIVE & CRITICAL CARE                                                                                                                                                                                                                                                                                                             |
|                                 |                                                                                                                                                                                                                                                                                                                                                                                                                          |

SCHOLARONE™  
Manuscripts



I, the Submitting Author has the right to grant and does grant on behalf of all authors of the Work (as defined in the below author licence), an exclusive licence and/or a non-exclusive licence for contributions from authors who are: i) UK Crown employees; ii) where BMJ has agreed a CC-BY licence shall apply, and/or iii) in accordance with the terms applicable for US Federal Government officers or employees acting as part of their official duties; on a worldwide, perpetual, irrevocable, royalty-free basis to BMJ Publishing Group Ltd ("BMJ") its licensees and where the relevant Journal is co-owned by BMJ to the co-owners of the Journal, to publish the Work in this journal and any other BMJ products and to exploit all rights, as set out in our [licence](#).

The Submitting Author accepts and understands that any supply made under these terms is made by BMJ to the Submitting Author unless you are acting as an employee on behalf of your employer or a postgraduate student of an affiliated institution which is paying any applicable article publishing charge ("APC") for Open Access articles. Where the Submitting Author wishes to make the Work available on an Open Access basis (and intends to pay the relevant APC), the terms of reuse of such Open Access shall be governed by a Creative Commons licence – details of these licences and which [Creative Commons](#) licence will apply to this Work are set out in our licence referred to above.

Other than as permitted in any relevant BMJ Author's Self Archiving Policies, I confirm this Work has not been accepted for publication elsewhere, is not being considered for publication elsewhere and does not duplicate material already published. I confirm all authors consent to publication of this Work and authorise the granting of this licence.

1  
2  
3  
4  
5  
6  
7  
8  
9  
10  
11  
12  
13  
14  
15  
16  
17  
18  
19  
20  
21  
22  
23  
24  
25  
26  
27  
28  
29  
30  
31  
32  
33  
34  
35  
36  
37  
38  
39  
40  
41  
42  
43  
44  
45  
46  
47  
48  
49  
50  
51  
52  
53  
54  
55  
56  
57  
58  
59  
60

## Association between cardiometabolic disease and severe Covid-19: a nationwide case-control study of patients requiring invasive mechanical ventilation

Per Svensson, MD, PhD<sup>1,2</sup>; Robin Hofmann, MD, PhD<sup>1,2</sup>; Henrike Häbel, PhD<sup>3</sup>; Tomas Jernberg, MD, PhD<sup>4</sup>; and Per Nordberg, MD, PhD<sup>5,2</sup>

1. Department of Clinical Science and Education, Södersjukhuset, Karolinska Institutet, Stockholm, Sweden
2. Department of Cardiology, Södersjukhuset, Stockholm, Sweden
3. Institute of Environmental Medicine, Division of Biostatistics, Karolinska Institutet, Stockholm, Sweden
4. Department of Clinical Sciences, Danderyd University Hospital, Karolinska Institutet, Stockholm, Sweden
5. Department of Medicine Solna, Karolinska Institutet, Stockholm, Sweden

**Word count:** 4624

**Correspondence to:** Per Svensson

Assoc. Prof, MD, FESC

Department of Clinical Science and Education, Södersjukhuset, Karolinska Institutet

Department of Cardiology, Södersjukhuset

Sjukhusbacken 10, SE 118 83 Stockholm, Sweden. +46 (0)8 616 3014

Email: [per.svensson@ki.se](mailto:per.svensson@ki.se)

Twitter: [@perpersvensson](https://twitter.com/perpersvensson)

## ABSTRACT

### Aims:

The risks associated with diabetes, obesity and hypertension for severe Covid-19 may be confounded and differ by sociodemographic background. We assessed the risks associated with cardiometabolic factors for severe Covid-19 when accounting for socioeconomic factors and in subgroups by age, sex and region of birth.

### Methods and results

In this nationwide case-control study, 1,086 patients admitted to intensive care with Covid-19 requiring mechanical ventilation (cases) and 10,860 population-based controls matched for age, sex and district of residency were included from mandatory national registries. Odds Ratios (ORs) with 95% confidence intervals (CIs) for associations between severe Covid-19 and exposures with adjustment for confounders were estimated using logistic regression. The median age was 62 years (IQR 52-70), and 3,003 (24.9%) were female. Type 2 diabetes (OR, 2.3 [95% CI, 1.9-2.7]), hypertension (OR, 1.7 [95% CI, 1.5-2.0]), obesity (OR, 3.1 [95% CI, 2.4-4.0]) and chronic kidney disease (OR, 2.5 [95% CI, 1.7-3.7]) were all associated with severe Covid-19. In the younger subgroup (below 57 years) ORs were significantly higher for all cardiometabolic risk factors. The risk associated with type 2 diabetes was higher in women ( $p=0.001$ ) and in patients with a region of birth outside EU ( $p=0.004$ ).

### Conclusion

Diabetes, obesity and hypertension were all independently associated with severe Covid-19 with stronger associations in the younger population. Type 2 diabetes implied a greater risk among women and in non-EU immigrants. These findings, originating from high-quality

1  
2  
3 Swedish registries, may be important to direct preventive measures such as vaccination to  
4  
5 susceptible patient groups.  
6  
7  
8  
9

10 **Trial registration:** Clinicaltrial.gov (NCT04426084)  
11  
12  
13  
14  
15  
16  
17  
18  
19  
20  
21  
22  
23  
24  
25  
26  
27  
28  
29  
30  
31  
32  
33  
34  
35  
36  
37  
38  
39  
40  
41  
42  
43  
44  
45  
46  
47  
48  
49  
50  
51  
52  
53  
54  
55  
56  
57  
58  
59  
60

For peer review only

## STRENGTH AND LIMITATIONS OF THIS STUDY

- In contrast to many previous reports, this study accounts for severity of Covid-19 and provides a homogeneous study group, by only including intubated patients at the intensive care with the highest risk of death. By inclusion of virtually all such cases nationwide, in a country with a tax-financed health care and a serious epidemic during the study period, the study provides a large sample size with adequate power and high external validity.
- This study compared severe Covid-19 patients with matched controls in the underlying population and used 10 population-based, age, sex and district of residence matched controls per each case. Therefore, the study can provide estimates of relative risk for severe Covid-19 in the population for the studied risk factors.
- Socioeconomic factors have been crucial in how the pandemic has impacted on different groups in the society but are also closely linked with obesity, diabetes and cardiovascular disease. By matching for district of residence and adjusting for individual level data on several socioeconomic variables this study confirms previous studies but also provides novel evidence that diabetes, obesity and hypertension are independently associated with severe Covid-19, and how the relative importance of risk factors differs by age, sex and region of birth.
- The data on exposures are from high quality national registries and the patient cohort is the most complete Swedish cohort on severe Covid-19 published to date. The findings may be important to direct preventive measures such as vaccination to susceptible patient groups.
- A possible limitation is that the outcome did not include patients where admission to intensive care and/or mechanical ventilation was not considered appropriate and those



1  
2  
3 who died before intensive care, another limitation is the lack of information on  
4  
5 smoking status.  
6  
7  
8  
9  
10  
11  
12  
13  
14  
15  
16  
17  
18  
19  
20  
21  
22  
23  
24  
25  
26  
27  
28  
29  
30  
31  
32  
33  
34  
35  
36  
37  
38  
39  
40  
41  
42  
43  
44  
45  
46  
47  
48  
49  
50  
51  
52  
53  
54  
55  
56  
57  
58  
59  
60

For peer review only

## INTRODUCTION

Observational data suggest both a higher prevalence, and a more severe course of corona virus disease 2019 (Covid-19) among individuals with diabetes<sup>1,2</sup>, obesity<sup>3</sup> and hypertension,<sup>4-8</sup> risk factors that are closely linked and cluster together in the metabolic syndrome.<sup>9</sup> As more clinical data are emerging, new determinants of both Covid-19 and severity of disease are being discussed, such as coagulation disorders<sup>10</sup> and socio-economic factors<sup>11</sup> but to this point the underlying mechanisms that link cardiometabolic disease with severe Covid-19 remain unclear.<sup>12</sup>

In order to advance the knowledge on risk factors, several aspects are crucial to put evidence into perspective: First, the spectrum of disease severity needs to be addressed as the clinical presentation of infected patients can range from asymptomatic, to severe with high risk of fatal outcome. As the risks of being infected may differ from the risk of becoming severely ill once infected, there is a need for studies that focus on risk factors associated with a severe disease. Second, as socio-economic and cultural factors are closely linked to type 2 diabetes, obesity and cardiovascular disease, these need to be accounted for in such analyses. And, most importantly, prevalent cases need to be compared to controls to reliably assess the magnitude of the major risk factors in the underlying population.<sup>13</sup> Currently only a few population-based studies have investigated the association between cardiometabolic risk factors and covid-19 death<sup>1,2,14</sup>. To our knowledge, no study has investigated whether cardiometabolic risk factors are independently associated with severe Covid-19 requiring intensive care, when controlled for age, sex, sociodemographic factors, and immigrant background using matched population-based controls. In addition, it is unknown whether the impact of these risk factors is attenuated by age, sex and sociodemographic factors.

1  
2  
3 Sweden has been hit hard by the Covid-19 epidemic but in contrast to most other countries,  
4 did not employ a strict lock-down policy. To continuously evaluate the situation, strong  
5 governmental efforts were enforced on national health care registries for data reporting.  
6  
7  
8  
9  
10 In this study we present a comprehensive Swedish sample originating from mandatory, high-  
11 quality national registries with the aim to investigate whether cardiometabolic risk factors are  
12 associated with severe Covid-19 in patients treated at the intensive care unit with invasive  
13 mechanical ventilation.  
14  
15  
16  
17  
18  
19  
20  
21  
22

## 23 **METHODS**

### 24 **Study design and ethics**

25  
26 This nationwide case-control study was based on data from the Swedish Intensive Care  
27 Registry (SIR) on patients (cases) with severe Covid-19 admitted to the ICU requiring  
28 invasive mechanical ventilation between 1<sup>st</sup> of March until 11<sup>th</sup> of May 2020. For each case,  
29 10 controls were randomly selected from the Swedish Population Register and matched by  
30 age, sex and district of residence (corresponding to part of municipality). The study database  
31 was merged with multiple mandatory Swedish national registries at Statistics Sweden and the  
32 National Board of Health and Welfare, which are further described in supplemental methods,  
33 using each individual's unique personal identification number.<sup>15</sup> The study complied with the  
34 Declaration of Helsinki, was approved by the National Ethical Review Board (identification  
35 number 2020/124-31/4) and registered at Clinicaltrial.gov (NCT04426084). The study used  
36 already collected, pseudonymized data and involved minimal infringement of personal  
37 integrity.  
38  
39  
40  
41  
42  
43  
44  
45  
46  
47  
48  
49  
50  
51  
52  
53  
54

### 55 **Patient and Public Involvement**

1  
2  
3 Patients and the public were not involved in the design or conduct of our research.  
4  
5  
6

### 7 **National registries and Data collection**

8  
9  
10 Severe COVID-19 was defined as laboratory confirmed COVID-19 infection in individuals  
11  
12 treated at the intensive care unit (ICU) with mechanical ventilation. These cases were reported  
13  
14 to SIR<sup>16</sup> which is a national register with about 95% coverage of all ICU admissions in  
15  
16 Sweden and was used to identify eligible patients. The National Patient Register<sup>17</sup> was used to  
17  
18 collect primary or secondary diagnoses from previous hospital admissions and outpatients'  
19  
20 visits coded according to the International Classification of Diseases (ICD) version 10 within  
21  
22 the 15 years preceding the admission. The Prescribed Drugs Register contains information on  
23  
24 all dispensed drugs according to the Anatomical Therapeutic Chemical Classification (ATC).  
25  
26 We collected individual data on dispensed drugs prescribed and claimed within 12 months  
27  
28 before the study period. The longitudinal integrated database for health insurance and labor  
29  
30 market studies is managed by Statistics Sweden and includes annual measurements on several  
31  
32 socioeconomic and sociodemographic variables, including income, education and country of  
33  
34 birth.<sup>18</sup>  
35  
36  
37  
38  
39  
40  
41

### 42 **Definition of Exposures**

43  
44 Exposures were a history of cardiometabolic or relevant chronic disease based on diagnoses  
45  
46 in the National Patient Register within 15 years preceding the admission or prescribed drugs  
47  
48 within the preceding 12 months. Hypertension (defined as previous diagnosis of ICD I10 or  
49  
50 prescription of antihypertensive drugs as described previously<sup>19</sup>), hyperlipidemia (ICD E78 or  
51  
52 prescription of lipid lowering drugs), diabetes mellitus type 2 (ICD E11 or prescription of  
53  
54 antidiabetic drugs), diabetes mellitus type 1 (ICD E10), obesity (ICD E66), heart failure (ICD  
55  
56 I50.1, I50.9), atrial fibrillation (ICD I48), venous thromboembolism (ICD I26, I80), asthma  
57  
58  
59  
60

1  
2  
3 (ICD J45), chronic obstructive pulmonary disease (ICD J44), chronic kidney disease (ICD  
4  
5 N18), malignancy (ICD C, D40-48), rheumatoid arthritis (ICD M05, M06), systemic  
6  
7 inflammatory disease (ICD M30-M36), and inflammatory bowel disease (ICD K50, K51)  
8  
9 were included. A history of cardiovascular disease (CVD) was defined as a record of either  
10  
11 MI (ICD I21, I22), ischemic heart disease (ICD I25), ischemic stroke (ICD I63), or peripheral  
12  
13 vascular disease (ICD I70-I73), in the Swedish Patient Register (Supplementary eTable1).  
14  
15  
16  
17  
18

### 19 **Definition of covariates and variables for subgroup analyses**

20  
21 Level of education was categorized as  $\leq 9$  years (reference), 10-12 years, and  $>12$  years based  
22  
23 on the highest educational level attained during the year before admission. Region of birth  
24  
25 was categorized as a country of birth within EU15 (Austria, Belgium, Denmark, Finland,  
26  
27 France, Germany, Greece, Ireland, Italy, Luxembourg, Netherlands, Portugal, Spain, Sweden,  
28  
29 United Kingdom) and/or the Nordic Countries (Denmark, Finland, Iceland, Norway,  
30  
31 Sweden), or having a country of birth outside this region. Marital status during the year before  
32  
33 index date was categorized as married or not married which included unmarried, divorced,  
34  
35 and widowed. Subgroup analyses were performed for region of birth, sex (male/female) and  
36  
37 age tertiles.  
38  
39  
40  
41  
42  
43  
44

### 45 **Outcome**

46  
47 The outcome was defined as an ICU admission due to Covid-19 (with a laboratory confirmed  
48  
49 Sars-Cov2 infection), registered in SIR, with at least one episode of invasive mechanical  
50  
51 ventilation during the ICU stay. All eligible patients during the study period between 1<sup>st</sup> of  
52  
53 March until 11<sup>th</sup> of May 2020 were included as cases in the study. In a sensitivity analysis the  
54  
55 outcome was defined as any ICU admission due to Covid-19 (with a laboratory confirmed  
56  
57 Sars-Cov2 infection), registered in SIR during the study period.  
58  
59  
60

## Statistical Methods

Categorical variables are reported as frequencies and percentages, while continuous variables are reported as median and interquartile range (IQR). Missing data are reported in Supplemental eTable 2. Odds ratios (OR) and 95% confidence intervals (CI) for the association between the different exposures and the outcome were calculated by means of logistic regression adjusted for age and sex (Model 1). For all exposures additional adjustments were made for sociodemographic and socioeconomic variables (marital status, region of birth and educational level) (Model 2) and, finally, for all conditions listed in the paragraph exposures above that were used as covariates in a fully adjusted regression model (Model 3) in order to analyse both total effects unconfounded of sociodemographic variables and direct effects in accordance to our perception of causal relationships as illustrated by the directed acyclic graphs in supplementary figure S1. Standard errors were calculated using the robust sandwich estimator and the significance level was set at an alpha of 0.05. For a formal test of a significant difference between the ORs for different subgroups, likelihood-ratio tests were conducted between a model with and without an interaction term between the indicator variable for the subgroup and the risk factor. For these tests, the robust sandwich estimator was not used in the underlying logistic regression models.

Statistical analyses were performed using Stata version 16.0 (StataCorp, College Station, TX).

## RESULTS

During the study period between 1<sup>st</sup> of March until 11<sup>th</sup> of May 2020, a total of 1,417 patients were admitted to an intensive care unit in Sweden due to Covid-19 out of which 1,086 required treatment with invasive mechanical ventilation (cases). For each case, 10 matched control subjects were randomly selected, rendering a total of 10,860 control subjects. The study population selection procedure and reasons for exclusions are described in Supplemental Figure S2.

### Patient characteristics

The median age was 62 (IQR 52-70) years and 75% were men. Baseline characteristics are summarized in Table 1a. Patients were less likely to have a post-secondary education and more likely to be married compared to the control group. Further, patients were more likely to have history of migration with more patients having a region of birth outside EU15 and the Nordic countries. Comorbid conditions were more common among patients with Covid-19 receiving mechanical ventilation compared to the control group. In particular, cardiometabolic risk factors were overrepresented with more patients having a history of hypertension, hyperlipidemia, diabetes mellitus, obesity and chronic kidney disease, but also venous thromboembolic disease, asthma and systemic inflammatory diseases were more common. Due to more comorbid conditions, patients had correspondingly more pharmacological treatments (table 1b). All antihypertensive treatments were more common among patients compared to controls subjects as were all antidiabetic treatments except meglitinides.

### Comparison of risk factors and treatments between patient with severe Covid-19 and controls

1  
2  
3 In the multivariable logistic regression models presented in table 2a, both type 2 diabetes  
4 (OR, 2.7 [95% CI, 2.3-3.2]), hypertension (OR, 1.8 [95% CI, 1.5-2.0]), hyperlipidemia (OR,  
5 1.4 [95% CI, 1.2-1.6]), obesity (OR, 3.2 [95% CI, 2.6-4.1]) and chronic kidney disease (OR,  
6 2.8 [95% CI, 2.0-4.0]) were associated with Covid-19 receiving mechanical ventilation. All  
7 associations remained significant after adjustment for possible socioeconomic confounders. In  
8 the fully adjusted model, all cardiometabolic risk factors except hyperlipidemia were  
9 associated with the outcome indicating direct and additive effects for these risk factors (figure  
10 1). In addition, we observed associations between a history of venous thromboembolic disease  
11 (OR, 1.7 [95% CI, 1.3-2.4]), asthma (OR, 2.8 [95% CI, 2.3-3.6]), rheumatoid arthritis (OR,  
12 1.8 [95% CI, 1.1-3.0]), as well as systemic inflammatory disease (OR, 2.6 [95% CI, 1.8-3.9])  
13 and severe Covid-19. In contrast, neither cardiovascular disease, heart failure, atrial  
14 fibrillation, malignancy, chronic obstructive pulmonary disease or inflammatory bowel  
15 disease were associated with the outcome.  
16  
17  
18  
19  
20  
21  
22  
23  
24  
25  
26  
27  
28  
29  
30  
31  
32  
33  
34

35 In the logistic regression analysis adjusted for age and sex using no treatment as reference, all  
36 types of antihypertensive treatment, except diuretics and all types of antidiabetic treatments,  
37 except meglinitides, were associated with severe Covid-19 (table 2b). However, when  
38 adjusting for all comorbidities in the fully adjusted model, calcium-channel blockers,  
39 biguanides and glitazones were the only treatments which remained associated with the  
40 outcome.  
41  
42  
43  
44  
45  
46  
47  
48  
49  
50

### 51 **Subgroup analysis**

52 Baseline characteristics by subgroups of age, sex and region of birth are summarized in  
53 supplemental eTable 3, eTable 4 and eTable 5 respectively. A regression analysis for the  
54 cardiometabolic risk factors is presented in table 3 by subgroups of age(tertiles), sex and  
55 region of birth. In the younger subgroup (aged 21-56 years), odds ratios were significantly  
56  
57  
58  
59  
60



1  
2  
3 higher for hypertension (OR, 2.6 [95% CI, 2.0-3.3]), type 2 diabetes (OR, 4.5 [95% CI, 3.3-  
4 6.2]), obesity (OR, 7.6 [95% CI, 5.3-11.0]), chronic kidney disease (OR, 7.7 [95% CI, 3.4-  
5 17.5]) (p=0.010), venous thromboembolic disease (OR, 3.9 [95% CI, 2.0-7.6]), asthma (OR,  
6 4.9 [95% CI, 3.3-7.3]), systemic inflammatory disease (OR, 6.7[95% CI, 3.0-14.9]) and heart  
7 failure (OR, 5.4[95% CI, 2.4-12.2]) as illustrated in figure 2. In women, the odds ratios for  
8 type 2 diabetes and asthma were significantly higher as compared to men (figure 3). Among  
9 patients with a region of birth outside EU 15, diabetes had a stronger association with severe  
10 Covid-19 compared to patients with a region of birth within EU15, whereas a trend towards  
11 the opposite was observed for obesity (figure 4).

### 12 13 14 15 16 17 18 19 20 21 22 23 24 25 26 **Sensitivity analysis**

27 In a sensitivity analysis, we report any Covid-19 related ICU-admission (with or without  
28 mechanical ventilation) as the outcome (eTable 6) which was found in a total of 1417  
29 patients. Associations with cardiometabolic risk factors were similar but positive associations  
30 were also observed with heart failure (OR, 1.6 [95% CI, 1.2-2.1]), atrial fibrillation (OR, 1.5  
31 [95% CI, 1.2-1.9]) and chronic obstructive pulmonary disease (OR, 1.9 [95% CI, 1.4-2.5])  
32  
33  
34  
35  
36  
37  
38  
39  
40  
41  
42  
43  
44  
45  
46  
47  
48  
49  
50  
51  
52  
53  
54  
55  
56  
57  
58  
59  
60

## DISCUSSION

In the present nationwide case-control study, assessing the risk for severe Covid-19 with need for mechanical ventilation at the intensive care unit, we found that the cardiometabolic risk factors diabetes, obesity and hypertension, were strongly and independently associated with severe infection also when accounting for socioeconomic factors. Furthermore, we found higher risks associated with all cardiometabolic risk factors among younger patients whereas diabetes was more important in women and in those with an immigrant background. These findings, originating from high-quality national registries in Sweden which has been experiencing a serious epidemic, confirm and extend findings from previous studies and may be important to identify susceptible patient groups requiring extra precautions and prioritized for vaccination.

Cardiometabolic risk factors were early linked with a severe Covid-19 in case-series<sup>20</sup> and uncontrolled studies<sup>21</sup>, later in studies using population-based control subjects.<sup>5</sup> and nationwide studies based on data from electronic health records<sup>1,2,14</sup>. Here, we confirm these findings and extend them in a well-controlled design and can reinforce that diabetes, obesity and hypertension - risk factors that are closely linked and often cluster together in the metabolic syndrome<sup>22</sup> - all have strong and independent direct associations with the outcome. By adjusting for sociodemographic factors collected on individual level, we can also show that obesity and other components of the metabolic syndrome - factors that are closely linked with lower socioeconomic status<sup>23</sup> - act on Covid-19 independent of sociodemography. The effect of diabetes was even stronger in the population with immigrant background.

Initial studies on hypertension as a risk factor for severe disease<sup>24</sup> may have been confounded by age and until now, there has been limited evidence of hypertension being an independent

1  
2  
3 risk factor.<sup>25</sup> In a large nationwide study from the UK on risk factors for death in Covid-19,<sup>1</sup>  
4 hypertension was positively associated with the outcome when adjusted for age and sex, but it  
5  
6 was no longer a risk factor when other comorbid conditions were accounted in the fully  
7  
8 adjusted model. In another large study in patient with type 2 diabetes, antihypertensive  
9  
10 treatment was independently associated with Covid-19 related mortality.<sup>14</sup> Here, we can  
11  
12 report that hypertension is not only a risk factor independent of age and other related  
13  
14 conditions, but also that risk factor patterns differ by age, sex, and region of birth. In the  
15  
16 younger subgroup (age below 57 years) all cardiometabolic factors had an even stronger  
17  
18 association with severe Covid-19. In women and individuals born outside EU 15, diabetes had  
19  
20 the strongest association with the outcome. All components of metabolic syndrome are  
21  
22 associated with endothelial dysfunction<sup>26</sup> and low-grade inflammation.<sup>27</sup> Hypertension is also  
23  
24 linked with a dysregulated immune system,<sup>28</sup> including endothelial mechanisms,<sup>29</sup> and is  
25  
26 causally associated with increased lymphocyte count.<sup>30</sup> As emerging evidence suggests that  
27  
28 endothelial inflammation is involved in serious manifestations of Covid-19,<sup>31</sup> it is possible  
29  
30 that a common mechanism linking cardiometabolic risk factors with severe Covid-19 is  
31  
32 mediated through endothelial and microcirculatory dysfunction. Our findings suggest that  
33  
34 these mechanisms are even more important at a younger age. Therefore, a more detailed  
35  
36 metabolic phenotyping that includes biomarkers of subclinical inflammation and insulin  
37  
38 resistance may be important to identify younger patients at the highest risk and further studies  
39  
40 are warranted in this field.<sup>3</sup>  
41  
42  
43  
44  
45  
46  
47  
48  
49  
50

51 We identified asthma, previous thromboembolic disease, rheumatoid arthritis, and systemic  
52  
53 inflammatory disease as additional chronic diseases with increased risk for a severe course of  
54  
55 Covid-19. This is new and important information as patients with chronic inflammatory  
56  
57 conditions may also be more susceptible to the proinflammatory pathways of the infection  
58  
59  
60

1  
2  
3 that involves diffuse endothelial inflammation and systemic impaired microcirculation  
4  
5 leading to multiorgan dysfunction.<sup>27</sup>  
6  
7  
8  
9

10 The association between socioeconomic factors and cardiovascular disease is well  
11 established<sup>23</sup> and socioeconomic factors have also been important during the Covid-19-  
12 pandemic.<sup>32 33</sup> We therefore believe that matching for residency, which is linked with  
13 socioeconomic factors, as well as adjustments for individual level information on migration,  
14 level of education and marital status, is a crucial factor in our study design.  
15  
16  
17  
18  
19  
20  
21  
22

23 In comparison to several previous descriptive studies, we have a well-characterised,  
24 homogenous, nationwide population with severe disease, all needing mechanical ventilation at  
25 the intensive care unit. To the best of our knowledge, this is the first study that includes  
26 virtually all cases with this type of severe disease nationwide together with a population based  
27 matched control group. In addition, some previous studies include a heterogeneous mix of  
28 cases where other factors such as testing patterns in mild cases may have influenced overall  
29 results.<sup>5</sup> Consequently, the current study estimated relative risks in the population for  
30 developing severe Covid-19 which may differ from the risk of obtaining an infection with a  
31 milder course of disease. Since Swedish health care is virtually fully tax funded, all acute  
32 treatments including admission to the ICU with invasive mechanical ventilation, are based on  
33 medical decisions and do not involve private-economic considerations. Unequal access to  
34 health care is thereby reduced, increasing the validity of our results. In addition, vast  
35 resources were put to scale up ICU-resources due to the pandemic which resulted in a  
36 nationwide surplus of ICU-beds during the study period. However, there are some limitations  
37 with the present study. It is possible that intensive care treatment with mechanical ventilation  
38 was not considered appropriate in some patients with multiple comorbidities or severe frailty,  
39  
40  
41  
42  
43  
44  
45  
46  
47  
48  
49  
50  
51  
52  
53  
54  
55  
56  
57  
58  
59  
60

1  
2  
3 thus our results may underestimate associations with severe Covid-19 for these conditions.  
4  
5 Although the indication for early mechanical ventilation in severe Covid-19 has changed  
6  
7 somewhat as the pandemic evolved, we think this will have limited impact on our results  
8  
9 since we only included the first two months of the first wave in which the indication was  
10  
11 rather stable. Further, in terms of external validity, patient selection for intensive care  
12  
13 treatment including invasive ventilation may differ between countries,<sup>34</sup> however, it is  
14  
15 unlikely that this will affect the relative importance of risk factors. We did not have any  
16  
17 information on smoking or concerning the rate of mild infection with Covid-19 among control  
18  
19 subjects. Finally, the observational design of the study cannot exclude the potential of residual  
20  
21 confounding and the results should be interpreted as such.  
22  
23  
24  
25  
26  
27  
28  
29  
30  
31  
32  
33  
34  
35  
36  
37  
38  
39  
40  
41  
42  
43  
44  
45  
46  
47  
48  
49  
50  
51  
52  
53  
54  
55  
56  
57  
58  
59  
60

## CONCLUSIONS

Diabetes, obesity and hypertension were all independently associated with severe Covid-19 requiring mechanical ventilation at the intensive care unit, with strongest associations in the younger population. Type 2 diabetes implied a greater risk among women and in those with immigrant background. These findings, originating from high-quality Swedish registries, may be important to direct preventive measures such as vaccination to susceptible patient groups.

For peer review only

## ACKNOWLEDGMENTS

We thank Maria Ioanna Kotopouli, Karolinska Institutet, for expert statistical support.

### Funding

This work was supported by grants from the Region Stockholm (ALF-project, grant number 2019-0100).

RH was supported by Region Stockholm (clinical postdoctoral appointment, grant number K 2017-4577) and the Swedish Heart Lung foundation (grant number 20180187)

### Authors' contributions

PS had full access to all the data in the study and takes full responsibility for the integrity of the data and accuracy of the data analysis.

*Study concept and design:* PS, PN, HH.

*Acquisition of data:* PS

*Analysis and interpretation of data:* PS, RH, TJ, PN, HH

*Drafting the manuscript:* PS, RH, PN.

*Critical revision of the manuscript for important intellectual content:* PS, RH, TJ, PN, HH

*Statistical analysis:* HH.

*Obtained funding:* PS

### Disclosures

The authors declare that there is no conflict of interest.

**Data availability**

The data underlying this article cannot be shared publicly due to the privacy of individuals that participated in the study. The data will be shared on reasonable request to the corresponding author.

For peer review only



**REFERENCES**

1. Williamson EJ, Walker AJ, Bhaskaran K, et al. Factors associated with COVID-19-related death using OpenSAFELY. *Nature*. 2020;584(7821):430-436.
2. Barron E, Bakhai C, Kar P, et al. Associations of type 1 and type 2 diabetes with COVID-19-related mortality in England: a whole-population study. *The lancet Diabetes & endocrinology*. 2020;8(10):813-822.
3. Stefan N, Birkenfeld AL, Schulze MB, Ludwig DS. Obesity and impaired metabolic health in patients with COVID-19. *Nature reviews Endocrinology*. 2020;16(7):341-342.
4. Zhou F, Yu T, Du R, et al. Clinical course and risk factors for mortality of adult inpatients with COVID-19 in Wuhan, China: a retrospective cohort study. *Lancet (London, England)*. 2020.
5. Mancina G, Rea F, Ludergnani M, Apolone G, Corrao G. Renin–Angiotensin–Aldosterone System Blockers and the Risk of Covid-19. *New England Journal of Medicine*. 2020.
6. Fosbol EL, Butt JH, Ostergaard L, et al. Association of Angiotensin-Converting Enzyme Inhibitor or Angiotensin Receptor Blocker Use With COVID-19 Diagnosis and Mortality. *JAMA*. 2020.
7. Petrilli CM, Jones SA, Yang J, et al. Factors associated with hospital admission and critical illness among 5279 people with coronavirus disease 2019 in New York City: prospective cohort study. *BMJ*. 2020;369:m1966.
8. Sattar N, McInnes IB, McMurray JJV. Obesity a Risk Factor for Severe COVID-19 Infection: Multiple Potential Mechanisms. *Circulation*. 2020.
9. Stefan N. Causes, consequences, and treatment of metabolically unhealthy fat distribution. *The Lancet Diabetes & Endocrinology*. 2020;8(7):616-627.

10. Becker RC. COVID-19 update: Covid-19-associated coagulopathy. *J Thromb Thrombolysis*. 2020;50(1):54-67.
11. Pareek M, Bangash MN, Pareek N, et al. Ethnicity and COVID-19: an urgent public health research priority. *Lancet*. 2020;395(10234):1421-1422.
12. Bornstein SR, Rubino F, Khunti K, et al. Practical recommendations for the management of diabetes in patients with COVID-19. *The Lancet Diabetes & Endocrinology*. 2020;8(6):546-550.
13. Lipsitch M, Swerdlow DL, Finelli L. Defining the Epidemiology of Covid-19 - Studies Needed. *The New England journal of medicine*. 2020;382(13):1194-1196.
14. Holman N, Knighton P, Kar P, et al. Risk factors for COVID-19-related mortality in people with type 1 and type 2 diabetes in England: a population-based cohort study. *The lancet Diabetes & endocrinology*. 2020;8(10):823-833.
15. Ludvigsson JF, Otterblad-Olausson P, Pettersson BU, Ekblom A. The Swedish personal identity number: possibilities and pitfalls in healthcare and medical research. *European Journal of Epidemiology*. 2009;24(11):659-667.
16. Swedish registry for Intensive Care. National Quality Registry for Intensive Care. <http://kvalitetsregister.se/englishpages/findaregistry/registerarkivenglish/nationalqualityregistryforintensivecaresir.2175.html> .
17. Ludvigsson JF, Andersson E, Ekblom A, et al. External review and validation of the Swedish national inpatient register. *BMC Public Health*. 2011;11:450.
18. Ludvigsson JF, Svedberg P, Olén O, Bruze G, Neovius M. The longitudinal integrated database for health insurance and labour market studies (LISA) and its use in medical research. *European Journal of Epidemiology*. 2019;34(4):423-437.

- 1  
2  
3 19. Oras P, Habel H, Skoglund PH, Svensson P. Elevated Blood Pressure in the  
4  
5 Emergency Department: A Risk Factor for Incident Cardiovascular Disease.  
6  
7 *Hypertension (Dallas, Tex : 1979)*. 2020;75(1):229-236.  
8  
9
- 10 20. Wang D, Hu B, Hu C, et al. Clinical Characteristics of 138 Hospitalized Patients With  
11  
12 2019 Novel Coronavirus–Infected Pneumonia in Wuhan, China. *JAMA*.  
13  
14 2020;323(11):1061-1069.  
15  
16
- 17 21. Grasselli G, Zangrillo A, Zanella A, et al. Baseline Characteristics and Outcomes of  
18  
19 1591 Patients Infected With SARS-CoV-2 Admitted to ICUs of the Lombardy Region,  
20  
21 Italy. *JAMA*. 2020;323(16):1574-1581.  
22  
23
- 24 22. Torpy JM, Lynm C, Glass RM. The Metabolic Syndrome. *JAMA*. 2006;295(7):850-  
25  
26 850.  
27
- 28 23. Schultz WM, Kelli HM, Lisko JC, et al. Socioeconomic Status and Cardiovascular  
29  
30 Outcomes. *Circulation*. 2018;137(20):2166-2178.  
31  
32
- 33 24. Gao C, Cai Y, Zhang K, et al. Association of hypertension and antihypertensive  
34  
35 treatment with COVID-19 mortality: a retrospective observational study. *European*  
36  
37 *Heart Journal*. 2020;41(22):2058-2066.  
38  
39
- 40 25. Kreutz R, Algharably EAE, Azizi M, et al. Hypertension, the renin-angiotensin  
41  
42 system, and the risk of lower respiratory tract infections and lung injury: implications  
43  
44 for COVID-19. *Cardiovasc Res*. 2020.  
45  
46
- 47 26. Tziomalos K, Athyros VG, Karagiannis A, Mikhailidis DP. Endothelial dysfunction in  
48  
49 metabolic syndrome: prevalence, pathogenesis and management. *Nutrition,*  
50  
51 *metabolism, and cardiovascular diseases : NMCD*. 2010;20(2):140-146.  
52  
53
- 54 27. Hotamisligil GS. Inflammation and metabolic disorders. *Nature*. 2006;444(7121):860-  
55  
56 867.  
57  
58  
59  
60

- 1  
2  
3 28. Drummond GR, Vinh A, Guzik TJ, Sobey CG. Immune mechanisms of hypertension.  
4  
5 *Nature reviews Immunology*. 2019;19(8):517-532.  
6  
7  
8 29. Loperena R, Van Beusecum JP, Itani HA, et al. Hypertension and increased  
9  
10 endothelial mechanical stretch promote monocyte differentiation and activation: roles  
11  
12 of STAT3, interleukin 6 and hydrogen peroxide. *Cardiovasc Res*. 2018;114(11):1547-  
13  
14 1563.  
15  
16 30. Siedlinski M, Jozefczuk E, Xu X, et al. White Blood Cells and Blood Pressure: A  
17  
18 Mendelian Randomization Study. *Circulation*. 2020;141(16):1307-1317.  
19  
20  
21 31. Pons S, Fodil S, Azoulay E, Zafrani L. The vascular endothelium: the cornerstone of  
22  
23 organ dysfunction in severe SARS-CoV-2 infection. *Critical care (London, England)*.  
24  
25 2020;24(1):353.  
26  
27  
28 32. Price-Haywood EG, Burton J, Fort D, Seoane L. Hospitalization and Mortality among  
29  
30 Black Patients and White Patients with Covid-19. *New England Journal of Medicine*.  
31  
32 2020;382(26):2534-2543.  
33  
34  
35 33. Lassale C, Gaye B, Hamer M, Gale CR, Batty GD. Ethnic disparities in hospitalisation  
36  
37 for COVID-19 in England: The role of socioeconomic factors, mental health, and  
38  
39 inflammatory and pro-inflammatory factors in a community-based cohort study.  
40  
41 *Brain, behavior, and immunity*. 2020.  
42  
43  
44 34. Rhodes A, Ferdinande P, Flaatten H, Guidet B, Metnitz PG, Moreno RP. The  
45  
46 variability of critical care bed numbers in Europe. *Intensive care medicine*.  
47  
48 2012;38(10):1647-1653.  
49  
50  
51  
52  
53  
54  
55  
56  
57  
58  
59  
60

## FIGURE LEGENDS

**Figure 1. Associations of cardiometabolic risk factors with severe Covid-19 (adjusted odds ratios with 95% Cis).**

†Adjusted for age, sex, educational level, marital status and region of birth.

‡Adjusted for age, sex, educational level, marital status, region of birth and all diagnoses in table 2a

**Figure 2. Associations of cardiometabolic risk factors with severe Covid-19 by tertiles of age (adjusted odds ratios with 95% Cis).**

**Figure 3. Associations of cardiometabolic risk factors with severe Covid-19 by sex (adjusted odds ratios with 95% Cis).**

P-values denote likelihood-ratio tests between a model with and one without an interaction term between the indicator variable for the subgroup and the risk factor added to model 2

**Figure 4. Associations of cardiometabolic risk factors with severe Covid-19 by region of birth \* (adjusted odds ratios with 95% Cis).**

\*EU 15 comprises of Austria, Belgium, Denmark, Finland, France, Germany, Greece, Ireland, Italy, Luxembourg, Netherlands, Portugal, Spain, Sweden, United Kingdom. The Nordic countries include Denmark, Finland, Iceland, Norway, and Sweden.

P-values denote likelihood-ratio tests between a model with and one without an interaction term between the indicator variable for the subgroup and the risk factor added to model 2

**APPENDICES**

Appendix A. Online Supplementary data

Supplemental methods – register information. 1

eTable 1 – Hypertension definitions. 2

eTable 2 - Missing Data in the Study Population. 3

eTable 3a-c - Baseline characteristics of the study population by age-group. 4-6

eTable 4 - Baseline characteristics of the study population by sex. 7

eTable 5. Baseline characteristics of the study population by region of birth. 8

eTable 6 - Odds ratios for Covid-19 requiring ICU-admission by cardiometabolic factors and other comorbidities (n=1,417 cases and n=14,170 control subjects) 9

Supplemental Figure S1 – Directed Acyclic Graph. 7

Supplemental Figure S2 - Exclusion flowchart. 8

**Table 1a. Baseline characteristics of the study population.** Characteristics of patients with COVID-19 requiring mechanical ventilation and control subjects

|                                       | <b>COVID-19<br/>(n = 1,086)</b> | <b>Control subjects<br/>(n = 10,860)</b> |
|---------------------------------------|---------------------------------|------------------------------------------|
| Age, median (IQR), y                  | 62.0 (52.0-70.0)                | 62.0 (52.0-70.0)                         |
| <b>Sex:</b>                           |                                 |                                          |
| Male, No. (%)                         | 813 (74.9)                      | 8,130 (74.9)                             |
| <b>Sociodemographics No. (%)</b>      |                                 |                                          |
| Education (years)                     |                                 |                                          |
| ≤9                                    | 280 (26.8)                      | 2,144 (20.1)                             |
| 10-12                                 | 466 (44.6)                      | 4,805 (45.1)                             |
| ≥12                                   | 300 (28.7)                      | 3,712 (34.8)                             |
| Marital status                        |                                 |                                          |
| Widow                                 | 41 (3.8)                        | 405 (3.7)                                |
| Married                               | 632 (58.2)                      | 5,641 (51.9)                             |
| Single                                | 218 (20.1)                      | 2,802 (25.8)                             |
| Separated                             | 195 (18.0)                      | 2,012 (18.5)                             |
| Region of birth                       |                                 |                                          |
| EU 15* and/or Nordics                 | 596 (55.1)                      | 8,411 (77.5)                             |
| <b>Medical history No. (%)</b>        |                                 |                                          |
| Type 1 diabetes                       | 9 (0.8)                         | 39 (0.4)                                 |
| Type 2 diabetes                       | 276 (25.4)                      | 1,255 (11.6)                             |
| Obesity                               | 99 (9.1)                        | 328 (3.0)                                |
| Hypertension                          | 547 (50.4)                      | 4,258 (39.2)                             |
| Hyperlipidaemia                       | 292 (33.0)                      | 2,100 (28.6)                             |
| Chronic kidney disease                | 40 (3.7)                        | 146 (1.3)                                |
| Cardiovascular disease                | 105 (9.7)                       | 992 (9.1)                                |
| Myocardial infarction                 | 55 (5.1)                        | 559 (5.1)                                |
| Ischemic stroke                       | 29 (2.7)                        | 274 (2.5)                                |
| Peripheral artery disease             | 24 (2.2)                        | 249 (2.3)                                |
| Heart failure                         | 40 (3.7)                        | 329 (3.0)                                |
| Atrial fibrillation                   | 65 (6.0)                        | 589 (5.4)                                |
| Deep vein thrombosis                  | 40 (3.7)                        | 208 (1.9)                                |
| Pulmonary embolism                    | 13 (1.2)                        | 103 (0.9)                                |
| Chronic obstructive pulmonary disease | 32 (2.9)                        | 237 (2.2)                                |
| Asthma                                | 100 (9.2)                       | 376 (3.5)                                |
| Malignancy                            | 158 (14.5)                      | 1,740 (16.0)                             |
| Rheumatoid arthritis                  | 17 (1.6)                        | 96 (0.9)                                 |
| Systemic inflammatory disease         | 33 (3.0)                        | 129 (1.2)                                |
| Inflammatory bowel disease            | 17 (1.6)                        | 159 (1.5)                                |

\*EU 15 comprises of Austria, Belgium, Denmark, Finland, France, Germany, Greece, Ireland, Italy, Luxembourg, Netherlands, Portugal, Spain, Sweden, United Kingdom. The Nordic countries include Denmark, Finland, Iceland, Norway, and Sweden.

**Table 1b. Pharmacological treatments of the study population.**

|                                    | <b>Covid-19<br/>(n = 1,086)</b> | <b>Control subjects<br/>(n = 10,860)</b> |
|------------------------------------|---------------------------------|------------------------------------------|
| <b>Treatments No. (%)</b>          |                                 |                                          |
| <i>Antihypertensive treatments</i> |                                 |                                          |
| ACE inhibitors                     | 168 (15.5)                      | 1,310 (12.1)                             |
| ARBs                               | 218 (20.1)                      | 1,694 (15.6)                             |
| Calcium-channel blockers           | 239 (22.0)                      | 1,648 (15.2)                             |
| Beta-blockers                      | 222 (20.4)                      | 1,849 (17.0)                             |
| Diuretics                          | 51 (4.7)                        | 522 (4.8)                                |
| <i>Antidiabetic treatments</i>     |                                 |                                          |
| Any antidiabetics                  | 240 (22.1)                      | 1,144 (10.5)                             |
| Insulins                           | 80 (7.4)                        | 391 (3.6)                                |
| Biguanides                         | 200 (18.4)                      | 855 (7.9)                                |
| Sulfonylureas                      | 28 (2.6)                        | 93 (0.9)                                 |
| Glitazons                          | 6 (0.6)                         | 10 (0.1)                                 |
| DPP-4 inhibitors                   | 44 (4.1)                        | 210 (1.9)                                |
| GLP-1 RAs                          | 37 (3.4)                        | 184 (1.7)                                |
| SGLT-2 inhibitors                  | 46 (4.2)                        | 184 (1.7)                                |
| Meglitinides                       | 4 (0.4)                         | 34 (0.3)                                 |
| Statins                            | 288 (26.5)                      | 2,242 (20.6)                             |
| Aspirin                            | 136 (12.5)                      | 1,103 (10.2)                             |
| Other Antiplatelet drugs           | 20 (1.8)                        | 234 (2.2)                                |
| Warfarin                           | 17 (1.6)                        | 150 (1.4)                                |
| NOAC                               | 45 (4.1)                        | 474 (4.4)                                |

Abbreviations: ACE-inhibitors, angiotensin converting enzyme-inhibitors; ARBs, angiotensin receptor blockers; DPP-4 inhibitors, dipeptidyl peptidase-4 inhibitors; GLP-1 RAs, glucagon-like peptide-1 receptor agonists; SGLT2 inhibitors, sodium-glucose cotransporter-2 inhibitors  
NOAC, new oral anticoagulants



**Table 2a.** Odds ratios for Covid-19 requiring mechanical ventilation by cardiometabolic factors and other comorbidities.

| Risk factors           | Adjusted for age and sex |           |         | Adjusted model 2† |           |         | Adjusted model 3 ‡ |           |         |
|------------------------|--------------------------|-----------|---------|-------------------|-----------|---------|--------------------|-----------|---------|
|                        | OR                       | 95% CI    | p-value | OR                | 95% CI    | p-value | OR                 | 95% CI    | p-value |
| Type 1 diabetes        | 2.32                     | 1.12-4.81 | 0.023   | 3.13              | 1.52-6.42 | 0.002   | 2.56               | 1.25-5.24 | 0.010   |
| Type 2 diabetes        | 2.73                     | 2.33-3.20 | <0.001  | 2.25              | 1.90-2.65 | <0.001  | 1.81               | 1.49-2.19 | <0.001  |
| Obesity                | 3.23                     | 2.56-4.08 | <0.001  | 3.13              | 2.43-4.02 | <0.001  | 2.03               | 1.55-2.65 | <0.001  |
| Hypertension           | 1.76                     | 1.52-2.05 | <0.001  | 1.73              | 1.48-2.01 | <0.001  | 1.26               | 1.05-1.51 | <0.013  |
| Hyperlipidaemia        | 1.35                     | 1.15-1.58 | <0.001  | 1.22              | 1.03-1.43 | <0.018  | 0.90               | 0.75-1.09 | 0.286   |
| CKD                    | 2.83                     | 1.97-4.05 | <0.001  | 2.51              | 1.69-3.70 | <0.001  | 1.84               | 1.21-2.82 | 0.005   |
| CVD                    | 1.07                     | 0.86-1.33 | 0.554   | 1.03              | 0.82-1.29 | 0.789   | 0.75               | 0.58-0.96 | 0.022   |
| Heart failure          | 1.23                     | 0.87-1.73 | 0.236   | 1.13              | 0.79-1.62 | 0.48    | 0.78               | 0.51-1.19 | 0.253   |
| Atrial fibrillation    | 1.11                     | 0.85-1.46 | 0.43    | 1.24              | 0.93-1.64 | 0.136   | 1.04               | 0.75-1.43 | 0.819   |
| VTE                    | 1.74                     | 1.27-2.39 | 0.001   | 1.90              | 1.37-2.62 | <0.001  | 1.65               | 1.18-2.31 | 0.004   |
| COPD                   | 1.37                     | 0.94-1.99 | 0.105   | 1.34              | 0.91-1.97 | 0.133   | 0.87               | 0.56-1.36 | 0.552   |
| Asthma                 | 2.84                     | 2.26-3.58 | <0.001  | 2.78              | 2.18-3.53 | <0.001  | 2.25               | 1.74-2.90 | <0.001  |
| Malignancy             | 0.89                     | 0.74-1.06 | 0.195   | 0.97              | 0.80-1.17 | 0.725   | 0.85               | 0.70-1.04 | 0.103   |
| Rheumatoid arthritis   | 1.79                     | 1.06-3.00 | 0.029   | 1.86              | 1.11-3.12 | 0.019   | 1.27               | 0.72-2.23 | 0.407   |
| Systemic infl. disease | 2.65                     | 1.79-3.92 | <0.001  | 2.57              | 1.71-3.86 | <0.001  | 1.96               | 1.28-2.99 | 0.002   |
| Infl. bowel disease    | 1.07                     | 0.65-1.77 | 0.792   | 1.21              | 0.72-2.03 | 0.479   | 0.94               | 0.54-1.64 | 0.839   |

†Adjusted for age, sex, educational level, marital status and region of birth.

‡Adjusted for age, sex, educational level, marital status and region of birth and all diagnoses in table 2a

1  
2  
3  
4  
5  
6  
7  
8  
9  
10  
11  
12  
13  
14  
15  
16  
17  
18  
19  
20  
21  
22  
23  
24  
25  
26  
27  
28  
29  
30  
31  
32  
33  
34  
35  
36  
37  
38  
39  
40  
41  
42  
43  
44  
45  
46  
47  
48  
49  
50  
51  
52  
53  
54  
55  
56  
57  
58  
59  
60

**Abbreviations** CVD, cardiovascular disease; VTE, venous thromboembolism; COPD, chronic obstructive pulmonary disease; CKD, chronic kidney disease.

For peer review only

**Table 2b.** Odds ratios for Covid-19 requiring mechanical ventilation by pharmacological treatments.

| Treatments                         | Adjusted for age and sex |           |         | Adjusted model 2† |           |         | Adjusted model 3 ‡ |           |         |
|------------------------------------|--------------------------|-----------|---------|-------------------|-----------|---------|--------------------|-----------|---------|
|                                    | OR                       | 95% CI    | p-value | OR                | 95% CI    | p-value | OR                 | 95% CI    | p-value |
| <i>Antihypertensive treatments</i> |                          |           |         |                   |           |         |                    |           |         |
| ACE-inhibitors                     | 1.35                     | 1.13-1.62 | 0.001   | 1.35              | 1.12-1.62 | 0.797   | 0.99               | 0.81-1.22 | 0.931   |
| ARBs                               | 1.39                     | 1.18-1.64 | <0.001  | 1.47              | 1.24-1.75 | <0.001  | 1.07               | 0.88-1.30 | 0.474   |
| CCBs                               | 1.64                     | 1.39-1.93 | <0.001  | 1.64              | 1.39-1.93 | <0.001  | 1.25               | 1.03-1.52 | 0.025   |
| Beta-blockers                      | 1.28                     | 1.08-1.51 | 0.004   | 1.27              | 1.07-1.51 | 0.007   | 0.90               | 0.73-1.11 | 0.345   |
| Diuretics                          | 0.98                     | 0.72-1.32 | 0.870   | 1.00              | 0.74-1.36 | 0.996   | 0.74               | 0.53-1.03 | 0.078   |
| <i>Antidiabetic treatments</i>     |                          |           |         |                   |           |         |                    |           |         |
| Insulins                           | 2.15                     | 1.67-2.77 | <0.001  | 1.90              | 1.46-2.47 | <0.001  | 0.85               | 0.62-1.16 | 0.305   |
| Biguanides                         | 2.72                     | 2.28-3.24 | <0.001  | 2.26              | 1.88-2.72 | <0.001  | 1.40               | 1.01-1.94 | 0.044   |
| Sulfonylureas                      | 3.08                     | 2.01-4.73 | <0.001  | 2.13              | 1.33-3.41 | 0.002   | 1.17               | 0.72-1.91 | 0.530   |
| Glitazons                          | 6.03                     | 2.19-16.6 | 0.001   | 5.46              | 1.98-15.0 | 0.001   | 2.86               | 1.04-7.85 | 0.042   |
| DPP-4 inhibitors                   | 2.16                     | 1.54-3.01 | <0.001  | 1.77              | 1.25-2.50 | 0.001   | 0.91               | 0.62-1.33 | 0.632   |
| GLP-1 RA                           | 2.79                     | 1.92-4.03 | <0.001  | 2.71              | 1.85-3.97 | <0.001  | 1.24               | 0.82-1.87 | 0.312   |
| SGLT-2 inhibitors                  | 2.58                     | 1.85-3.59 | <0.001  | 2.30              | 1.63-3.25 | <0.001  | 1.20               | 0.82-1.74 | 0.346   |
| Meglitinides                       | 1.18                     | 0.42-3.33 | 0.383   | 1.03              | 0.36-2.96 | 0.953   | 0.55               | 0.19-1.61 | 0.276   |
| Statins                            | 1.44                     | 1.23-1.69 | <0.001  | 1.32              | 1.12-1.55 | 0.001   | 0.84               | 0.63-1.13 | 0.247   |
| Aspirin                            | 1.29                     | 1.05-1.57 | 0.013   | 1.14              | 0.93-1.41 | 0.200   | 0.97               | 0.75-1.24 | 0.791   |
| Warfarin                           | 1.14                     | 0.68-1.90 | 0.622   | 1.29              | 0.76-2.17 | 0.347   | 0.96               | 0.52-1.76 | 0.894   |
| NOAC                               | 0.95                     | 0.69-1.30 | 0.730   | 1.04              | 0.75-1.44 | 0.806   | 0.70               | 0.46-1.06 | 0.093   |

1  
2  
3  
4  
5 †Adjusted for age, sex, educational level, marital status and region of birth.

6 ‡Adjusted for age, sex, educational level, marital status and region of birth and all diagnoses  
7 in table 2a  
8

9 Abbreviations: ACE-inhibitors, angiotensin converting enzyme-inhibitors; ARBs, angiotensin  
10 receptor blockers; CCBs, calcium-channel blockers; DPP-4 inhibitors, dipeptidyl peptidase-4  
11 inhibitors; GLP-1 RA, glucagon-like peptide-1 receptor agonists; SGLT2 inhibitors, sodium-  
12 glucose cotransporter-2 inhibitors; NOAC, new oral anticoagulants  
13  
14  
15  
16  
17  
18  
19  
20  
21  
22  
23  
24  
25  
26  
27  
28  
29  
30  
31  
32  
33  
34  
35  
36  
37  
38  
39  
40  
41  
42  
43  
44  
45  
46  
47  
48  
49  
50  
51  
52  
53  
54  
55  
56  
57  
58  
59  
60

For peer review only

**Table 3. Covid-19 risk factors by subgroups of age, sex and region of birth.** Odds ratios for Covid-19 receiving mechanical ventilation compared to matched control subjects by tertiles of age, sex and region of birth (EU15).

|                        | Type 2 diabetes | Obesity        | Hypertension   | CKD            | CVD           | VTE            | Asthma         | SID            | Heart Failure  |
|------------------------|-----------------|----------------|----------------|----------------|---------------|----------------|----------------|----------------|----------------|
| <b>Age</b>             |                 |                |                |                |               |                |                |                |                |
| <i>21-56 years</i>     | 4.5 (3.3-6.2)   | 7.6 (5.3-11.0) | 2.6 (2.0-3.3)  | 7.7 (3.4-17.5) | 1.6 (0.8-3.3) | 3.9 (2.0-7.6)  | 4.9 (3.3-7.3)  | 6.7 (3.0-14.9) | 5.4 (2.4-12.2) |
| <i>57-67 years</i>     | 2.6 (2.0-3.4)*  | 3.7 (2.5-5.4)* | 1.7 (1.3-2.1)* | 3.2 (1.6-6.4)  | 1.4 (1.0-2.0) | 1.9 (1.1-3.2)  | 3.7 (2.7-5.1)  | 2.5 (1.1-5.5)  | 1.5 (0.8-2.6)* |
| <i>68-87 years</i>     | 1.4 (1.1-1.9)*  | 2.2 (1.3-3.7)* | 1.3 (1.0-1.7)* | 1.5 (0.8-2.7)* | 0.9 (0.7-1.2) | 1.4 (0.8-2.3)* | 2.3 (1.5-3.5)* | 2.0 (1.2-3.7)* | 0.8 (0.5-1.4)* |
| <b>Sex</b>             |                 |                |                |                |               |                |                |                |                |
| <i>Male</i>            | 2.0 (1.7-2.4)   | 3.1 (2.3-4.3)  | 1.7 (1.4-2.0)  | 2.2 (1.4-3.4)  | 1.0 (0.8-1.3) | 1.8 (1.3-2.6)  | 2.3 (1.7-3.1)  | 2.1 (1.1-3.9)  | 1.0 (0.7-1.5)  |
| <i>female</i>          | 3.5 (2.5-5.0)   | 3.2 (2.0-5.0)  | 1.8 (1.3-2.5)  | 4.2 (1.9-9.3)  | 1.2 (0.7-2.2) | 2.2 (1.1-4.2)  | 3.9 (2.6-5.8)  | 3.1 (1.8-5.3)  | 2.0 (0.9-4.4)  |
| <i>p-value</i>         | 0.001           | 0.922          | 0.327          | 0.113          | 0.416         | 0.558          | 0.030          | 0.019          | 0.103          |
| <b>Region of birth</b> |                 |                |                |                |               |                |                |                |                |
| <i>Outside EU15</i>    | 3.3 (2.6-4.2)   | 2.3 (1.6-3.4)  | 1.8 (1.5-2.3)  | 2.5 (1.4-4.6)  | 1.4 (1.0-1.9) | 1.4 (0.8-2.4)  | 3.2 (2.2-4.5)  | 2.1 (1.1-4.0)  | 1.3 (0.8-2.31) |
| <i>EU 15/Nordic</i>    | 2.0 (1.6-2.6)   | 3.7 (2.7-5.1)  | 1.6 (1.3-1.9)  | 2.6 (1.6-4.2)  | 0.9 (0.7-1.2) | 2.0 (1.4-3.0)  | 2.7 (1.9-3.7)  | 2.8 (1.7-4.6)  | 1.1 (0.7-1.7)  |
| <i>p-value</i>         | 0.004           | 0.066          | 0.476          | 0.872          | 0.072         | 0.248          | 0.584          | 0.584          | 0.651          |

P-values denote likelihood-ratio tests between a model with and one without an interaction term between the indicator variable for the subgroup and the risk factor added to model 2. Age subgroups were compared to 21-56 years, p-values for interaction are presented as \* p-value<0.05. **Abbreviations:** CKD, chronic kidney disease, CVD, cardiovascular disease (history of myocardial infarction, ischemic stroke or peripheral arterial disease); VTE, venous thromboembolic disease. SID, Systemic inflammatory disease.

1  
2  
3  
4  
5  
6  
7  
8  
9  
10  
11  
12  
13  
14  
15  
16  
17  
18  
19  
20  
21  
22  
23  
24  
25  
26  
27  
28  
29  
30  
31  
32  
33  
34  
35  
36  
37  
38  
39  
40  
41  
42  
43  
44  
45  
46  
47  
48  
49  
50  
51  
52  
53  
54  
55  
56  
57  
58  
59  
60



Associations of cardiometabolic risk factors with severe Covid-19 (adjusted odds ratios with 95% CIs).

364x265mm (72 x 72 DPI)

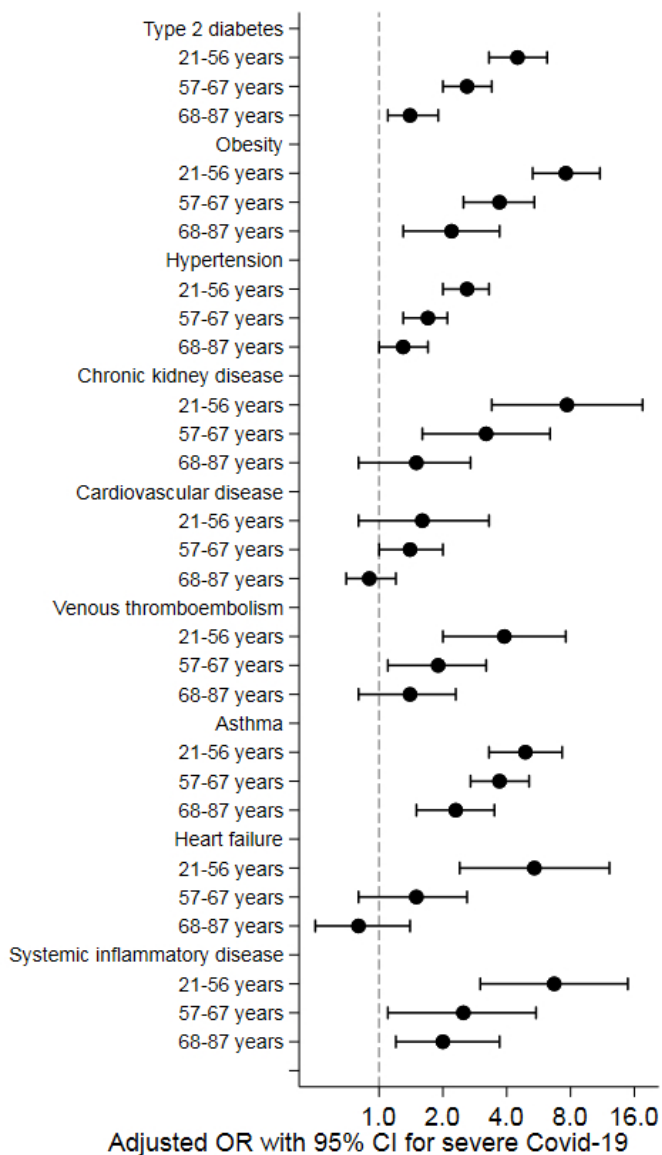

Figure 2. Associations of cardiometabolic risk factors with severe Covid-19 by age tertiles (adjusted odds ratios with 95% CIs).

181x297mm (72 x 72 DPI)

1  
2  
3  
4  
5  
6  
7  
8  
9  
10  
11  
12  
13  
14  
15  
16  
17  
18  
19  
20  
21  
22  
23  
24  
25  
26  
27  
28  
29  
30  
31  
32  
33  
34  
35  
36  
37  
38  
39  
40  
41  
42  
43  
44  
45  
46  
47  
48  
49  
50  
51  
52  
53  
54  
55  
56  
57  
58  
59  
60



Associations of cardiometabolic risk factors with severe Covid-19 by sex (adjusted odds ratios with 95% CIs).

358x260mm (72 x 72 DPI)



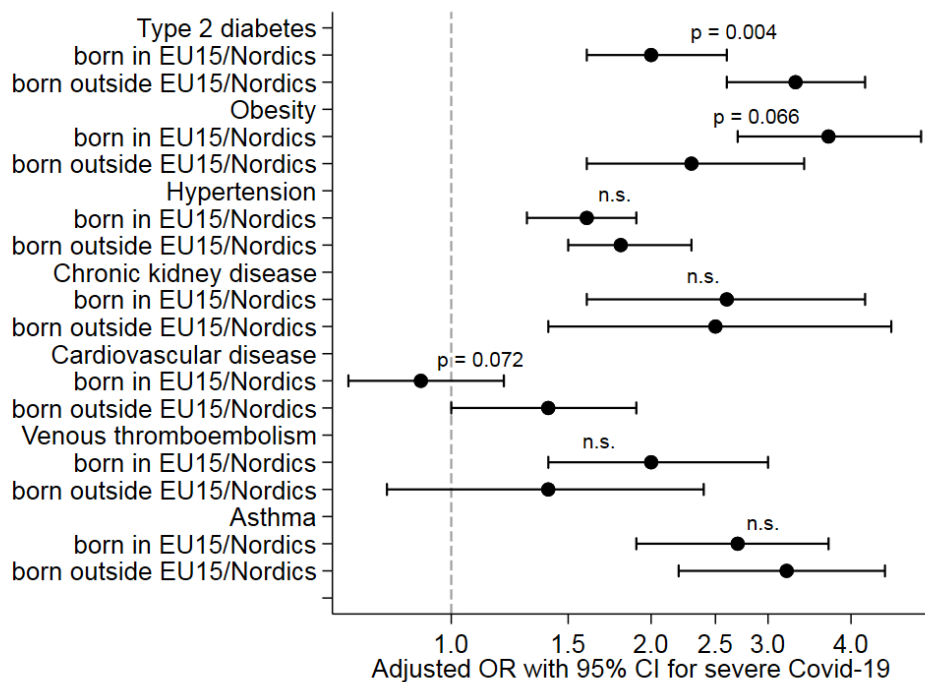

Associations of cardiometabolic risk factors with severe Covid-19 by region of birth \* (adjusted odds ratios with 95% CIs).

358x260mm (72 x 72 DPI)

1  
2  
3  
4  
5  
6  
7  
8  
9  
10  
11  
12  
13  
14  
15  
16  
17  
18  
19  
20  
21  
22

## Online Supplementary data

### Cardiometabolic factors and risk for severe COVID-19 requiring invasive mechanical ventilation during the Swedish epidemic

Svensson P, Hofmann R, Habel H, Jernberg T, Nordberg P

#### Table of contents

23  
24  
25  
26  
27  
28  
29  
30  
31  
32  
33  
34  
35  
36  
37  
38  
39  
40  
41  
42  
43  
44  
45  
46  
47  
48  
49  
50  
51  
52  
53  
54  
55  
56  
57  
58  
59  
60

|                                                                                                                                                                   |     |
|-------------------------------------------------------------------------------------------------------------------------------------------------------------------|-----|
| Supplemental methods – register information .....                                                                                                                 | 1   |
| eTable 1 – Hypertension definitions .....                                                                                                                         | 2   |
| eTable 2 - Missing Data in the Study Population.....                                                                                                              | 3   |
| eTable 3a-c - Baseline characteristics of the study population by age-group.....                                                                                  | 4-6 |
| eTable 4 - Baseline characteristics of the study population by sex .....                                                                                          | 7   |
| eTable 5 - Baseline characteristics of the study population by region of birth.....                                                                               | 8   |
| eTable 6 - Odds ratios for Covid-19 requiring ICU-admission by cardiometabolic factors and other comorbidities (n=1,417 cases and n=14,170 control subjects)..... | 9   |
| Supplemental figure S1 - Directed Acyclic Graph.....                                                                                                              | 10  |
| Supplemental figure S2 - Exclusion flowchart .....                                                                                                                | 11  |
| References.....                                                                                                                                                   | 12  |

## Supplemental methods – register information

### *The Population Register*

The Population Register is managed by Statistics Sweden and includes information on deaths, emigration and immigration for the entire Swedish population. All residents are assigned a unique personal identity number that can be used for linkage of different data resources including several national health registers of high quality.

### *The longitudinal integrated database for health insurance and labor market studies (LISA)*

LISA is managed by Statistics Sweden and includes annual measurements on several socioeconomic and sociodemographic variables, including income, education and country of birth.

### *The Swedish Patient Register*

Swedish Patient Register is managed by the National Board of Health and Welfare and covers inpatient care since 1964- (nationwide since 1987) and non-primary outpatient care since 2001. The register is nationwide with a near complete coverage during the study period.

The register is regulated by the Health Care Data Register Act (1998:543; Lag om hälsodataregister) and the Patient Register ordinance (2001:707; Förordning om patientregister hos Socialstyrelsen). It is mandatory for all physicians, private and publicly funded, to deliver data to the Patient Register. Data from the Patient Register are subjugated to the Health and Medical Services Act (1982:763; Hälso och sjukvårdslag) and the Patient Data Act (2008:355; Patientdatalag).<sup>1</sup>

### *The Swedish Prescribed Drug Register*

The Swedish Prescribed Drug Register is managed by the National Board of Health and Welfare and started on July 1, 2005. The register covers all drugs except over-the-counter medication (which is not covered at all) and medications administered at hospitals (which is only covered to some extent in the Prescribed Drug Register and completely covered through the National Patient Register in some counties).

National Board of Health and Welfare register data is protected by strict confidentiality but can be made available for research after a special review after which data can be provided to Swedish researchers according to standard legal provisions and procedures. Of special importance to the regulation of Swedish medical research and health care is also the Public Access to Information and Secrecy Act (2009:400, Offentlighets- och sekretesslagen).<sup>1</sup>

**eTable 1 – Hypertension definition.**

| Anti-hypertensive drugs             | ATC-codes          | Exclusion diagnosis (ICD-10)                                                                      |
|-------------------------------------|--------------------|---------------------------------------------------------------------------------------------------|
| Diuretics                           | C03A, C03D, C03E   |                                                                                                   |
| Beta-blockers *                     | C07A, C07F         | Angina pectoris (I208, I209)<br>Atrial fibrillation (I48)<br>MI (I21, I22)<br>Heart failure (I50) |
| Calcium channel blockers            | C08C, C08D         |                                                                                                   |
| ACE-inhibitors †                    | C09A, C09B         | Heart failure (I50)                                                                               |
| Angiotensin receptor blockers ‡     | C09C, C09DA, C09DB | Heart failure (I50)                                                                               |
| Other drugs targeting blood vessels | C02C, C02D         |                                                                                                   |

Patients with a pick-up of a prescription of the anti-hypertensive drugs within the preceding 12 months of the index date were considered as having hypertension. Beta-blockers, ACE-inhibitors, and Angiotensin receptor blockers may be prescribed for other diagnoses than hypertension. Patients were not classified as having hypertension if these drugs were found in combinations with any such diagnosis. An existing record of hypertension (I109) was superior to the pick-ups of prescribed drugs.

\* Patients with a diagnosis of angina pectoris (I208, I209), atrial fibrillation (I48), MI (I21, I22) or heart failure (I50) and simultaneously prescribed with beta-blockers were not classified as having hypertension.

† ‡ Patients with a diagnosis of heart failure (I50) with concurrently prescription of ACE inhibitors or angiotensin receptor blockers were not classified as having hypertension.

**eTable 2 - Missing Data\* in the Study Cohort**

| <b>Characteristic</b>  | <b>Missing data, No. (%)</b> |
|------------------------|------------------------------|
| Age                    | 0 (0.0)                      |
| Sex                    | 0 (0.0)                      |
| Level of education     | 239 (2.0)                    |
| Region of birth        | 5 (0.1)                      |
| Fills of prescriptions | 0 (0)                        |
| Medical history        | 0 (0)                        |

For peer review only

**eTable 3a. Baseline characteristics of the study population in the youngest tertile.** Characteristics of patients with Covid-19 requiring mechanical ventilation and control subjects

| Youngest tertile (age 21-56 years)    |                       |                                 |
|---------------------------------------|-----------------------|---------------------------------|
|                                       | Covid-19<br>(n = 367) | Control subjects<br>(n = 3,670) |
| Age, median (IQR), y                  | 49 (42-53)            | 49 (42-53)                      |
| <b>Sex:</b>                           |                       |                                 |
| Male, No. (%)                         | 261 (71.1)            | 2,610 (71.1)                    |
| <b>Sociodemographics No. (%)</b>      |                       |                                 |
| Education (years)                     |                       |                                 |
| ≤9                                    | 78 (22.5)             | 529 (14.8)                      |
| 10-12                                 | 175 (50.4)            | 1,633 (45.7)                    |
| ≥12                                   | 94 (27.1)             | 1,409 (39.5)                    |
| Marital status                        |                       |                                 |
| Unmarried                             | 169 (46.0)            | 1,911 (52.1)                    |
| Married                               | 198 (54.0)            | 1,759 (47.9)                    |
| Region of birth                       |                       |                                 |
| EU 15* and/or Nordics                 | 173 (47.3)            | 2,498 (68.1)                    |
| <b>Medical history No. (%)</b>        |                       |                                 |
| Type 1 diabetes                       | 3 (0.8)               | 22 (0.6)                        |
| Type 2 diabetes                       | 78 (21.3)             | 161 (4.4)                       |
| Obesity                               | 64 (17.4)             | 105 (2.9)                       |
| Hypertension                          | 102 (27.8)            | 473 (12.9)                      |
| Hyperlipidaemia                       | 53 (14.4)             | 230 (6.3)                       |
| Chronic kidney disease                | 13 (3.5)              | 14 (0.4)                        |
| Cardiovascular disease                | 9 (2.5)               | 53 (1.4)                        |
| Myocardial infarction                 | 7 (1.9)               | 35 (1.0)                        |
| Ischemic stroke                       | 2 (0.5)               | 15 (0.4)                        |
| Peripheral artery disease             | 1 (0.3)               | 13 (0.4)                        |
| Heart failure                         | 9 (2.5)               | 17 (0.5)                        |
| Atrial fibrillation                   | 8 (2.2)               | 34 (0.9)                        |
| Deep vein thrombosis                  | 12 (3.3)              | 31 (0.8)                        |
| Pulmonary embolism                    | 2 (0.5)               | 9 (0.2)                         |
| Chronic obstructive pulmonary disease | 2 (0.5)               | 14 (0.4)                        |
| Asthma                                | 41 (11.2)             | 100 (2.7)                       |
| Malignancy                            | 21 (5.7)              | 240 (6.5)                       |
| Rheumatoid arthritis                  | 4 (1.1)               | 22 (0.6)                        |
| Systemic inflammatory disease         | 8 (2.2)               | 14 (0.4)                        |
| Inflammatory bowel disease            | 3 (0.8)               | 55 (1.5)                        |

\* EU 15 comprises of Austria, Belgium, Denmark, Finland, France, Germany, Greece, Ireland, Italy, Luxembourg, Netherlands, Portugal, Spain, Sweden, United Kingdom. The Nordic countries include Denmark, Finland, Iceland, Norway, and Sweden.

**eTable 3b. Baseline characteristics of the study population in the mid age-group tertile.** Characteristics of patients with Covid-19 requiring mechanical ventilation and control subjects

|                                       | <b>Mid tertile (age 57-67 years)</b> |                                         |
|---------------------------------------|--------------------------------------|-----------------------------------------|
|                                       | <b>Covid-19<br/>(n = 379)</b>        | <b>Control subjects<br/>(n = 3,790)</b> |
| Age, median (IQR), y                  | 62 (59-65)                           | 62 (59-65)                              |
| <b>Sex:</b>                           |                                      |                                         |
| Male, No. (%)                         | 282 (74.4)                           | 2,820 (74.4)                            |
| <b>Sociodemographics</b> No. (%)      |                                      |                                         |
| Education (years)                     |                                      |                                         |
| ≤9                                    | 94 (25.1)                            | 697 (18.6)                              |
| 10-12                                 | 163 (43.5)                           | 1,745 (46.5)                            |
| ≥12                                   | 118 (31.5)                           | 1,310 (34.9)                            |
| Marital status                        |                                      |                                         |
| Unmarried                             | 151 (39.8)                           | 1,856 (49.0)                            |
| Married                               | 228 (60.2)                           | 1,934 (51.0)                            |
| Region of birth                       |                                      |                                         |
| EU 15* and/or Nordics                 | 195 (51.6)                           | 2,914 (76.9)                            |
| <b>Medical history</b> No. (%)        |                                      |                                         |
| Type 1 diabetes                       | 5 (1.3)                              | 10 (0.3)                                |
| Type 2 diabetes                       | 113 (29.8)                           | 463 (12.2)                              |
| Obesity                               | 12 (3.2)                             | 75 (2.0)                                |
| Hypertension                          | 207 (54.6)                           | 1,578 (41.6)                            |
| Hyperlipidaemia                       | 114 (30.1)                           | 770 (20.3)                              |
| Chronic kidney disease                | 14 (3.7)                             | 46 (1.2)                                |
| Cardiovascular disease                | 44 (11.6)                            | 311 (8.2)                               |
| Myocardial infarction                 | 26 (6.9)                             | 185 (4.9)                               |
| Ischemic stroke                       | 11 (2.9)                             | 81 (2.1)                                |
| Peripheral artery disease             | 8 (2.1)                              | 78 (2.1)                                |
| Heart failure                         | 15 (4.0)                             | 96 (2.5)                                |
| Atrial fibrillation                   | 19 (5.0)                             | 140 (3.7)                               |
| Deep vein thrombosis                  | 13 (3.4)                             | 83 (2.2)                                |
| Pulmonary embolism                    | 5 (1.3)                              | 40 (1.1)                                |
| Chronic obstructive pulmonary disease | 12 (3.2)                             | 75 (2.0)                                |
| Asthma                                | 42 (11.1)                            | 138 (3.6)                               |
| Malignancy                            | 53 (14.0)                            | 538 (14.2)                              |
| Rheumatoid arthritis                  | 9 (2.4)                              | 30 (0.8)                                |
| Systemic inflammatory disease         | 11 (2.9)                             | 39 (1.0)                                |
| Inflammatory bowel disease            | 5 (1.3)                              | 52 (1.4)                                |

\* EU 15 comprises of Austria, Belgium, Denmark, Finland, France, Germany, Greece, Ireland, Italy, Luxembourg, Netherlands, Portugal, Spain, Sweden, United Kingdom. The Nordic countries include Denmark, Finland, Iceland, Norway, and Sweden.

**eTable 3c. Baseline characteristics of the study population in the oldest tertile.** Characteristics of patients with Covid-19 requiring mechanical ventilation and control subjects

| Oldest tertile (age 68-87 years)      |                       |                                 |
|---------------------------------------|-----------------------|---------------------------------|
|                                       | Covid-19<br>(n = 340) | Control subjects<br>(n = 3,400) |
| Age, median (IQR), y                  | 73 (70-76)            | 73 (70-76)                      |
| <b>Sex:</b>                           |                       |                                 |
| Male, No. (%)                         | 270 (79.4)            | 2,700 (79.4)                    |
| <b>Sociodemographics</b> No. (%)      |                       |                                 |
| Education (years)                     |                       |                                 |
| ≤9                                    | 108 (33.3)            | 918 (27.5)                      |
| 10-12                                 | 128 (39.5)            | 1,427 (42.8)                    |
| ≥12                                   | 88 (27.2)             | 993 (29.7)                      |
| Marital status                        |                       |                                 |
| Unmarried                             | 134 (39.4)            | 1,452 (42.7)                    |
| Married                               | 206 (60.6)            | 1,948 (57.3)                    |
| Region of birth                       |                       |                                 |
| EU 15* and/or Nordics                 | 228 (67.5)            | 2,999 (88.2)                    |
| <b>Medical history</b> No. (%)        |                       |                                 |
| Type 1 diabetes                       | 1 (0.3)               | 7 (0.2)                         |
| Type 2 diabetes                       | 96 (28.2)             | 631 (18.6)                      |
| Obesity                               | 20 (5.9)              | 97 (2.9)                        |
| Hypertension                          | 243 (71.5)            | 2,207 (64.9)                    |
| Hyperlipidaemia                       | 124 (36.5)            | 1,101 (32.4)                    |
| Chronic kidney disease                | 14 (4.1)              | 86 (2.5)                        |
| Cardiovascular disease                | 60 (17.6)             | 630 (18.5)                      |
| Myocardial infarction                 | 22 (6.5)              | 341 (10.0)                      |
| Ischemic stroke                       | 20 (5.9)              | 179 (5.3)                       |
| Peripheral artery disease             | 16 (4.7)              | 159 (4.7)                       |
| Heart failure                         | 20 (5.9)              | 216 (6.4)                       |
| Atrial fibrillation                   | 57 (16.8)             | 415 (12.2)                      |
| Deep vein thrombosis                  | 15 (4.4)              | 94 (2.8)                        |
| Pulmonary embolism                    | 6 (1.8)               | 54 (1.6)                        |
| Chronic obstructive pulmonary disease | 22 (6.5)              | 149 (4.4)                       |
| Asthma                                | 33 (9.7)              | 139 (4.1)                       |
| Malignancy                            | 15 (4.4)              | 94 (2.8)                        |
| Rheumatoid arthritis                  | 4 (1.2)               | 44 (1.3)                        |
| Systemic inflammatory disease         | 15 (4.4)              | 76 (2.2)                        |
| Inflammatory bowel disease            | 10 (2.9)              | 52 (1.5)                        |

\* EU 15 comprises of Austria, Belgium, Denmark, Finland, France, Germany, Greece, Ireland, Italy, Luxembourg, Netherlands, Portugal, Spain, Sweden, United Kingdom. The Nordic countries include Denmark, Finland, Iceland, Norway, and Sweden.



**eTable 4. Baseline characteristics of the study population by sex.** Characteristics of patients with Covid-19 requiring mechanical ventilation and control subjects

|                                          | Males                 |                                    | Females               |                                    |
|------------------------------------------|-----------------------|------------------------------------|-----------------------|------------------------------------|
|                                          | Covid-19<br>(n = 813) | Control<br>subjects<br>(n = 8,130) | Covid-19<br>(n = 273) | Control<br>subjects<br>(n = 2,730) |
| Age, median (IQR), y                     | 62 (54-70)            | 62 (54-70)                         | 60 (50-68)            | 60 (50-68)                         |
| <b>Sociodemographics</b> No. (%)         |                       |                                    |                       |                                    |
| Education (years)                        |                       |                                    |                       |                                    |
| ≤9                                       | 204 (25.9)            | 1,678 (21.0)                       | 76 (29.5)             | 466 (17.3)                         |
| 10-12                                    | 351 (44.5)            | 3,606 (45.2)                       | 115 (44.6)            | 1,199 (44.6)                       |
| ≥12                                      | 233 (29.6)            | 2,691 (33.7)                       | 67 (26.0)             | 1,021 (38.0)                       |
| Marital status                           |                       |                                    |                       |                                    |
| Unmarried                                | 314 (38.6)            | 3,760 (46.2)                       | 140 (51.3)            | 1,459 (53.4)                       |
| Married                                  | 499 (61.4)            | 4,370 (53.8)                       | 133 (48.7)            | 1,271 (46.6)                       |
| Region of birth                          |                       |                                    |                       |                                    |
| EU 15* and/or Nordics                    | 439 (54.3)            | 6,250 (76.9)                       | 157 (57.5)            | 2,161 (79.2)                       |
| <b>Medical history</b> No. (%)           |                       |                                    |                       |                                    |
| Diabetes mellitus                        | 216 (26.6)            | 1,099 (13.5)                       | 69 (25.3)             | 195 (7.1)                          |
| Obesity                                  | 63 (7.7)              | 218 (2.7)                          | 36 (13.2)             | 110 (4.0)                          |
| Hypertension                             | 419 (51.5)            | 3,332 (41.0)                       | 128 (46.9)            | 926 (33.9)                         |
| Hyperlipidaemia                          | 103 (12.7)            | 667 (8.2)                          | 26 (9.5)              | 131 (4.8)                          |
| Chronic kidney disease                   | 26 (3.2)              | 121 (1.5)                          | 14 (5.1)              | 25 (0.9)                           |
| Cardiovascular disease                   | 91 (11.2)             | 877 (10.8)                         | 14 (5.1)              | 115 (4.2)                          |
| Myocardial infarction                    | 51 (6.3)              | 521 (6.4)                          | 4 (1.5)               | 38 (1.4)                           |
| Ischemic stroke                          | 22 (2.7)              | 225 (2.8)                          | 7 (2.6)               | 49 (1.8)                           |
| Peripheral artery disease                | 19 (2.3)              | 216 (2.7)                          | 5 (1.8)               | 33 (1.2)                           |
| Heart failure                            | 30 (3.7)              | 286 (3.5)                          | 10 (3.7)              | 43 (1.6)                           |
| Atrial fibrillation                      | 53 (6.5)              | 510 (6.3)                          | 12 (4.4)              | 79 (2.9)                           |
| Deep vein thrombosis                     | 31 (3.8)              | 163 (2.0)                          | 9 (3.3)               | 45 (1.6)                           |
| Pulmonary embolism                       | 9 (1.1)               | 81 (1.0)                           | 4 (1.5)               | 22 (0.8)                           |
| Chronic obstructive<br>pulmonary disease | 24 (3.0)              | 184 (2.3)                          | 8 (2.9)               | 53 (1.9)                           |
| Asthma                                   | 58 (7.1)              | 256 (3.1)                          | 42 (15.4)             | 120 (4.4)                          |
| Malignancy                               | 122 (15.0)            | 1,287 (15.8)                       | 36 (13.2)             | 453 (16.6)                         |
| Rheumatoid arthritis                     | 9 (1.1)               | 54 (0.7)                           | 8 (2.9)               | 42 (1.5)                           |
| Systemic inflammatory<br>disease         | 13 (1.6)              | 64 (0.8)                           | 20 (7.3)              | 65 (2.4)                           |
| Inflammatory bowel<br>disease            | 12 (1.5)              | 109 (1.3)                          | 5 (1.8)               | 50 (1.8)                           |

\* EU 15 comprises of Austria, Belgium, Denmark, Finland, France, Germany, Greece, Ireland, Italy, Luxembourg, Netherlands, Portugal, Spain, Sweden, United Kingdom. The Nordic countries include Denmark, Finland, Iceland, Norway, and Sweden.

**eTable 5. Baseline characteristics of the study population by region of birth.** Characteristics of patients with Covid-19 requiring mechanical ventilation and control subjects

|                                          | Region of birth within EU15/<br>and/or Nordic Countries |                                    | Region of birth outside EU15/<br>and/or Nordic Countries |                                    |
|------------------------------------------|---------------------------------------------------------|------------------------------------|----------------------------------------------------------|------------------------------------|
|                                          | Covid-19<br>(n = 596)                                   | Control<br>subjects<br>(n = 5,960) | Covid-19<br>(n = 490)                                    | Control<br>subjects<br>(n = 4,900) |
| Age, median (IQR), y                     | 64 (54-72)                                              | 64 (54-72)                         | 59 (51-67)                                               | 59 (51-67)                         |
| <b>Sex:</b>                              |                                                         |                                    |                                                          |                                    |
| Male, No. (%)                            | 439 (73.7)                                              | 4,390 (73.7)                       | 374 (76.3)                                               | 3,740 (76.3)                       |
| <b>Sociodemographics</b> No. (%)         |                                                         |                                    |                                                          |                                    |
| Education (years)                        |                                                         |                                    |                                                          |                                    |
| ≤9                                       | 121 (20.6)                                              | 1,161 (19.8)                       | 159 (34.6)                                               | 983 (20.5)                         |
| 10-12                                    | 295 (50.3)                                              | 2,636 (44.9)                       | 171 (37.3)                                               | 2,169 (45.2)                       |
| ≥12                                      | 171 (29.1)                                              | 2,069 (35.3)                       | 129 (28.1)                                               | 1,643 (34.3)                       |
| Marital status                           |                                                         |                                    |                                                          |                                    |
| Unmarried                                | 299 (50.2)                                              | 2,859 (48.0)                       | 155 (31.6)                                               | 2,360 (48.2)                       |
| Married                                  | 297 (49.8)                                              | 3,101 (52.0)                       | 335 (68.4)                                               | 2,540 (51.8)                       |
| <b>Medical history</b> No. (%)           |                                                         |                                    |                                                          |                                    |
| Diabetes mellitus                        | 128 (21.5)                                              | 699 (11.7)                         | 157 (32.0)                                               | 595 (12.1)                         |
| Obesity                                  | 60 (10.1)                                               | 170 (2.9)                          | 39 (8.0)                                                 | 158 (3.2)                          |
| Hypertension                             | 313 (52.5)                                              | 2,547 (42.7)                       | 234 (47.8)                                               | 1,711 (34.9)                       |
| Hyperlipidaemia                          | 75 (12.6)                                               | 496 (8.3)                          | 54 (11.0)                                                | 302 (6.2)                          |
| Chronic kidney disease                   | 21 (3.5)                                                | 83 (1.4)                           | 19 (3.9)                                                 | 63 (1.3)                           |
| Cardiovascular disease                   | 57 (9.6)                                                | 622 (10.4)                         | 48 (9.8)                                                 | 370 (7.6)                          |
| Myocardial infarction                    | 29 (4.9)                                                | 338 (5.7)                          | 26 (5.3)                                                 | 221 (4.5)                          |
| Ischemic stroke                          | 16 (2.7)                                                | 174 (2.9)                          | 13 (2.7)                                                 | 100 (2.0)                          |
| Peripheral artery disease                | 15 (2.5)                                                | 158 (2.7)                          | 9 (1.8)                                                  | 91 (1.9)                           |
| Heart failure                            | 21 (3.5)                                                | 192 (3.2)                          | 19 (3.9)                                                 | 137 (2.8)                          |
| Atrial fibrillation                      | 53 (8.9)                                                | 373 (6.3)                          | 12 (2.4)                                                 | 216 (4.4)                          |
| Deep vein thrombosis                     | 25 (4.2)                                                | 112 (1.9)                          | 15 (3.1)                                                 | 96 (2.0)                           |
| Pulmonary embolism                       | 8 (1.3)                                                 | 64 (1.1)                           | 5 (1.0)                                                  | 39 (0.8)                           |
| Chronic obstructive<br>pulmonary disease | 18 (3.0)                                                | 125 (2.1)                          | 14 (2.9)                                                 | 112 (2.3)                          |
| Asthma                                   | 53 (8.9)                                                | 212 (3.6)                          | 47 (9.6)                                                 | 164 (3.3)                          |
| Malignancy                               | 105 (17.6)                                              | 1,075 (18.0)                       | 53 (10.8)                                                | 665 (13.6)                         |
| Rheumatoid arthritis                     | 9 (1.5)                                                 | 64 (1.1)                           | 8 (1.6)                                                  | 32 (0.7)                           |
| Systemic inflammatory<br>disease         | 21 (3.5)                                                | 77 (1.3)                           | 12 (2.4)                                                 | 52 (1.1)                           |
| Inflammatory bowel<br>disease            | 14 (2.3)                                                | 89 (1.5)                           | 3 (0.6)                                                  | 70 (1.4)                           |

\* EU 15 comprises of Austria, Belgium, Denmark, Finland, France, Germany, Greece, Ireland, Italy, Luxembourg, Netherlands, Portugal, Spain, Sweden, United Kingdom. The Nordic countries include Denmark, Finland, Iceland, Norway, and Sweden.

**eTable 6.** Odds ratios for Covid-19 requiring ICU-admission by cardiometabolic factors and other comorbidities (n=1,417 cases and n=14,170 control subjects).

| Risk factors           | Adjusted for age and sex |           |         | Adjusted model 2† |           |         | Adjusted model 3‡ |           |         |
|------------------------|--------------------------|-----------|---------|-------------------|-----------|---------|-------------------|-----------|---------|
|                        | OR                       | 95% CI    | p-value | OR                | 95% CI    | p-value | OR                | 95% CI    | p-value |
| Type 1 diabetes        | 2.18                     | 1.19-3.98 | 0.011   | 2.84              | 1.55-5.21 | 0.001   | 2.83              | 1.51-5.30 | 0.001   |
| Type 2 diabetes        | 2.88                     | 2.51-3.31 | <0.001  | 2.42              | 2.09-2.79 | <0.001  | 1.94              | 1.64-2.31 | <0.001  |
| Obesity                | 4.17                     | 3.46-5.02 | <0.001  | 4.12              | 3.39-5.02 | <0.001  | 2.91              | 2.34-3.60 | <0.001  |
| Hypertension           | 1.83                     | 1.61-2.09 | <0.001  | 1.82              | 1.59-2.08 | <0.001  | 1.41              | 1.21-1.65 | <0.001  |
| Hyperlipidaemia        | 1.56                     | 1.36-1.79 | <0.001  | 1.47              | 1.28-1.70 | <0.001  | 0.87              | 0.74-1.03 | 0.104   |
| CKD                    | 3.22                     | 2.39-4.33 | <0.001  | 2.91              | 2.12-3.99 | <0.001  | 1.98              | 1.36-2.86 | <0.001  |
| CVD                    | 1.18                     | 0.98-1.42 | 0.089   | 1.12              | 0.93-1.36 | 0.240   | 0.72              | 0.58-0.90 | 0.004   |
| Heart failure          | 1.62                     | 1.24-2.12 | <0.001  | 1.53              | 1.15-2.03 | 0.003   | 0.87              | 0.62-1.24 | 0.442   |
| Atrial fibrillation    | 1.53                     | 1.24-1.90 | <0.001  | 1.69              | 1.36-2.10 | 0.001   | 1.32              | 1.02-1.71 | 0.035   |
| VTE                    | 1.49                     | 1.12-1.99 | 0.006   | 1.62              | 1.21-2.17 | <0.001  | 1.39              | 1.02-1.90 | 0.039   |
| COPD                   | 1.89                     | 1.42-2.52 | <0.001  | 1.85              | 1.37-2.49 | <0.001  | 1.07              | 0.74-1.54 | 0.720   |
| Asthma                 | 3.33                     | 2.76-4.02 | <0.001  | 3.39              | 2.79-4.13 | <0.001  | 2.91              | 2.35-3.62 | <0.001  |
| Malignancy             | 0.99                     | 0.85-1.16 | 0.938   | 1.08              | 0.92-1.26 | 0.358   | 0.98              | 0.83-1.16 | 0.837   |
| Rheumatoid arthritis   | 2.08                     | 1.35-3.18 | 0.001   | 2.22              | 1.45-3.39 | <0.001  | 1.68              | 1.03-2.74 | 0.038   |
| Systemic infl. disease | 2.60                     | 1.85-3.64 | <0.001  | 2.51              | 1.77-3.57 | <0.001  | 1.85              | 1.27-2.70 | 0.001   |
| Infl. bowel disease    | 0.98                     | 0.62-1.53 | 0.917   | 1.10              | 0.69-1.75 | 0.688   | 1.00              | 0.60-1.64 | 0.986   |

† Adjusted for age, sex, educational level, marital status and region of birth.

‡ Adjusted for age, sex, educational level, marital status and region of birth and all diagnoses in table 2a.

Supplemental Fig. S1 – Directed Acyclic Graph

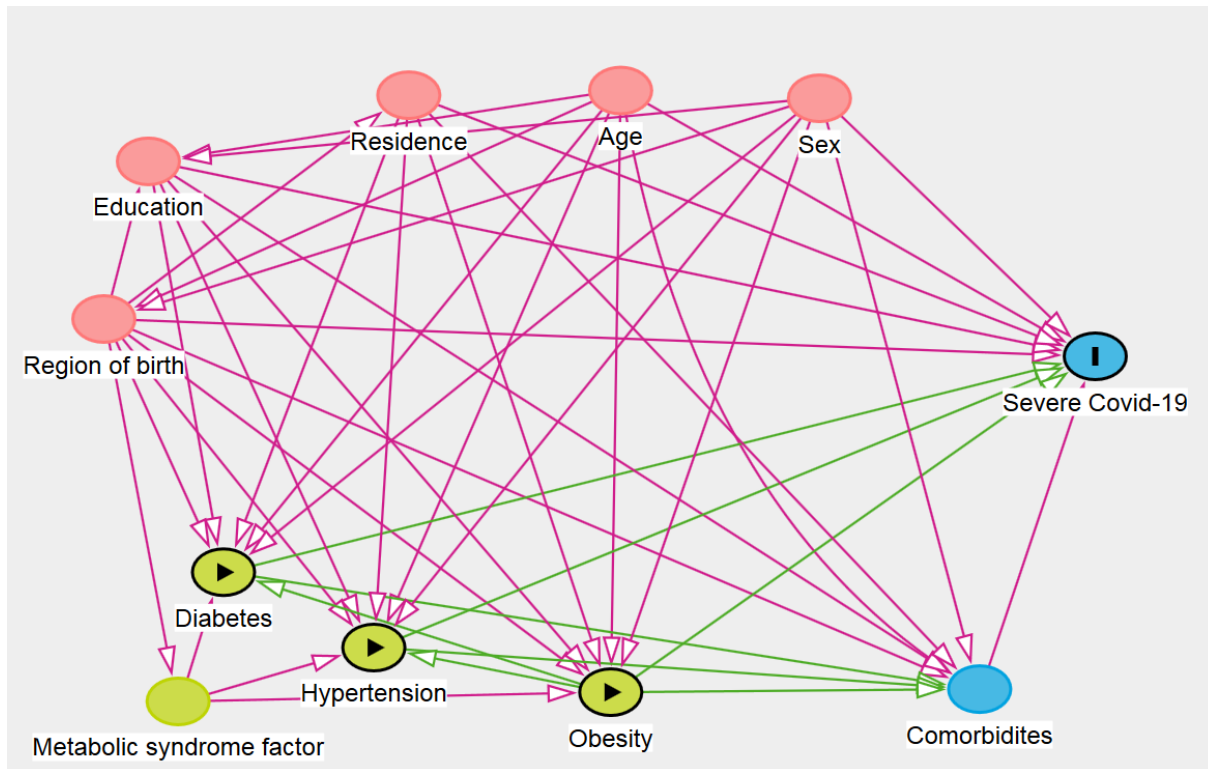

1  
2  
3  
4  
5  
6  
7  
8  
9  
10  
11  
12  
13  
14  
15  
16  
17  
18  
19  
20  
21  
22  
23  
24  
25  
26  
27  
28  
29  
30  
31  
32  
33  
34  
35  
36  
37  
38  
39  
40  
41  
42  
43  
44  
45  
46  
47  
48  
49  
50  
51  
52  
53  
54  
55  
56  
57  
58  
59  
60

## Supplemental Fig. S2 - Flow chart of exclusion criteria

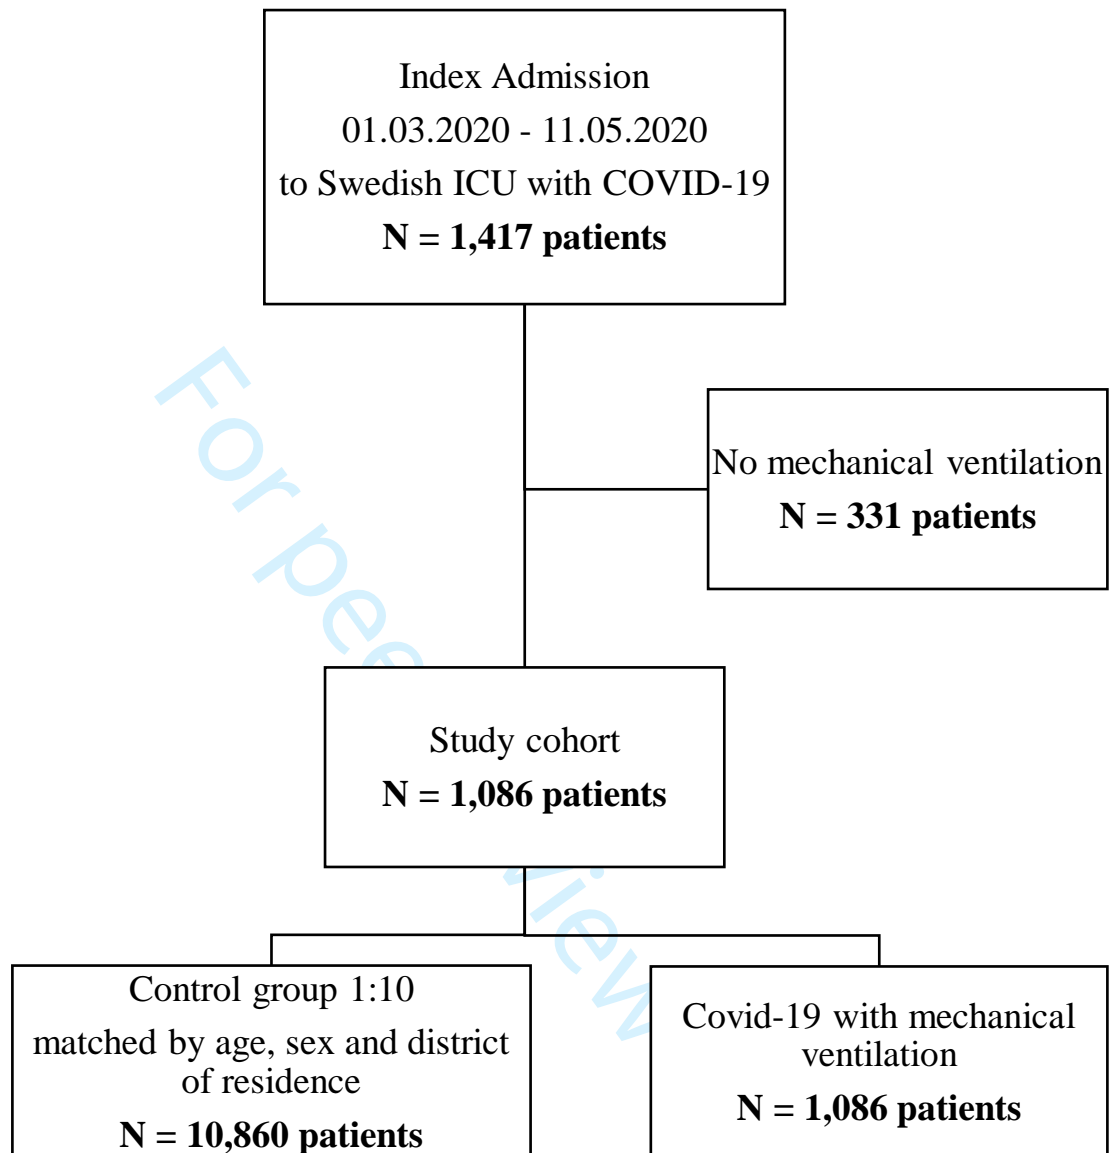

1  
2  
3  
4 1. Ludvigsson JF, Andersson E, Ekblom A, Feychting M, Kim JL, Reuterwall C,  
5 Heurgren M and Olausson PO. External review and validation of the Swedish national  
6 inpatient register. *BMC Public Health*. 2011;11:450.  
7  
8  
9  
10  
11  
12  
13  
14  
15  
16  
17  
18  
19  
20  
21  
22  
23  
24  
25  
26  
27  
28  
29  
30  
31  
32  
33  
34  
35  
36  
37  
38  
39  
40  
41  
42  
43  
44  
45  
46  
47  
48  
49  
50  
51  
52  
53  
54  
55  
56  
57  
58  
59  
60

For peer review only

STROBE Statement—Checklist of items that should be included in reports of *case-control studies*

|                              | Item No | Recommendation                                                                                                                                                                                    | Page No         |
|------------------------------|---------|---------------------------------------------------------------------------------------------------------------------------------------------------------------------------------------------------|-----------------|
| <b>Title and abstract</b>    | 1       | (a) Indicate the study's design with a commonly used term in the title or the abstract                                                                                                            | 2               |
|                              |         | (b) Provide in the abstract an informative and balanced summary of what was done and what was found                                                                                               | 2               |
| <b>Introduction</b>          |         |                                                                                                                                                                                                   |                 |
| Background/rationale         | 2       | Explain the scientific background and rationale for the investigation being reported                                                                                                              | 5               |
| Objectives                   | 3       | State specific objectives, including any prespecified hypotheses                                                                                                                                  | 6               |
| <b>Methods</b>               |         |                                                                                                                                                                                                   |                 |
| Study design                 | 4       | Present key elements of study design early in the paper                                                                                                                                           | 6               |
| Setting                      | 5       | Describe the setting, locations, and relevant dates, including periods of recruitment, exposure, follow-up, and data collection                                                                   | 6               |
| Participants                 | 6       | (a) Give the eligibility criteria, and the sources and methods of case ascertainment and control selection. Give the rationale for the choice of cases and controls                               | 6               |
|                              |         | (b) For matched studies, give matching criteria and the number of controls per case                                                                                                               | 6               |
| Variables                    | 7       | Clearly define all outcomes, exposures, predictors, potential confounders, and effect modifiers. Give diagnostic criteria, if applicable                                                          | 7,8             |
| Data sources/<br>measurement | 8*      | For each variable of interest, give sources of data and details of methods of assessment (measurement). Describe comparability of assessment methods if there is more than one group              | 7               |
| Bias                         | 9       | Describe any efforts to address potential sources of bias                                                                                                                                         | 9               |
| Study size                   | 10      | Explain how the study size was arrived at                                                                                                                                                         | 6               |
| Quantitative variables       | 11      | Explain how quantitative variables were handled in the analyses. If applicable, describe which groupings were chosen and why                                                                      | 8               |
| Statistical methods          | 12      | (a) Describe all statistical methods, including those used to control for confounding                                                                                                             | 8               |
|                              |         | (b) Describe any methods used to examine subgroups and interactions                                                                                                                               | 8               |
|                              |         | (c) Explain how missing data were addressed                                                                                                                                                       | 8               |
|                              |         | (d) If applicable, explain how matching of cases and controls was addressed                                                                                                                       | 8               |
|                              |         | (e) Describe any sensitivity analyses                                                                                                                                                             |                 |
| <b>Results</b>               |         |                                                                                                                                                                                                   |                 |
| Participants                 | 13*     | (a) Report numbers of individuals at each stage of study—eg numbers potentially eligible, examined for eligibility, confirmed eligible, included in the study, completing follow-up, and analysed | Suppl Figure S2 |
|                              |         | (b) Give reasons for non-participation at each stage                                                                                                                                              | Suppl Figure S2 |
|                              |         | (c) Consider use of a flow diagram                                                                                                                                                                | Suppl Figure S2 |
| Descriptive data             | 14*     | (a) Give characteristics of study participants (eg demographic, clinical, social) and information on exposures and potential confounders                                                          | 9               |

1  
2  
3  
4  
5  
6  
7  
8  
9  
10  
11  
12  
13  
14  
15  
16  
17  
18  
19  
20  
21  
22  
23  
24  
25  
26  
27  
28  
29  
30  
31  
32  
33  
34  
35  
36  
37  
38  
39  
40  
41  
42  
43  
44  
45  
46  
47  
48  
49  
50  
51  
52  
53  
54  
55  
56  
57  
58  
59  
60

|              |     |                                                                                     |         |
|--------------|-----|-------------------------------------------------------------------------------------|---------|
|              |     | (b) Indicate number of participants with missing data for each variable of interest | Etable2 |
| Outcome data | 15* | Report numbers in each exposure category, or summary measures of exposure           | Table 2 |

For peer review only



|    |                          |    |                                                                                                                                                                                                              |
|----|--------------------------|----|--------------------------------------------------------------------------------------------------------------------------------------------------------------------------------------------------------------|
| 1  |                          |    |                                                                                                                                                                                                              |
| 2  |                          |    |                                                                                                                                                                                                              |
| 3  |                          |    |                                                                                                                                                                                                              |
| 4  | Main results             | 16 | (a) Give unadjusted estimates and, if applicable, confounder-adjusted estimates and their precision (eg, 95% confidence interval). Make clear which confounders were adjusted for and why they were included |
| 5  |                          |    |                                                                                                                                                                                                              |
| 6  |                          |    |                                                                                                                                                                                                              |
| 7  |                          |    | (b) Report category boundaries when continuous variables were categorized                                                                                                                                    |
| 8  |                          |    |                                                                                                                                                                                                              |
| 9  |                          |    | (c) If relevant, consider translating estimates of relative risk into absolute risk for a meaningful time period                                                                                             |
| 10 |                          |    |                                                                                                                                                                                                              |
| 11 | Other analyses           | 17 | Report other analyses done—eg analyses of subgroups and interactions, and sensitivity analyses                                                                                                               |
| 12 |                          |    |                                                                                                                                                                                                              |
| 13 |                          |    |                                                                                                                                                                                                              |
| 14 |                          |    |                                                                                                                                                                                                              |
| 15 | <b>Discussion</b>        |    |                                                                                                                                                                                                              |
| 16 | Key results              | 18 | Summarise key results with reference to study objectives                                                                                                                                                     |
| 17 |                          |    |                                                                                                                                                                                                              |
| 18 | Limitations              | 19 | Discuss limitations of the study, taking into account sources of potential bias or imprecision. Discuss both direction and magnitude of any potential bias                                                   |
| 19 |                          |    |                                                                                                                                                                                                              |
| 20 | Interpretation           | 20 | Give a cautious overall interpretation of results considering objectives, limitations, multiplicity of analyses, results from similar studies, and other relevant evidence                                   |
| 21 |                          |    |                                                                                                                                                                                                              |
| 22 |                          |    |                                                                                                                                                                                                              |
| 23 | Generalisability         | 21 | Discuss the generalisability (external validity) of the study results                                                                                                                                        |
| 24 |                          |    |                                                                                                                                                                                                              |
| 25 | <b>Other information</b> |    |                                                                                                                                                                                                              |
| 26 | Funding                  | 22 | Give the source of funding and the role of the funders for the present study and, if applicable, for the original study on which the present article is based                                                |
| 27 |                          |    |                                                                                                                                                                                                              |
| 28 |                          |    |                                                                                                                                                                                                              |
| 29 |                          |    |                                                                                                                                                                                                              |
| 30 |                          |    |                                                                                                                                                                                                              |
| 31 |                          |    |                                                                                                                                                                                                              |
| 32 |                          |    |                                                                                                                                                                                                              |
| 33 |                          |    |                                                                                                                                                                                                              |
| 34 |                          |    |                                                                                                                                                                                                              |
| 35 |                          |    |                                                                                                                                                                                                              |
| 36 |                          |    |                                                                                                                                                                                                              |
| 37 |                          |    |                                                                                                                                                                                                              |
| 38 |                          |    |                                                                                                                                                                                                              |
| 39 |                          |    |                                                                                                                                                                                                              |
| 40 |                          |    |                                                                                                                                                                                                              |
| 41 |                          |    |                                                                                                                                                                                                              |
| 42 |                          |    |                                                                                                                                                                                                              |
| 43 |                          |    |                                                                                                                                                                                                              |
| 44 |                          |    |                                                                                                                                                                                                              |
| 45 |                          |    |                                                                                                                                                                                                              |
| 46 |                          |    |                                                                                                                                                                                                              |
| 47 |                          |    |                                                                                                                                                                                                              |
| 48 |                          |    |                                                                                                                                                                                                              |
| 49 |                          |    |                                                                                                                                                                                                              |
| 50 |                          |    |                                                                                                                                                                                                              |
| 51 |                          |    |                                                                                                                                                                                                              |
| 52 |                          |    |                                                                                                                                                                                                              |
| 53 |                          |    |                                                                                                                                                                                                              |
| 54 |                          |    |                                                                                                                                                                                                              |
| 55 |                          |    |                                                                                                                                                                                                              |
| 56 |                          |    |                                                                                                                                                                                                              |
| 57 |                          |    |                                                                                                                                                                                                              |
| 58 |                          |    |                                                                                                                                                                                                              |
| 59 |                          |    |                                                                                                                                                                                                              |
| 60 |                          |    |                                                                                                                                                                                                              |

\*Give information separately for cases and controls.

**Note:** An Explanation and Elaboration article discusses each checklist item and gives methodological background and published examples of transparent reporting. The STROBE checklist is best used in conjunction with this article (freely available on the Web sites of PLoS Medicine at <http://www.plosmedicine.org/>, Annals of Internal Medicine at <http://www.annals.org/>, and Epidemiology at <http://www.epidem.com/>). Information on the STROBE Initiative is available at <http://www.strobe-statement.org>.
