# Supplementary material for: Association between cardiometabolic disease and severe COVID-19: a nationwide case–control study of patients requiring invasive mechanical ventilation
Source: PubMed Central journal article supplement (PMC7893210; doi:10.1136/bmjopen-2020-044486), 2021-02-17
Supplement: bmjopen-2020-044486supp001.pdf [file bmjopen-2020-044486supp001.pdf]

## Online Supplementary data

### **Cardiometabolic factors and risk for severe COVID-19 requiring invasive mechanical ventilation during the Swedish epidemic**

Svensson P, Hofmann R, Habel H, Jernberg T, Nordberg P

#### Table of contents

|                                                                                                                                                                   |     |
|-------------------------------------------------------------------------------------------------------------------------------------------------------------------|-----|
| Supplemental methods – register information .....                                                                                                                 | 1   |
| eTable 1 – Hypertension definitions .....                                                                                                                         | 2   |
| eTable 2 - Missing Data in the Study Population .....                                                                                                             | 3   |
| eTable 3a-c - Baseline characteristics of the study population by age-group.....                                                                                  | 4-6 |
| eTable 4 - Baseline characteristics of the study population by sex .....                                                                                          | 7   |
| eTable 5 - Baseline characteristics of the study population by region of birth.....                                                                               | 8   |
| eTable 6 - Odds ratios for Covid-19 requiring ICU-admission by cardiometabolic factors and other comorbidities (n=1,417 cases and n=14,170 control subjects)..... | 9   |
| Supplemental figure S1 - Directed Acyclic Graph.....                                                                                                              | 10  |
| Supplemental figure S2 - Exclusion flowchart .....                                                                                                                | 11  |
| References.....                                                                                                                                                   | 12  |

## Supplemental methods – register information

### *The Population Register*

The Population Register is managed by Statistics Sweden and includes information on deaths, emigration and immigration for the entire Swedish population. All residents are assigned a unique personal identity number that can be used for linkage of different data resources including several national health registers of high quality.

### *The longitudinal integrated database for health insurance and labor market studies (LISA)*

LISA is managed by Statistics Sweden and includes annual measurements on several socioeconomic and sociodemographic variables, including income, education and country of birth.

### *The Swedish Patient Register*

Swedish Patient Register is managed by the National Board of Health and Welfare and covers inpatient care since 1964- (nationwide since 1987) and non-primary outpatient care since 2001. The register is nationwide with a near complete coverage during the study period.

The register is regulated by the Health Care Data Register Act (1998:543; Lag om hälsodataregister) and the Patient Register ordinance (2001:707; Förordning om patientregister hos Socialstyrelsen). It is mandatory for all physicians, private and publicly funded, to deliver data to the Patient Register. Data from the Patient Register are subjugated to the Health and Medical Services Act (1982:763; Hälso och sjukvårdslag) and the Patient Data Act (2008:355; Patientdatalag).<sup>1</sup>

### *The Swedish Prescribed Drug Register*

The Swedish Prescribed Drug Register is managed by the National Board of Health and Welfare and started on July 1, 2005. The register covers all drugs except over-the-counter medication (which is not covered at all) and medications administered at hospitals (which is only covered to some extent in the Prescribed Drug Register and completely covered through the National Patient Register in some counties).

National Board of Health and Welfare register data is protected by strict confidentiality but can be made available for research after a special review after which data can be provided to Swedish researchers according to standard legal provisions and procedures. Of special importance to the regulation of Swedish medical research and health care is also the Public Access to Information and Secrecy Act (2009:400, Offentlighets- och sekretesslagen).<sup>1</sup>

***eTable 1 – Hypertension definition.***

| Anti-hypertensive drugs             | ATC-codes          | Exclusion diagnosis (ICD-10)                                                                      |
|-------------------------------------|--------------------|---------------------------------------------------------------------------------------------------|
| Diuretics                           | C03A, C03D, C03E   |                                                                                                   |
| Beta-blockers *                     | C07A, C07F         | Angina pectoris (I208, I209)<br>Atrial fibrillation (I48)<br>MI (I21, I22)<br>Heart failure (I50) |
| Calcium channel blockers            | C08C, C08D         |                                                                                                   |
| ACE-inhibitors †                    | C09A, C09B         | Heart failure (I50)                                                                               |
| Angiotensin receptor blockers ‡     | C09C, C09DA, C09DB | Heart failure (I50)                                                                               |
| Other drugs targeting blood vessels | C02C, C02D         |                                                                                                   |

Patients with a pick-up of a prescription of the anti-hypertensive drugs within the preceding 12 months of the index date were considered as having hypertension. Beta-blockers, ACE-inhibitors, and Angiotensin receptor blockers may be prescribed for other diagnoses than hypertension. Patients were not classified as having hypertension if these drugs were found in combinations with any such diagnosis. An existing record of hypertension (I109) was superior to the pick-ups of prescribed drugs.

\* Patients with a diagnosis of angina pectoris (I208, I209), atrial fibrillation (I48), MI (I21, I22) or heart failure (I50) and simultaneously prescribed with beta-blockers were not classified as having hypertension.

† ‡ Patients with a diagnosis of heart failure (I50) with concurrently prescription of ACE inhibitors or angiotensin receptor blockers were not classified as having hypertension.

---

**eTable 2 - Missing Data\* in the Study Cohort**

| <b>Characteristic</b>  | <b>Missing data, No. (%)</b> |
|------------------------|------------------------------|
| Age                    | 0 (0.0)                      |
| Sex                    | 0 (0.0)                      |
| Level of education     | 239 (2.0)                    |
| Region of birth        | 5 (0.1)                      |
| Fills of prescriptions | 0 (0)                        |
| Medical history        | 0 (0)                        |

**eTable 3a. Baseline characteristics of the study population in the youngest tertile.** Characteristics of patients with Covid-19 requiring mechanical ventilation and control subjects

| <b>Youngest tertile (age 21-56 years)</b> |                               |                                         |
|-------------------------------------------|-------------------------------|-----------------------------------------|
|                                           | <b>Covid-19<br/>(n = 367)</b> | <b>Control subjects<br/>(n = 3,670)</b> |
| Age, median (IQR), y                      | 49 (42-53)                    | 49 (42-53)                              |
| <b>Sex:</b>                               |                               |                                         |
| Male, No. (%)                             | 261 (71.1)                    | 2,610 (71.1)                            |
| <b>Sociodemographics No. (%)</b>          |                               |                                         |
| Education (years)                         |                               |                                         |
| ≤9                                        | 78 (22.5)                     | 529 (14.8)                              |
| 10-12                                     | 175 (50.4)                    | 1,633 (45.7)                            |
| ≥12                                       | 94 (27.1)                     | 1,409 (39.5)                            |
| Marital status                            |                               |                                         |
| Unmarried                                 | 169 (46.0)                    | 1,911 (52.1)                            |
| Married                                   | 198 (54.0)                    | 1,759 (47.9)                            |
| Region of birth                           |                               |                                         |
| EU 15* and/or Nordics                     | 173 (47.3)                    | 2,498 (68.1)                            |
| <b>Medical history No. (%)</b>            |                               |                                         |
| Type 1 diabetes                           | 3 (0.8)                       | 22 (0.6)                                |
| Type 2 diabetes                           | 78 (21.3)                     | 161 (4.4)                               |
| Obesity                                   | 64 (17.4)                     | 105 (2.9)                               |
| Hypertension                              | 102 (27.8)                    | 473 (12.9)                              |
| Hyperlipidaemia                           | 53 (14.4)                     | 230 (6.3)                               |
| Chronic kidney disease                    | 13 (3.5)                      | 14 (0.4)                                |
| Cardiovascular disease                    | 9 (2.5)                       | 53 (1.4)                                |
| Myocardial infarction                     | 7 (1.9)                       | 35 (1.0)                                |
| Ischemic stroke                           | 2 (0.5)                       | 15 (0.4)                                |
| Peripheral artery disease                 | 1 (0.3)                       | 13 (0.4)                                |
| Heart failure                             | 9 (2.5)                       | 17 (0.5)                                |
| Atrial fibrillation                       | 8 (2.2)                       | 34 (0.9)                                |
| Deep vein thrombosis                      | 12 (3.3)                      | 31 (0.8)                                |
| Pulmonary embolism                        | 2 (0.5)                       | 9 (0.2)                                 |
| Chronic obstructive pulmonary disease     | 2 (0.5)                       | 14 (0.4)                                |
| Asthma                                    | 41 (11.2)                     | 100 (2.7)                               |
| Malignancy                                | 21 (5.7)                      | 240 (6.5)                               |
| Rheumatoid arthritis                      | 4 (1.1)                       | 22 (0.6)                                |
| Systemic inflammatory disease             | 8 (2.2)                       | 14 (0.4)                                |
| Inflammatory bowel disease                | 3 (0.8)                       | 55 (1.5)                                |

\* EU 15 comprises of Austria, Belgium, Denmark, Finland, France, Germany, Greece, Ireland, Italy, Luxembourg, Netherlands, Portugal, Spain, Sweden, United Kingdom. The Nordic countries include Denmark, Finland, Iceland, Norway, and Sweden.

**eTable 3b. Baseline characteristics of the study population in the mid age-group tertile.** Characteristics of patients with Covid-19 requiring mechanical ventilation and control subjects

| <b>Mid tertile (age 57-67 years)</b>  |                               |                                         |
|---------------------------------------|-------------------------------|-----------------------------------------|
|                                       | <b>Covid-19<br/>(n = 379)</b> | <b>Control subjects<br/>(n = 3,790)</b> |
| Age, median (IQR), y                  | 62 (59-65)                    | 62 (59-65)                              |
| <b>Sex:</b>                           |                               |                                         |
| Male, No. (%)                         | 282 (74.4)                    | 2,820 (74.4)                            |
| <b>Sociodemographics No. (%)</b>      |                               |                                         |
| Education (years)                     |                               |                                         |
| ≤9                                    | 94 (25.1)                     | 697 (18.6)                              |
| 10-12                                 | 163 (43.5)                    | 1,745 (46.5)                            |
| ≥12                                   | 118 (31.5)                    | 1,310 (34.9)                            |
| Marital status                        |                               |                                         |
| Unmarried                             | 151 (39.8)                    | 1,856 (49.0)                            |
| Married                               | 228 (60.2)                    | 1,934 (51.0)                            |
| Region of birth                       |                               |                                         |
| EU 15* and/or Nordics                 | 195 (51.6)                    | 2,914 (76.9)                            |
| <b>Medical history No. (%)</b>        |                               |                                         |
| Type 1 diabetes                       | 5 (1.3)                       | 10 (0.3)                                |
| Type 2 diabetes                       | 113 (29.8)                    | 463 (12.2)                              |
| Obesity                               | 12 (3.2)                      | 75 (2.0)                                |
| Hypertension                          | 207 (54.6)                    | 1,578 (41.6)                            |
| Hyperlipidaemia                       | 114 (30.1)                    | 770 (20.3)                              |
| Chronic kidney disease                | 14 (3.7)                      | 46 (1.2)                                |
| Cardiovascular disease                | 44 (11.6)                     | 311 (8.2)                               |
| Myocardial infarction                 | 26 (6.9)                      | 185 (4.9)                               |
| Ischemic stroke                       | 11 (2.9)                      | 81 (2.1)                                |
| Peripheral artery disease             | 8 (2.1)                       | 78 (2.1)                                |
| Heart failure                         | 15 (4.0)                      | 96 (2.5)                                |
| Atrial fibrillation                   | 19 (5.0)                      | 140 (3.7)                               |
| Deep vein thrombosis                  | 13 (3.4)                      | 83 (2.2)                                |
| Pulmonary embolism                    | 5 (1.3)                       | 40 (1.1)                                |
| Chronic obstructive pulmonary disease | 12 (3.2)                      | 75 (2.0)                                |
| Asthma                                | 42 (11.1)                     | 138 (3.6)                               |
| Malignancy                            | 53 (14.0)                     | 538 (14.2)                              |
| Rheumatoid arthritis                  | 9 (2.4)                       | 30 (0.8)                                |
| Systemic inflammatory disease         | 11 (2.9)                      | 39 (1.0)                                |
| Inflammatory bowel disease            | 5 (1.3)                       | 52 (1.4)                                |

\* EU 15 comprises of Austria, Belgium, Denmark, Finland, France, Germany, Greece, Ireland, Italy, Luxembourg, Netherlands, Portugal, Spain, Sweden, United Kingdom. The Nordic countries include Denmark, Finland, Iceland, Norway, and Sweden.

**eTable 3c. Baseline characteristics of the study population in the oldest tertile.** Characteristics of patients with Covid-19 requiring mechanical ventilation and control subjects

| <b>Oldest tertile (age 68-87 years)</b> |                               |                                         |
|-----------------------------------------|-------------------------------|-----------------------------------------|
|                                         | <b>Covid-19<br/>(n = 340)</b> | <b>Control subjects<br/>(n = 3,400)</b> |
| Age, median (IQR), y                    | 73 (70-76)                    | 73 (70-76)                              |
| <b>Sex:</b>                             |                               |                                         |
| Male, No. (%)                           | 270 (79.4)                    | 2,700 (79.4)                            |
| <b>Sociodemographics No. (%)</b>        |                               |                                         |
| Education (years)                       |                               |                                         |
| ≤9                                      | 108 (33.3)                    | 918 (27.5)                              |
| 10-12                                   | 128 (39.5)                    | 1,427 (42.8)                            |
| ≥12                                     | 88 (27.2)                     | 993 (29.7)                              |
| Marital status                          |                               |                                         |
| Unmarried                               | 134 (39.4)                    | 1,452 (42.7)                            |
| Married                                 | 206 (60.6)                    | 1,948 (57.3)                            |
| Region of birth                         |                               |                                         |
| EU 15* and/or Nordics                   | 228 (67.5)                    | 2,999 (88.2)                            |
| <b>Medical history No. (%)</b>          |                               |                                         |
| Type 1 diabetes                         | 1 (0.3)                       | 7 (0.2)                                 |
| Type 2 diabetes                         | 96 (28.2)                     | 631 (18.6)                              |
| Obesity                                 | 20 (5.9)                      | 97 (2.9)                                |
| Hypertension                            | 243 (71.5)                    | 2,207 (64.9)                            |
| Hyperlipidaemia                         | 124 (36.5)                    | 1,101 (32.4)                            |
| Chronic kidney disease                  | 14 (4.1)                      | 86 (2.5)                                |
| Cardiovascular disease                  | 60 (17.6)                     | 630 (18.5)                              |
| Myocardial infarction                   | 22 (6.5)                      | 341 (10.0)                              |
| Ischemic stroke                         | 20 (5.9)                      | 179 (5.3)                               |
| Peripheral artery disease               | 16 (4.7)                      | 159 (4.7)                               |
| Heart failure                           | 20 (5.9)                      | 216 (6.4)                               |
| Atrial fibrillation                     | 57 (16.8)                     | 415 (12.2)                              |
| Deep vein thrombosis                    | 15 (4.4)                      | 94 (2.8)                                |
| Pulmonary embolism                      | 6 (1.8)                       | 54 (1.6)                                |
| Chronic obstructive pulmonary disease   | 22 (6.5)                      | 149 (4.4)                               |
| Asthma                                  | 33 (9.7)                      | 139 (4.1)                               |
| Malignancy                              | 15 (4.4)                      | 94 (2.8)                                |
| Rheumatoid arthritis                    | 4 (1.2)                       | 44 (1.3)                                |
| Systemic inflammatory disease           | 15 (4.4)                      | 76 (2.2)                                |
| Inflammatory bowel disease              | 10 (2.9)                      | 52 (1.5)                                |

\* EU 15 comprises of Austria, Belgium, Denmark, Finland, France, Germany, Greece, Ireland, Italy, Luxembourg, Netherlands, Portugal, Spain, Sweden, United Kingdom. The Nordic countries include Denmark, Finland, Iceland, Norway, and Sweden.

**eTable 4. Baseline characteristics of the study population by sex.** Characteristics of patients with Covid-19 requiring mechanical ventilation and control subjects

|                                       | Males                 |                                    | Females               |                                    |
|---------------------------------------|-----------------------|------------------------------------|-----------------------|------------------------------------|
|                                       | Covid-19<br>(n = 813) | Control<br>subjects<br>(n = 8,130) | Covid-19<br>(n = 273) | Control<br>subjects<br>(n = 2,730) |
| Age, median (IQR), y                  | 62 (54-70)            | 62 (54-70)                         | 60 (50-68)            | 60 (50-68)                         |
| <b>Sociodemographics</b> No. (%)      |                       |                                    |                       |                                    |
| Education (years)                     |                       |                                    |                       |                                    |
| ≤9                                    | 204 (25.9)            | 1,678 (21.0)                       | 76 (29.5)             | 466 (17.3)                         |
| 10-12                                 | 351 (44.5)            | 3,606 (45.2)                       | 115 (44.6)            | 1,199 (44.6)                       |
| ≥12                                   | 233 (29.6)            | 2,691 (33.7)                       | 67 (26.0)             | 1,021 (38.0)                       |
| Marital status                        |                       |                                    |                       |                                    |
| Unmarried                             | 314 (38.6)            | 3,760 (46.2)                       | 140 (51.3)            | 1,459 (53.4)                       |
| Married                               | 499 (61.4)            | 4,370 (53.8)                       | 133 (48.7)            | 1,271 (46.6)                       |
| Region of birth                       |                       |                                    |                       |                                    |
| EU 15* and/or Nordics                 | 439 (54.3)            | 6,250 (76.9)                       | 157 (57.5)            | 2,161 (79.2)                       |
| <b>Medical history</b> No. (%)        |                       |                                    |                       |                                    |
| Diabetes mellitus                     | 216 (26.6)            | 1,099 (13.5)                       | 69 (25.3)             | 195 (7.1)                          |
| Obesity                               | 63 (7.7)              | 218 (2.7)                          | 36 (13.2)             | 110 (4.0)                          |
| Hypertension                          | 419 (51.5)            | 3,332 (41.0)                       | 128 (46.9)            | 926 (33.9)                         |
| Hyperlipidaemia                       | 103 (12.7)            | 667 (8.2)                          | 26 (9.5)              | 131 (4.8)                          |
| Chronic kidney disease                | 26 (3.2)              | 121 (1.5)                          | 14 (5.1)              | 25 (0.9)                           |
| Cardiovascular disease                | 91 (11.2)             | 877 (10.8)                         | 14 (5.1)              | 115 (4.2)                          |
| Myocardial infarction                 | 51 (6.3)              | 521 (6.4)                          | 4 (1.5)               | 38 (1.4)                           |
| Ischemic stroke                       | 22 (2.7)              | 225 (2.8)                          | 7 (2.6)               | 49 (1.8)                           |
| Peripheral artery disease             | 19 (2.3)              | 216 (2.7)                          | 5 (1.8)               | 33 (1.2)                           |
| Heart failure                         | 30 (3.7)              | 286 (3.5)                          | 10 (3.7)              | 43 (1.6)                           |
| Atrial fibrillation                   | 53 (6.5)              | 510 (6.3)                          | 12 (4.4)              | 79 (2.9)                           |
| Deep vein thrombosis                  | 31 (3.8)              | 163 (2.0)                          | 9 (3.3)               | 45 (1.6)                           |
| Pulmonary embolism                    | 9 (1.1)               | 81 (1.0)                           | 4 (1.5)               | 22 (0.8)                           |
| Chronic obstructive pulmonary disease | 24 (3.0)              | 184 (2.3)                          | 8 (2.9)               | 53 (1.9)                           |
| Asthma                                | 58 (7.1)              | 256 (3.1)                          | 42 (15.4)             | 120 (4.4)                          |
| Malignancy                            | 122 (15.0)            | 1,287 (15.8)                       | 36 (13.2)             | 453 (16.6)                         |
| Rheumatoid arthritis                  | 9 (1.1)               | 54 (0.7)                           | 8 (2.9)               | 42 (1.5)                           |
| Systemic inflammatory disease         | 13 (1.6)              | 64 (0.8)                           | 20 (7.3)              | 65 (2.4)                           |
| Inflammatory bowel disease            | 12 (1.5)              | 109 (1.3)                          | 5 (1.8)               | 50 (1.8)                           |

\* EU 15 comprises of Austria, Belgium, Denmark, Finland, France, Germany, Greece, Ireland, Italy, Luxembourg, Netherlands, Portugal, Spain, Sweden, United Kingdom. The Nordic countries include Denmark, Finland, Iceland, Norway, and Sweden.



**eTable 5. Baseline characteristics of the study population by region of birth.** Characteristics of patients with Covid-19 requiring mechanical ventilation and control subjects

|                                          | Region of birth within EU15/<br>and/or Nordic Countries |                                    | Region of birth outside EU15/<br>and/or Nordic Countries |                                    |
|------------------------------------------|---------------------------------------------------------|------------------------------------|----------------------------------------------------------|------------------------------------|
|                                          | Covid-19<br>(n = 596)                                   | Control<br>subjects<br>(n = 5,960) | Covid-19<br>(n = 490)                                    | Control<br>subjects<br>(n = 4,900) |
| Age, median (IQR), y                     | 64 (54-72)                                              | 64 (54-72)                         | 59 (51-67)                                               | 59 (51-67)                         |
| <b>Sex:</b>                              |                                                         |                                    |                                                          |                                    |
| Male, No. (%)                            | 439 (73.7)                                              | 4,390 (73.7)                       | 374 (76.3)                                               | 3,740 (76.3)                       |
| <b>Sociodemographics</b> No. (%)         |                                                         |                                    |                                                          |                                    |
| Education (years)                        |                                                         |                                    |                                                          |                                    |
| ≤9                                       | 121 (20.6)                                              | 1,161 (19.8)                       | 159 (34.6)                                               | 983 (20.5)                         |
| 10-12                                    | 295 (50.3)                                              | 2,636 (44.9)                       | 171 (37.3)                                               | 2,169 (45.2)                       |
| ≥12                                      | 171 (29.1)                                              | 2,069 (35.3)                       | 129 (28.1)                                               | 1,643 (34.3)                       |
| Marital status                           |                                                         |                                    |                                                          |                                    |
| Unmarried                                | 299 (50.2)                                              | 2,859 (48.0)                       | 155 (31.6)                                               | 2,360 (48.2)                       |
| Married                                  | 297 (49.8)                                              | 3,101 (52.0)                       | 335 (68.4)                                               | 2,540 (51.8)                       |
| <b>Medical history</b> No. (%)           |                                                         |                                    |                                                          |                                    |
| Diabetes mellitus                        | 128 (21.5)                                              | 699 (11.7)                         | 157 (32.0)                                               | 595 (12.1)                         |
| Obesity                                  | 60 (10.1)                                               | 170 (2.9)                          | 39 (8.0)                                                 | 158 (3.2)                          |
| Hypertension                             | 313 (52.5)                                              | 2,547 (42.7)                       | 234 (47.8)                                               | 1,711 (34.9)                       |
| Hyperlipidaemia                          | 75 (12.6)                                               | 496 (8.3)                          | 54 (11.0)                                                | 302 (6.2)                          |
| Chronic kidney disease                   | 21 (3.5)                                                | 83 (1.4)                           | 19 (3.9)                                                 | 63 (1.3)                           |
| Cardiovascular disease                   | 57 (9.6)                                                | 622 (10.4)                         | 48 (9.8)                                                 | 370 (7.6)                          |
| Myocardial infarction                    | 29 (4.9)                                                | 338 (5.7)                          | 26 (5.3)                                                 | 221 (4.5)                          |
| Ischemic stroke                          | 16 (2.7)                                                | 174 (2.9)                          | 13 (2.7)                                                 | 100 (2.0)                          |
| Peripheral artery disease                | 15 (2.5)                                                | 158 (2.7)                          | 9 (1.8)                                                  | 91 (1.9)                           |
| Heart failure                            | 21 (3.5)                                                | 192 (3.2)                          | 19 (3.9)                                                 | 137 (2.8)                          |
| Atrial fibrillation                      | 53 (8.9)                                                | 373 (6.3)                          | 12 (2.4)                                                 | 216 (4.4)                          |
| Deep vein thrombosis                     | 25 (4.2)                                                | 112 (1.9)                          | 15 (3.1)                                                 | 96 (2.0)                           |
| Pulmonary embolism                       | 8 (1.3)                                                 | 64 (1.1)                           | 5 (1.0)                                                  | 39 (0.8)                           |
| Chronic obstructive<br>pulmonary disease | 18 (3.0)                                                | 125 (2.1)                          | 14 (2.9)                                                 | 112 (2.3)                          |
| Asthma                                   | 53 (8.9)                                                | 212 (3.6)                          | 47 (9.6)                                                 | 164 (3.3)                          |
| Malignancy                               | 105 (17.6)                                              | 1,075 (18.0)                       | 53 (10.8)                                                | 665 (13.6)                         |
| Rheumatoid arthritis                     | 9 (1.5)                                                 | 64 (1.1)                           | 8 (1.6)                                                  | 32 (0.7)                           |
| Systemic inflammatory<br>disease         | 21 (3.5)                                                | 77 (1.3)                           | 12 (2.4)                                                 | 52 (1.1)                           |
| Inflammatory bowel<br>disease            | 14 (2.3)                                                | 89 (1.5)                           | 3 (0.6)                                                  | 70 (1.4)                           |

\* EU 15 comprises of Austria, Belgium, Denmark, Finland, France, Germany, Greece, Ireland, Italy, Luxembourg, Netherlands, Portugal, Spain, Sweden, United Kingdom. The Nordic countries include Denmark, Finland, Iceland, Norway, and Sweden.

**eTable 6.** Odds ratios for Covid-19 requiring ICU-admission by cardiometabolic factors and other comorbidities (n=1,417 cases and n=14,170 control subjects).

| Risk factors           | Adjusted for age and sex |           |         | Adjusted model 2† |           |         | Adjusted model 3‡ |           |         |
|------------------------|--------------------------|-----------|---------|-------------------|-----------|---------|-------------------|-----------|---------|
|                        | OR                       | 95% CI    | p-value | OR                | 95% CI    | p-value | OR                | 95% CI    | p-value |
| Type 1 diabetes        | 2.18                     | 1.19-3.98 | 0.011   | 2.84              | 1.55-5.21 | 0.001   | 2.83              | 1.51-5.30 | 0.001   |
| Type 2 diabetes        | 2.88                     | 2.51-3.31 | <0.001  | 2.42              | 2.09-2.79 | <0.001  | 1.94              | 1.64-2.31 | <0.001  |
| Obesity                | 4.17                     | 3.46-5.02 | <0.001  | 4.12              | 3.39-5.02 | <0.001  | 2.91              | 2.34-3.60 | <0.001  |
| Hypertension           | 1.83                     | 1.61-2.09 | <0.001  | 1.82              | 1.59-2.08 | <0.001  | 1.41              | 1.21-1.65 | <0.001  |
| Hyperlipidaemia        | 1.56                     | 1.36-1.79 | <0.001  | 1.47              | 1.28-1.70 | <0.001  | 0.87              | 0.74-1.03 | 0.104   |
| CKD                    | 3.22                     | 2.39-4.33 | <0.001  | 2.91              | 2.12-3.99 | <0.001  | 1.98              | 1.36-2.86 | <0.001  |
| CVD                    | 1.18                     | 0.98-1.42 | 0.089   | 1.12              | 0.93-1.36 | 0.240   | 0.72              | 0.58-0.90 | 0.004   |
| Heart failure          | 1.62                     | 1.24-2.12 | <0.001  | 1.53              | 1.15-2.03 | 0.003   | 0.87              | 0.62-1.24 | 0.442   |
| Atrial fibrillation    | 1.53                     | 1.24-1.90 | <0.001  | 1.69              | 1.36-2.10 | 0.001   | 1.32              | 1.02-1.71 | 0.035   |
| VTE                    | 1.49                     | 1.12-1.99 | 0.006   | 1.62              | 1.21-2.17 | <0.001  | 1.39              | 1.02-1.90 | 0.039   |
| COPD                   | 1.89                     | 1.42-2.52 | <0.001  | 1.85              | 1.37-2.49 | <0.001  | 1.07              | 0.74-1.54 | 0.720   |
| Asthma                 | 3.33                     | 2.76-4.02 | <0.001  | 3.39              | 2.79-4.13 | <0.001  | 2.91              | 2.35-3.62 | <0.001  |
| Malignancy             | 0.99                     | 0.85-1.16 | 0.938   | 1.08              | 0.92-1.26 | 0.358   | 0.98              | 0.83-1.16 | 0.837   |
| Rheumatoid arthritis   | 2.08                     | 1.35-3.18 | 0.001   | 2.22              | 1.45-3.39 | <0.001  | 1.68              | 1.03-2.74 | 0.038   |
| Systemic infl. disease | 2.60                     | 1.85-3.64 | <0.001  | 2.51              | 1.77-3.57 | <0.001  | 1.85              | 1.27-2.70 | 0.001   |
| Infl. bowel disease    | 0.98                     | 0.62-1.53 | 0.917   | 1.10              | 0.69-1.75 | 0.688   | 1.00              | 0.60-1.64 | 0.986   |

†Adjusted for age, sex, educational level, marital status and region of birth.

‡Adjusted for age, sex, educational level, marital status and region of birth and all diagnoses in table 2a.

Supplemental Fig. S1 – Directed Acyclic Graph

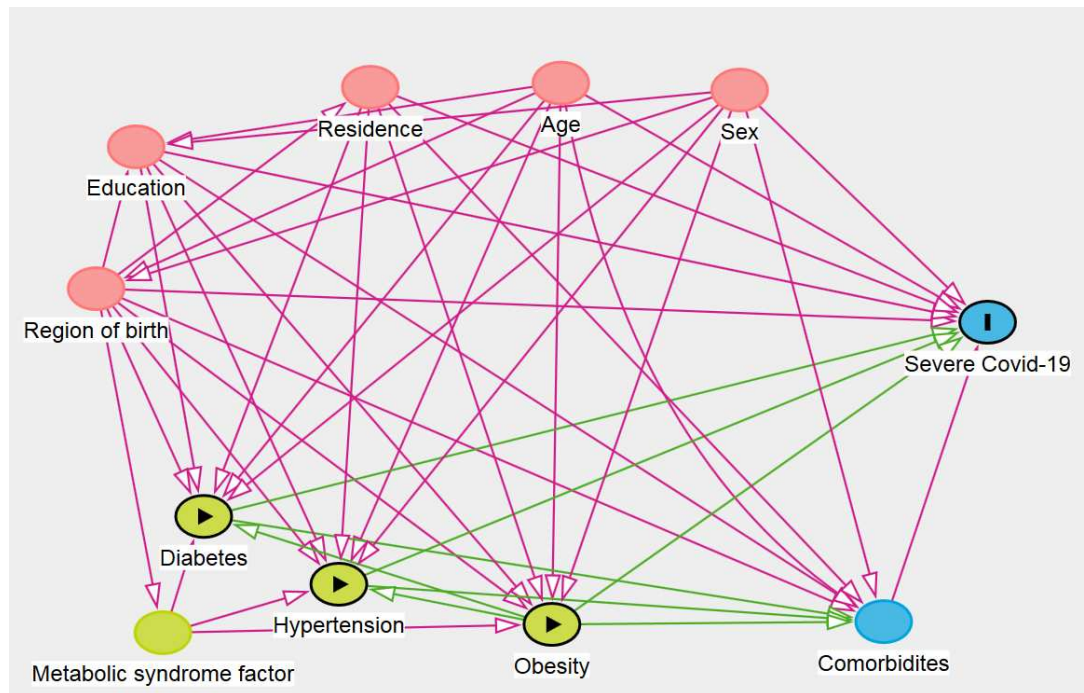

## Supplemental Fig. S2 - Flow chart of exclusion criteria

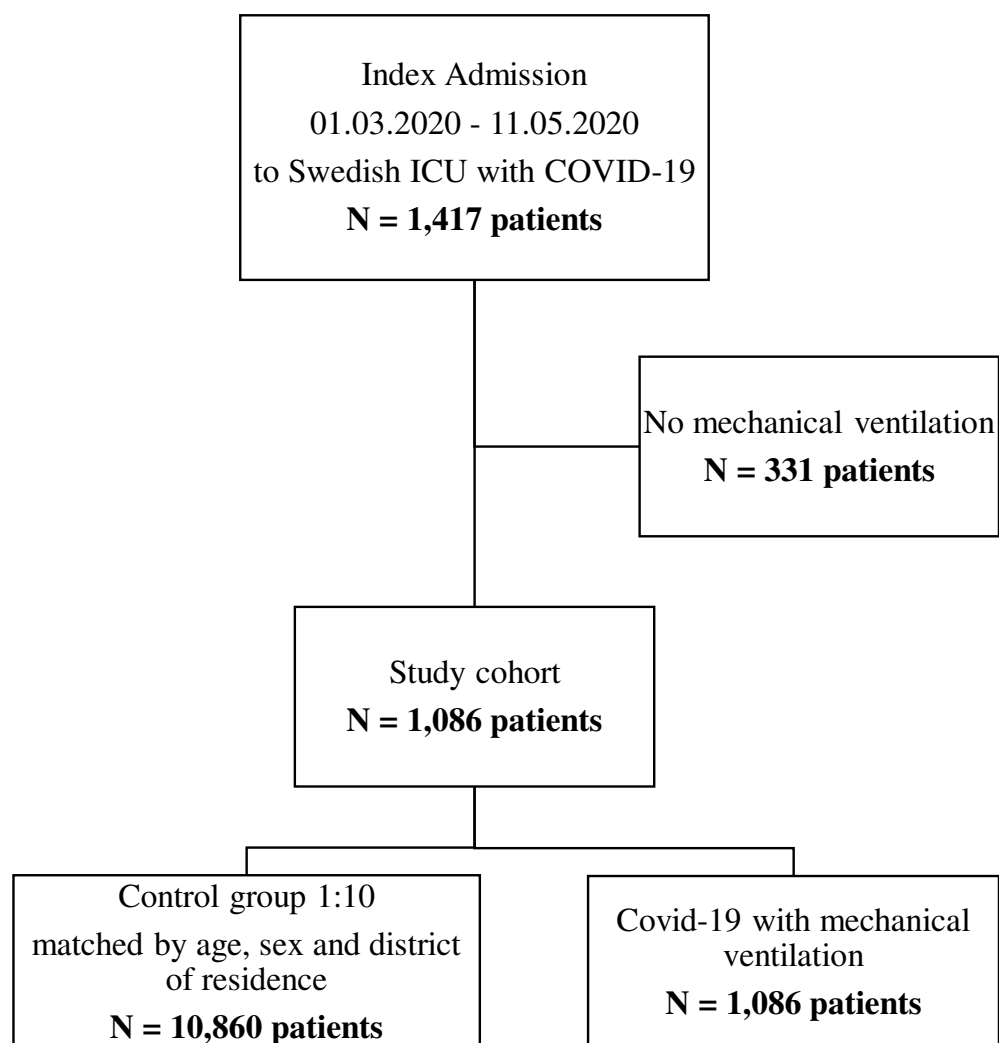

1. Ludvigsson JF, Andersson E, Ekblom A, Feychting M, Kim JL, Reuterwall C, Heurgren M and Olausson PO. External review and validation of the Swedish national inpatient register. *BMC Public Health*. 2011;11:450.
